# Supplementary material for: What is the optimum systemic treatment for advanced/metastatic renal cell carcinoma of favourable, intermediate and poor risk, respectively? A systematic review and network meta-analysis
Source: PubMed Central journal article supplement — BMJ Open. 2020 Aug 27;10(8):e034626. doi: 10.1136/bmjopen-2019-034626 (PMC7454197; doi:10.1136/bmjopen-2019-034626), 2020-08-27
Supplement: bmjopen-2019-034626.draft_revisions.pdf [file bmjopen-2019-034626.draft_revisions.pdf]

# BMJ Open

BMJ Open is committed to open peer review. As part of this commitment we make the peer review history of every article we publish publicly available.

When an article is published we post the peer reviewers' comments and the authors' responses online. We also post the versions of the paper that were used during peer review. These are the versions that the peer review comments apply to.

The versions of the paper that follow are the versions that were submitted during the peer review process. They are not the versions of record or the final published versions. They should not be cited or distributed as the published version of this manuscript.

BMJ Open is an open access journal and the full, final, typeset and author-corrected version of record of the manuscript is available on our site with no access controls, subscription charges or pay-per-view fees (<http://bmjopen.bmj.com>).

If you have any questions on BMJ Open's open peer review process please email [info.bmjopen@bmj.com](mailto:info.bmjopen@bmj.com)

# BMJ Open

## The optimum systemic treatments for advanced/metastatic renal cell carcinoma of favorable-, intermediate-, and poor-risk, respectively: a Bayesian network analysis

|                               |                                                                                                                                                                                                                                                                                                                                                                                                                                   |
|-------------------------------|-----------------------------------------------------------------------------------------------------------------------------------------------------------------------------------------------------------------------------------------------------------------------------------------------------------------------------------------------------------------------------------------------------------------------------------|
| Journal:                      | <i>BMJ Open</i>                                                                                                                                                                                                                                                                                                                                                                                                                   |
| Manuscript ID                 | bmjopen-2019-034626                                                                                                                                                                                                                                                                                                                                                                                                               |
| Article Type:                 | Original research                                                                                                                                                                                                                                                                                                                                                                                                                 |
| Date Submitted by the Author: | 06-Oct-2019                                                                                                                                                                                                                                                                                                                                                                                                                       |
| Complete List of Authors:     | Cao, Guanghui; Henan Provincial People's Hospital<br>Wu, Xiaoqiang; Henan Provincial People's Hospital<br>Wang, Junpeng; Henan Provincial People's Hospital<br>Wang, Zhiwei; Henan Provincial People's Hospital<br>Wu, Xuan; Henan Provincial People's Hospital<br>Zhang, Haotian; Henan Provincial People's Hospital<br>Jing, Gaopeng; Henan Provincial People's Hospital<br>Yan, Tianzhong; Henan Provincial People's Hospital, |
| Keywords:                     | Urological tumours < UROLOGY, Kidney tumours < ONCOLOGY, IMMUNOLOGY                                                                                                                                                                                                                                                                                                                                                               |
|                               |                                                                                                                                                                                                                                                                                                                                                                                                                                   |

SCHOLARONE™  
Manuscripts

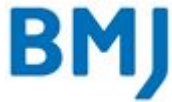

I, the Submitting Author has the right to grant and does grant on behalf of all authors of the Work (as defined in the below author licence), an exclusive licence and/or a non-exclusive licence for contributions from authors who are: i) UK Crown employees; ii) where BMJ has agreed a CC-BY licence shall apply, and/or iii) in accordance with the terms applicable for US Federal Government officers or employees acting as part of their official duties; on a worldwide, perpetual, irrevocable, royalty-free basis to BMJ Publishing Group Ltd ("BMJ") its licensees and where the relevant Journal is co-owned by BMJ to the co-owners of the Journal, to publish the Work in this journal and any other BMJ products and to exploit all rights, as set out in our [licence](#).

The Submitting Author accepts and understands that any supply made under these terms is made by BMJ to the Submitting Author unless you are acting as an employee on behalf of your employer or a postgraduate student of an affiliated institution which is paying any applicable article publishing charge ("APC") for Open Access articles. Where the Submitting Author wishes to make the Work available on an Open Access basis (and intends to pay the relevant APC), the terms of reuse of such Open Access shall be governed by a Creative Commons licence – details of these licences and which [Creative Commons](#) licence will apply to this Work are set out in our licence referred to above.

Other than as permitted in any relevant BMJ Author's Self Archiving Policies, I confirm this Work has not been accepted for publication elsewhere, is not being considered for publication elsewhere and does not duplicate material already published. I confirm all authors consent to publication of this Work and authorise the granting of this licence.

1  
2  
3  
4 **The optimum systemic treatments for advanced/metastatic renal cell**  
5  
6 **carcinoma of favorable-, intermediate-, and poor-risk, respectively: a**  
7  
8 **Bayesian network analysis**  
9  
10

11  
12  
13 Guanghui Cao, Xiaoqiang Wu, Junpeng Wang, Zhiwei Wang, Xuan Wu, Haotian Zhang, Gaopeng  
14  
15 Jing, Tianzhong Yan  
16

17  
18  
19 Department of Urology, Henan Provincial People's Hospital, Zhengzhou University People's  
20  
21 Hospital, Zhengzhou 450003, China;  
22

23  
24  
25 # Correspondence to Prof Tianzhong Yan PhD, Department of Urology, Henan Provincial People's  
26  
27 Hospital, Zhengzhou University People's Hospital, Zhengzhou 450003, China.  
28

29 E-mail address: ytz460@hotmail.com (Tianzhong Yan), wuxiaoqiang2005@126.com (Xiaoqiang  
30  
31 Wu).  
32

33 Tel.: + 86 731 87160355; fax: + 86 431 87160356.  
34  
35  
36  
37  
38  
39  
40  
41  
42  
43  
44  
45  
46  
47  
48  
49  
50  
51  
52  
53  
54  
55  
56  
57  
58  
59  
60

## Abstract

**Purpose:** Advanced/metastatic renal cell carcinoma (RCC) is a heterogeneous group of conditions with different risk stratification. The optimum systemic therapies for advanced/metastatic RCC of favorable-, intermediate-, and poor-risk have not been established. We aimed to compare and rank the effects associated with systemic therapies in the first-line setting.

**Methods:** We searched Pubmed, Cochrane databases, Web of Science, and ClinicalTrials.gov for randomized controlled trials (RCTs) published up to September 2019, of the above 11 treatments for advanced/metastatic RCC. Analysis was done on a Bayesian framework.

**Results:** 13 unique RCTs including 7 248 patients were identified. For advanced/metastatic RCC of favorable-risk, temsirolimus plus bevacizumab, and nivolumab plus ipilimumab were associated with significantly worse progression-free survival (PFS) than sunitinib (HR 1.96, 95% CI 1.04-3.63; and HR 1.56, 95% CI 1.32-1.84, respectively). For intermediate-risk patients, nivolumab plus ipilimumab and cabozantinib were associated with significantly higher improvement in PFS than sunitinib (HR 0.66, 95% CI 0.54-0.81; HR 0.64, 95% CI 0.43-0.96, respectively). For poor-risk, nivolumab plus ipilimumab provided obvious PFS advantage over sunitinib (HR 0.57; 95% CI 0.4-0.70). For PFS, there was a 41.7% likelihood that sunitinib was the preferred treatment for favorable-risk patients. There was a 38.3% likelihood that cabozantinib was the preferred option for intermediate-risk patients. There was a 67.7% chance that nivolumab plus ipilimumab was the best therapy for poor-risk patients. There were no significant differences in the rate of drug-related adverse events.

**Conclusion:** Sunitinib, cabozantinib, and nivolumab plus ipilimumab might be the optimum treatments for advanced/metastatic RCC of favorable-risk, poor-risk, and poor-risk, respectively.

**Keywords:** renal cell carcinoma; systemic therapies; risk stratification; efficacy; safety.

## 1. Introduction

Renal cell carcinoma (RCC) comprises approximately 90% of renal cancer, and represents approximately 2-3% of all new cancers worldwide [1]. It was estimated that there would be 62 700 new cases of renal cancer and 14 240 renal cancer-related deaths in the United States in 2016 [2]. In the European Union, new renal cancer cases and deaths in 2012 were approximately 84 400 and 34 700, respectively [3]. Up to 30% of patients present with advanced/metastatic RCC at the time of initial diagnosis [4, 5]. Advanced/metastatic RCC is not a single condition, but is actually a heterogeneous group of conditions with different prognosis. The most widely accepted prognostic model is from the Memorial Sloan Kettering Cancer Center (MSKCC) and stratifies patients into favorable-, intermediate-, and poor-risk groups depending on the existence of well-characterized laboratory and clinical risk factors. The 2-year survival rates were 45%, 17%, and 3% for favorable-, intermediate-, and poor-risk groups, respectively [6]. In this systematic review, we focus on favorable-, intermediate-, and poor-risk patients with advanced/metastatic RCC.

In recent years, systemic treatment for advanced/metastatic RCC has changed from cytokines to drugs targeting angiogenesis. To date, eight targeted drugs have been approved for treating advanced/metastatic RCC both in USA and Europe: five tyrosine kinase inhibitors (TKIs): sunitinib, sorafenib, pazopanib, cabozantinib, and axitinib; two mammalian target of rapamycin (mTOR) complex 1 kinase inhibitors: temsirolimus, and everolimus; and the recombinant humanized antivascular endothelial growth factor (VEGF) monoclonal antibody bevacizumab combined with interferon- $\alpha$  (IFN- $\alpha$ ). All eight targeted drugs showed significant survival benefit in randomized trials and established a prominent role in treating advanced/metastatic RCC [7-14]. More recently, immune checkpoint antibodies have introduced a new treatment option. CheckMate 214 reported that nivolumab plus ipilimumab was associated with a significantly higher overall survival than sunitinib in the first-line setting [15]. To further improve their efficacy, the combination of different classes of agents is currently evaluated in clinical trials [16-19]. However, there are insufficient

1  
2  
3  
4 head-to-head RCTs to directly investigate the comparative effectiveness of all  
5 available therapies. Given the variety of treatment options for patients  
6 advanced/metastatic RCC and the limited evidence regarding the optimum treatment  
7 strategy, it is a challenge for clinicians to make the best decision.  
8  
9

10  
11 A previous meta-analysis was attempted to investigate the comparative effects of  
12 different systemic agents for treatment of advanced/metastatic RCC [20]. However,  
13 trials included in the systematic review enrolled patients with different risk groups.  
14 The analysis used aggregate data and did not perform subgroup analysis based on risk  
15 strata. In the present study, we performed a Bayesian network meta-analysis to  
16 compare first-line systemic treatments for advanced/metastatic RCC of favorable-,  
17 intermediate-, and poor-risk, respectively. Network meta-analysis enables indirect  
18 comparisons based on a common comparator treatment when a head-to-head trial is  
19 unavailable and integrates direct and indirect comparisons to compare several  
20 treatment strategies while fully respecting randomization [21, 22]. We aimed to  
21 summarize and compare the efficacy and safety associated with currently available  
22 systemic therapies for treating advanced/metastatic RCC of different risk categories  
23 using network meta-analysis.  
24  
25  
26  
27  
28  
29  
30  
31  
32  
33  
34  
35  
36  
37  
38

## 39 **2. Methods**

### 40 *2.1. Literature-search strategy*

41  
42 A comprehensive literature search was performed in Pubmed, Web of Science,  
43 ClinicalTrials.gov, and Cochrane databases for RCTs of systemic therapies of  
44 advanced/metastatic RCC (appendix for all search terms). All the reference lists of  
45 identified trials and related reviews were examined to find potential trials. The search  
46 was conducted in September 2019. There were no publication date or language  
47 restrictions.  
48  
49  
50  
51  
52  
53  
54  
55

### 56 *2.2. Inclusion and exclusion criteria*

57  
58 All studies were selected according to the search strategy based on Preferred  
59 Reporting Items for Systematic Reviews and Meta-analyses criteria[23]. Studies were  
60

1  
2  
3  
4 included if they satisfied three criteria: (1) the study enrolled patients who had  
5 histologically or cytologically confirmed advanced/metastatic RCC of favorable-,  
6 intermediate-, or poor-risk; (2) patients were randomly assigned to receive systemic  
7 therapies alone or in combination. Relevant interventions included, but were not  
8 restricted to: sorafenib, sunitinib, pazopanib, cabozantinib, nivolumab, ipilimumab,  
9 axitinib, tivozanib, everolimus, temsirolimus, bevacizumab, IFN- $\alpha$  or IL-2. Previous  
10 systemic therapy for advanced/metastatic RCC was not allowed; (3) one or more of  
11 the outcomes of interest mentioned below were reported. Nonoriginal articles,  
12 duplicate reports and non-RCTs were excluded.  
13  
14  
15  
16  
17  
18  
19  
20  
21  
22

### 23 *2.3. Data Extraction and Quality Assessment*

24  
25 Two researchers (GH. Cao and XQ. Wu) examined the manuscripts of included  
26 trials independently, and extracted data into a structured form, including patient  
27 characteristics, treatment strategies, and interest outcomes [PFS, high-grade (grade  
28  $\geq 3$ ) and overall drug-related adverse events]. Data were extracted from  
29 intention-to-treat analyses as far as possible. The methodological quality of included  
30 RCTs was assessed using the Cochrane risk of bias assessment tool [24].  
31 Disagreement between investigators was resolved by consensus.  
32  
33  
34  
35  
36  
37  
38  
39  
40

### 41 *2.4. Data synthesis and analysis*

42  
43 First, we performed traditional meta-analyses to compare the treatments using Stata  
44 v.12 (StataCorp, College Station, TX, USA). We applied the chi-square test and the  $I^2$   
45 statistic to investigate the possibility of heterogeneity among studies. A P value  $< 0.10$   
46 or an  $I^2 > 50\%$  suggested the presence of substantial heterogeneity.  
47  
48  
49

50  
51 Second, we did Bayesian network meta-analyses. For meta-analysis of PFS, the  
52 reported adjusted hazard ratios (HRs) with 95% CIs were applied as the outcome  
53 measure. For studies not reporting HRs, we calculated them employing the pragmatic  
54 approach reported by Tierney et al [25]. For drug-related adverse events, we  
55 calculated odds ratios (ORs) of every trial for meta-analysis. Both random-effects and  
56 fixed-effects models were performed for the analyses [26]. Goodness of model fit was  
57  
58  
59  
60



1  
2  
3  
4 assessed using the deviance information criterion and between-study standard  
5 deviation [26, 27]. Convergence was determined graphically according to the method  
6 described by Gelman *et al* [28].  
7  
8

9  
10 It is believed that certain systemic treatments are effective in certain risk groups  
11 than others, for example sunitinib is more effective in favorable-risk patients and  
12 nivolumab plus ipilimumab is more effective in intermediate and poor-risk patients  
13 [29], suggesting that there is a treatment-by-risk group (favorable-, intermediate-, and  
14 poor-risk groups) interaction. Taking no account of this possible interaction in the  
15 analysis, we suppose the transitivity assumption across all included trials would be  
16 violated. Consequently, we performed all network analyses separately by risk groups  
17 (favorable-, intermediate-, and poor-risk groups) according to the MSKCC risk  
18 model .  
19  
20  
21  
22  
23  
24  
25  
26

27 One key assumption for network analysis is that direct and indirect comparisons do  
28 not disagree beyond chance [26, 30, 31]. To explore for evidence of inconsistency in  
29 the network, investigators compared the estimated treatment effects from the entire  
30 network with traditional pair-wise estimates [31]. Sensitivity analyses were performed  
31 restricted to trials that assessed approved systemic therapies. Publication bias and  
32 small-study effects were assessed using funnel plots [32].  
33  
34  
35  
36  
37  
38

39 We performed the Bayesian network analysis using OpenBUGS version 3.2.2 for  
40 PFS, and Gemtc version 0.14.3 (van Valkenhoef *et al*, 2012) for adverse events. For  
41 PFS, we applied 15 000 iterations obtained after a training phase of 10 000-iteration.  
42 In order to minimize autocorrelation, we applied a thinning interval of 50 for each  
43 chain. For adverse events, we applied the 60 000 iterations after a training phase of 40  
44 000 iterations.  
45  
46  
47  
48  
49  
50  
51

## 52 **3. Results**

### 53 *3.1. Search results and study characteristics*

54  
55 The literature search yielded 1 733 potentially eligible studies, of which 1 625 were  
56 excluded based on screening titles and abstracts (Fig. 1). The full text of 108  
57  
58  
59  
60

1  
2  
3  
4 remaining studies were analyzed, and finally 19 publications reporting 13 unique  
5 RCTs were included (Table), involving 7 248 participants randomly assigned to one  
6 of the 11 treatment strategies: sorafenib, sunitinib, pazopanib, cabozantinib,  
7 nivolumab plus ipilimumab, axitinib, tivozanib, everolimus, IFN- $\alpha$ , bevacizumab plus  
8 IFN- $\alpha$ , and temsirolimus plus bevacizumab. According to the MSKCC criteria, there  
9 were 2 318, 4 413 and 517 participants had favorable-, intermediate-, and poor-risk  
10 disease, respectively.  
11  
12

13  
14  
15  
16  
17 The main characteristics of included RCTs are summarized in Table. The  
18 demographic characteristics of patients were well balanced across trials. Enrolled  
19 patients across trials were similar in terms of age, gender, and risk classification.  
20  
21 Across trials, the median age of patients ranged from 58 to 64 years. The participants  
22 were predominantly male (71%, 5 163 of 7 248). The included trials were designed  
23 similarly. Median follow-up ranged from 18.75 to 58 months. The mean sample sizes  
24 were 105, 184 and 37 patients per group for favorable-, intermediate- and poor-risk  
25 subtypes, respectively. 11 trials selected for clear-cell carcinoma subtypes [8-10, 14,  
26 15, 33-38], and two trials also included small subsets of non-clear-cell histotypes,  
27 each comprising 11% and 14% of the study population, respectively [39, 40]. All  
28 studies were two-arm trials. The dosages used in most of trials were within the  
29 recommended dose ranges.  
30  
31  
32  
33  
34  
35  
36  
37  
38  
39

40 In this network meta-analysis, results are reported based on fixed-effects models  
41 because they demonstrated better goodness of fit compared with random-effects  
42 models. The results of random-effects models are available in appendix Table 1-5.  
43  
44  
45  
46  
47

### 48 *3.2. Progression-free survival*

49  
50 *3.2.1.* For advanced/metastatic RCC of favorable-risk, 11 trials enrolling 2 318 total  
51 patients reported adequate information on progression-free survival and contributed to  
52 network meta-analysis (Fig. 2A) [8-11, 14, 15, 34-37, 39, 40]. Fig. 2B summarises the  
53 results of the network meta-analysis for PFS. Compared with sunitinib, IFN- $\alpha$ ,  
54 temsirolimus plus bevacizumab, and nivolumab plus ipilimumab were associated with  
55 significantly worse PFS (HR 2.70, 95% CI 1.59-4.51; HR 1.96, 95% CI 1.04-3.63;  
56  
57  
58  
59  
60

1  
2  
3  
4 and HR 1.56, 95% CI 1.32-1.84, respectively). Based on the analysis of SUCRA,  
5  
6 there was a 41.7% chance that sunitinib provided the greatest PFS benefit for patients  
7  
8 with favorable-risk disease (Fig. 2C).  
9

10  
11 3.2.2. For advanced/metastatic RCC of intermediate-risk, 12 trials enrolling 4 413  
12  
13 total patients contributed to the analysis of PFS (Fig. 3A) [8-11, 14, 15, 33-37, 40].  
14  
15 Network meta-analysis demonstrated that nivolumab plus ipilimumab and  
16  
17 cabozantinib were associated with significantly higher improvement in PFS than  
18  
19 sunitinib (HR 0.66, 95% CI 0.54-0.81; HR 0.64, 95% CI 0.43-0.96, respectively).  
20  
21 Temsirolimus plus bevacizumab, and bevacizumab plus IFN- $\alpha$  were significantly less  
22  
23 efficacious for PFS than sunitinib (HR 1.85, 95% CI 1.21-2.81; HR 1.68, 95% CI  
24  
25 1.18-2.40) (Fig. 3B). Based on the analysis of SUCRA, cabozantinib was most likely  
26  
27 to be the best treatment for intermediate-risk patients. Nivolumab plus ipilimumab  
28  
29 was likely to be second-best treatment, while axitinib and tivozanib had a similar  
30  
31 likelihood of being the third-best option for patients with intermediate-risk disease  
32  
33 (Fig. 3C).  
34  
35

36  
37 3.2.3. Based on data that was available for advanced/metastatic RCC of poor-risk, the  
38  
39 network involved seven trials comparing seven different treatments (517 total patients;  
40  
41 Fig. 4A) [14, 15, 33-35, 37, 40]. Network meta-analysis demonstrated that only  
42  
43 nivolumab plus ipilimumab was associated with a significantly higher improvement in  
44  
45 PFS than sunitinib (HR 0.57; 95% CI 0.4-0.70) (Fig. 4B). On SUCRA-based analysis,  
46  
47 there was a 67.7% probability that nivolumab plus ipilimumab had the greatest PFS  
48  
49 for poor-risk patients (Fig. 4C)  
50

### 51 52 3.3. *Adverse events* 53

54  
55 Seven trials contributed to our analysis of overall and high-grade drug-related adverse  
56  
57 events [8, 9, 11, 14, 15, 36, 39]. All the seven trials did not provide adverse events  
58  
59 data for different risk groups, so we extracted a summary of adverse event data.  
60  
Results of comparisons of adverse events of seven systemic treatments are presented

1  
2  
3  
4 in Fig. 5 and appendix Fig. 1 Stepwise comparison of all the seven therapies did not  
5 find significant differences in rates of high-grade or overall adverse events.  
6  
7

### 9 3.4. Network assumptions, sensitivity analysis, publication bias, and risk of bias

10 Consistencies between direct and indirect evidence were noted for any comparisons  
11 (Fig. 6 and appendix Table 1-5). Results from the sensitivity analyses were in line  
12 with the primary analysis (appendix Table 6). The comparison-adjusted funnel plot  
13 (Fig. 7) for PFS was largely symmetric, indicating no obvious small-study effects and  
14 publication bias. The methodological quality was moderate in the included studies  
15 (appendix Fig. 2). All trials were thought to have low risk of bias for random  
16 sequence generation, incomplete outcome data, and selective reporting of outcomes.  
17 Eight trials had evidence of high risk of bias for masking [10, 11, 14, 35-37, 39, 40].  
18  
19  
20  
21  
22  
23  
24  
25  
26  
27

## 28 4. Discussion

29 Our network meta-analysis of 13 RCTs including 7 248 individuals assessed the  
30 efficacy and safety of all major systematic therapies for the treatment of  
31 advanced/metastatic RCC in the first-line setting. Findings of this meta-analysis might  
32 help to choose among systemic agents for the management of patients with previously  
33 untreated advanced/metastatic RCC. For advanced/metastatic RCC of favorable-risk,  
34 sunitinib was most likely to be the best treatment regimen. For patients with  
35 intermediate-risk, cabozantinib seemed to be the most efficacious treatment strategy.  
36 For poor-risk patients, nivolumab plus ipilimumab provided obvious PFS advantages  
37 over other treatments. In terms of drug-related adverse events, there were no  
38 significant differences among systemic therapies.  
39  
40  
41  
42  
43  
44  
45  
46  
47  
48  
49

50 In RCC with clear cell subtype, hypoxia-inducible factor (HIF) accumulation due to  
51 loss of von Hippel-Lindau (VHL) leads to overexpression of VEGF and platelet  
52 derived growth factor (PDGF), which promotes tumor angiogenesis [41-43]. This  
53 process substantially makes a contribution to the development and progression of  
54 clear cell RCC. Inhibiting the VEGF signaling has been supposed as the key  
55 mechanism for antitumor effects in clear cell RCC. To date, eight targeted drugs have  
56  
57  
58  
59  
60

1  
2  
3  
4 been approved for treating advanced RCC: sunitinib, sorafenib, pazopanib,  
5 cabozantinib, axitinib, everolimus, temsirolimus, and bevacizumab (in combination  
6 with IFN- $\alpha$ ).  
7

8  
9 As shown in this analysis, for patients with intermediate-risk, sunitinib resulted in a  
10 significant PFS benefit compared with everolimus. The varied clinical benefit could  
11 be associated with mechanisms of action of TKI and mTOR inhibitor. Sunitinib not  
12 be associated with mechanisms of action of TKI and mTOR inhibitor. Sunitinib not  
13 only inhibit VEGF receptors -1, -2, and -3, which may be the most clearly relevant  
14 targets in RCC so far, but also exhibit potent activity against PDGF receptor [9, 44]. It  
15 has been reported that PDGF plays a critical role in the recruitment of pericytes to  
16 sprouting tumor vessels, and pericyte-covered vessels are more likely resistant to  
17 anti-vascular therapy than those pericyte-negative vessels [45, 46]. The mTOR  
18 complex is the upstream of an intracellular signaling network regulating cell growth  
19 and angiogenesis, and it plays a key role in the pathogenesis of advanced/metastatic  
20 RCC [47]. It has been demonstrated that rapamycin analogs, including everolimus and  
21 temsirolimus, inhibit only one of two signaling complexes of mTOR [48]. The  
22 mTORC1 signaling is potently inhibited by everolimus and temsirolimus, while the  
23 mTORC2 signaling is not [49]. Consequently, one downstream signaling of mTOR  
24 activation is unopposed. The relatively unsatisfactory efficacy should disable the  
25 mTOR inhibitors as more suitable therapies for the treatment of advanced/metastatic  
26 RCC than TKIs. Regarding TKIs, our results suggest that sunitinib was most likely  
27 to be the best treatment regimen for patients with favorable-risk disease.  
28  
29

30  
31 A potentially additive benefit from combinations of targeted drugs has been  
32 suggested on the basis that they inhibit separate cellular pathways. However, our  
33 results show that temsirolimus plus bevacizumab, and bevacizumab plus IFN- $\alpha$   
34 provide little survival benefit compared with sunitinib, further confirming absence of  
35 evidence that combination treatment simultaneously inhibiting both VEGF and  
36 mTOR signaling results in therapeutic synergy [17, 19, 37, 50, 51].  
37  
38

39  
40 For patients with intermediate-risk, cabozantinib seemed to be the most efficacious  
41 treatment strategies. Our study results show that cabozantinib demonstrates clinical  
42 superiority over sunitinib among patients with intermediate-risk. The benefit of  
43  
44  
45  
46  
47  
48  
49  
50  
51  
52  
53  
54  
55  
56  
57  
58  
59  
60

1  
2  
3  
4 cabozantinib over sunitinib may reflect the target tyrosine kinases of cabozantinib,  
5 which includes AXL and MET in addition to VEGF receptors. It is reported that  
6 upregulated AXL or MET is closely related to resistance to VEGF receptor inhibitors  
7 and poor prognosis in several cancer models [52-55]. Therefore, targeting these two  
8 oncoproteins in addition to VEGF receptors may provide further antitumor effects in  
9 RCC than more selective VEGF receptors targeted agents.  
10  
11  
12  
13  
14

15 Immune checkpoint antibodies block the inhibitory T-cell receptor programmed  
16 death-1 (PD-1) or cytotoxic T-lymphocyte antigen 4 (CTLA-4)-signaling to augment  
17 tumor specific immune response [56]. Nivolumab (an anti-PD-1 antibody) is  
18 approved for the treatment of advanced RCC in the second line setting. Ipilimumab  
19 (an anti-CTLA-4 antibody) is approved for the treatment of advanced melanoma.  
20 Nivolumab plus ipilimumab has been reported significant efficacy in multiple tumor  
21 types [57-60].  
22  
23  
24  
25  
26  
27  
28

29 In this analysis, nivolumab plus ipilimumab was associated with a significant PFS  
30 advantage compared with sunitinib among intermediate- and poor-risk patients. In  
31 contrast, sunitinib was associated with a significantly longer PFS than nivolumab plus  
32 ipilimumab among favorable-risk patients. The inconsistent results of the comparison  
33 between nivolumab plus ipilimumab and sunitinib may be explained by different  
34 mechanisms of action. It's reported that immunotherapy might be associated with  
35 "pseudo-progression" phenomenon according to the (Response Evaluation Criteria in  
36 Solid Tumors) RECIST criteria [61, 62]. For instance, in a subgroup analysis of the  
37 CheckMate 025 trial comparing nivolumab with everolimus for mRCC in second-line  
38 setting, 69% patients treated beyond progression demonstrated sustained tumor  
39 reduction or target lesion stabilization [63]. As such, no significant PFS results in  
40 immunotherapy clinical trials are understandable, and this different mechanism of  
41 action likely explains inconsistent results of nivolumab plus ipilimumab compared  
42 with sunitinib. Regardless of the mechanism, these results highlight the need to better  
43 understand the biologic mechanisms of different treatment regimens. Combinations of  
44 immune therapy with targeted therapy may provide the best opportunity to maximize  
45 survival benefit [64].  
46  
47  
48  
49  
50  
51  
52  
53  
54  
55  
56  
57  
58  
59  
60

1  
2  
3  
4 There are several factors which make an analysis of OS challenging, therefore  
5 meta-analysis on OS was not performed. First, the OS data were not reported in five  
6 included studies. Second, for the available OS data, there were issues of confounders,  
7 such as crossover to more efficacious treatment and the influence of subsequent  
8 anticancer therapies [33, 36, 65]. These factors can substantially underestimate the  
9 difference between two treatments in terms of OS. In addition, PFS has been  
10 recognized as a surrogate endpoint of OS in medical oncology as well as in  
11 advanced/metastatic RCC in the TKI era [66].  
12  
13  
14  
15  
16  
17  
18

19 The strengths of our study are as follows. To the best of our knowledge, this study  
20 is the first network analysis to compare systemic treatments for advanced/metastatic  
21 RCC separately by risk groups. We applied multiple rigorous search strategies to  
22 retrieve all potentially eligible RCTs. In the present study, we comprehensively  
23 compared and ranked all available first-line systemic therapies for  
24 advanced/metastatic RCC of favorable-, intermediate-, and poor-risk, respectively,  
25 thus providing physicians with an overall appraisal of systemic therapies for different  
26 risk groups. In addition, we used Bayesian network meta-analysis to synthesize data.  
27 This approach provides indirect effect estimates in the absence of head-to-head trial  
28 and incorporates all available information from RCTs while fully maintaining  
29 randomization [21, 22]. We applied various statistical models to increase reliability of  
30 the results. Results were consistent across all analyzed outcomes. Moreover, the  
31 reliability and accuracy of results were corroborated by the low statistical  
32 heterogeneity and excellent model fit. Finally, assessment of both efficacy and  
33 adverse events provides new insights into the benefit-harm balance of different  
34 systemic treatments.  
35  
36  
37  
38  
39  
40  
41  
42  
43  
44  
45  
46  
47  
48  
49

50 However, the limitations of our study must be taken into account. The major  
51 limitation of this network meta-analysis lies in the reporting quality of trials reviewed.  
52 Eight included trials were not masked, which might affect the validity of our findings.  
53 Moreover, this meta-analysis was conducted based on summary statistics rather than  
54 individual patient level data. There might be some confounding factors (*e.g.*, ethnic  
55 origin, prior nephrectomy, *etc.*) at the individual patient level that might influence the  
56  
57  
58  
59  
60

1  
2  
3  
4 benefit of systemic treatments, but were not available; therefore analyses adjusted for  
5 these factors were impossible in our network meta-analysis. Access to patient-level  
6 longitudinal data would allow us to establish more robust and accurate conclusions in  
7 specific subgroups of patients. Moreover, the length of follow-up varied across  
8 studies, resulting in potential variations in survival benefits of systemic treatments.  
9 Due to only five trials reporting median follow-up, sensitivity analyses adjusted for  
10 this factor were impossible. Moreover, individual dosage varied across studies and  
11 data were too sparse to investigate effects of different schedules, which might  
12 somewhat affect the generalisability of our findings. Finally, findings in this  
13 meta-analysis were mainly based on patients with clear-cell advanced RCC, thus no  
14 robust recommendations can be provided for non-clear-cell subtypes.  
15  
16  
17  
18  
19  
20  
21  
22  
23  
24  
25  
26

## 27 **5. Conclusions**

28  
29 Our network meta-analysis suggested that: sunitinib might be the optimum  
30 treatment for advanced/metastatic RCC of favorable-risk; cabozantinib was most  
31 likely to provide the greatest PFS benefit for intermediate-risk patients; nivolumab  
32 plus ipilimumab might be the optimum treatments for poor-risk patients. Further  
33 well-designed, large-scale RCTs are required to confirm and update the findings of  
34 this analysis.  
35  
36  
37  
38  
39  
40  
41  
42

## 43 **Strengths and limitations of this study**

- 44 ▶ This is the first network analysis to compare systemic treatments for  
45 advanced/metastatic RCC separately by risk groups.
- 46 ▶ Various statistical models were applied to synthesize data. The reliability and  
47 accuracy of results were corroborated by the low statistical heterogeneity and  
48 excellent model fit.
- 49 ▶ Assessment of both efficacy and adverse events provides new insights into the  
50 benefit-harm balance of different systemic treatments.
- 51 ▶ Main limitation lies in the reporting quality of trials included.
- 52  
53  
54  
55  
56  
57  
58  
59  
60



### Author Contributions

G-HC and X-QW conceived and designed the meta-analysis, J-PW and Z-ZW identified and acquired reports of trials, and extracted data. XW and H-TZ analyzed and interpreted the data. G-PJ contacted authors of trials for additional information. G-HC and X-QW drafted the manuscript. d T-ZY critically reviewed the manuscript. All authors approved the final submitted version of the report.

**Fundings:** This research was supported by the Henan Provincial Medical Scientific and Technological Research Project (Grant No. 201702191). The sponsor had no role in study design, data collection, data analysis, data interpretation, or writing of the report.

**Conflicts of Interest:** None declared.

### Data Availability Statement

All data relevant to the study are included in the article or uploaded as supplementary information.

### Patient and Public Involvement

Patients or the public WERE NOT involved in the design, or conduct, or reporting, or dissemination of our research.

### References:

1. Ljungberg B, Bensalah K, Canfield S, Dabestani S, Hofmann F, Hora M, et al. EAU guidelines on renal cell carcinoma: 2014 update. *Eur Urol*. 2015;67(5):913-24.
2. Siegel RL, Miller KD, Jemal A. Cancer statistics, 2016. *CA Cancer J Clin*. 2016;66(1):7-30.
3. Ferlay J, Steliarova-Foucher E, Lortet-Tieulent J, Rosso S, Coebergh JW, Comber H, et al. Cancer incidence and mortality patterns in Europe: estimates for 40 countries in 2012. *Eur J Cancer*. 2013;49(6):1374-403.
4. Janzen NK, Kim HL, Figlin RA, Belldegrun AS. Surveillance after radical or partial nephrectomy for localized renal cell carcinoma and management of recurrent disease. *Urol Clin North Am*. 2003;30(4):843-52.
5. Cohen HT, McGovern FJ. Renal-cell carcinoma. *N Engl J Med*. 2005;353(23):2477-90.
6. Motzer RJ, Bacik J, Murphy BA, Russo P, Mazumdar M. Interferon-Alfa as a Comparative Treatment for Clinical Trials of New Therapies Against Advanced Renal Cell Carcinoma. *Journal of Clinical Oncology*. 2002;20(1):289-96.

- 1  
2  
3  
4  
5  
6  
7  
8  
9  
10  
11  
12  
13  
14  
15  
16  
17  
18  
19  
20  
21  
22  
23  
24  
25  
26  
27  
28  
29  
30  
31  
32  
33  
34  
35  
36  
37  
38  
39  
40  
41  
42  
43  
44  
45  
46  
47  
48  
49  
50  
51  
52  
53  
54  
55  
56  
57  
58  
59  
60
7. Rini BI, Halabi S, Rosenberg JE, Stadler WM, Vaena DA, Ou SS, et al. Bevacizumab plus interferon alfa compared with interferon alfa monotherapy in patients with metastatic renal cell carcinoma: CALGB 90206. *J Clin Oncol*. 2008;26(33):5422-8.
8. Negrier S, Jager E, Porta C, McDermott D, Moore M, Bellmunt J, et al. Efficacy and safety of sorafenib in patients with advanced renal cell carcinoma with and without prior cytokine therapy, a subanalysis of TARGET. *Med Oncol*. 2010;27(3):899-906.
9. Sternberg CN, Davis ID, Mardiak J, Szczylik C, Lee E, Wagstaff J, et al. Pazopanib in locally advanced or metastatic renal cell carcinoma: results of a randomized phase III trial. *J Clin Oncol*. 2010;28(6):1061-8.
10. Hutson TE, Lesovoy V, Al-Shukri S, Stus VP, Lipatov ON, Bair AH, et al. Axitinib versus sorafenib as first-line therapy in patients with metastatic renal-cell carcinoma: a randomised open-label phase 3 trial. *Lancet Oncol*. 2013;14(13):1287-94.
11. Motzer RJ, Hutson TE, Cella D, Reeves J, Hawkins R, Guo J, et al. Pazopanib versus sunitinib in metastatic renal-cell carcinoma. *N Engl J Med*. 2013;369(8):722-31.
12. Motzer RJ, Hutson TE, Tomczak P, Michaelson MD, Bukowski RM, Rixe O, et al. Sunitinib versus interferon alfa in metastatic renal-cell carcinoma. *N Engl J Med*. 2007;356(2):115-24.
13. Escudier B, Szczylik C, Hutson TE, Demkow T, Staehler M, Rolland F, et al. Randomized phase II trial of first-line treatment with sorafenib versus interferon Alfa-2a in patients with metastatic renal cell carcinoma. *J Clin Oncol*. 2009;27(8):1280-9.
14. Choueiri TK, Halabi S, Sanford BL, Hahn O, Michaelson MD, Walsh MK, et al. Cabozantinib Versus Sunitinib As Initial Targeted Therapy for Patients With Metastatic Renal Cell Carcinoma of Poor or Intermediate Risk: The Alliance A031203 CABOSUN Trial. *Journal of Clinical Oncology*. 2017;35(6):591-7.
15. Motzer RJ, Tannir NM, McDermott DF, Aren FO, Melichar B, Choueiri TK, et al. Nivolumab plus Ipilimumab versus Sunitinib in Advanced Renal-Cell Carcinoma. *N Engl J Med*. 2018;378(14):1277-90.
16. Jonasch E, Corn P, Pagliaro LC, Warneke CL, Johnson MM, Tamboli P, et al. Upfront, randomized, phase 2 trial of sorafenib versus sorafenib and low-dose interferon alfa in patients with advanced renal cell carcinoma: clinical and biomarker analysis. *Cancer*. 2010;116(1):57-65.
17. Negrier S, Gravis G, Perol D, Chevreau C, Delva R, Bay JO, et al. Temsirolimus and bevacizumab, or sunitinib, or interferon alfa and bevacizumab for patients with advanced renal cell carcinoma (TORAVA): a randomised phase 2 trial. *Lancet Oncol*. 2011;12(7):673-80.
18. Procopio G, Verzoni E, Bracarda S, Ricci S, Sacco C, Ridolfi L, et al. Sorafenib with interleukin-2 vs sorafenib alone in metastatic renal cell carcinoma: the ROSORC trial. *Br J Cancer*. 2011;104(8):1256-61.
19. Ravaud A, Barrios CH, Alekseev B, Tay MH, Agarwala SS, Yalcin S, et al. RECORD-2: phase II randomized study of everolimus and bevacizumab versus interferon alpha-2a and bevacizumab as first-line therapy in patients with metastatic renal cell carcinoma. *Ann Oncol*. 2015;26(7):1378-84.

- 1
- 2
- 3
- 4 20. Wallis CJD, Klaassen Z, Bhindi B, Ye XY, Chandrasekar T, Farrell AM, et al. First-line
- 5 Systemic Therapy for Metastatic Renal Cell Carcinoma: A Systematic Review and Network
- 6 Meta-analysis. *Eur Urol*. 2018;74(3):309-21.
- 7
- 8 21. Caldwell DM, Ades AE, Higgins JP. Simultaneous comparison of multiple treatments:
- 9 combining direct and indirect evidence. *BMJ*. 2005;331(7521):897-900.
- 10
- 11 22. Lu G, Ades AE. Combination of direct and indirect evidence in mixed treatment
- 12 comparisons. *Stat Med*. 2004;23(20):3105-24.
- 13
- 14 23. Liberati A, Altman DG, Tetzlaff J, Mulrow C, Gotzsche PC, Ioannidis JP, et al. The
- 15 PRISMA statement for reporting systematic reviews and meta-analyses of studies that evaluate
- 16 health care interventions: explanation and elaboration. *Ann Intern Med*. 2009;151(4):W65-94.
- 17
- 18 24. Higgins JPT, Altman DG, Gotzsche PC, Juni P, Moher D, Oxman AD, et al. The Cochrane
- 19 Collaboration's tool for assessing risk of bias in randomised trials. *BMJ*. 2011;343.
- 20
- 21 25. Tierney JF, Stewart LA, Ghersi D, Burdett S, Sydes MR. Practical methods for incorporating
- 22 summary time-to-event data into meta-analysis. *Trials*. 2007;8:16.
- 23
- 24 26. Dias S, Welton NJ, Sutton AJ, Ades AE. A Generalised Linear Modelling Framework for
- 25 Pairwise and Network Meta-Analysis of Randomised Controlled Trials. *Medical Decision*
- 26 *Making*. 2014.
- 27
- 28 27. Spiegelhalter DJ, Best NG, Carlin BP, Der Linde AV. Bayesian measures of model
- 29 complexity and fit. *Journal of The Royal Statistical Society Series B-statistical Methodology*.
- 30 2002;64(4):583-639.
- 31
- 32 28. Gelman A, Rubin DB. Markov chain Monte Carlo methods in biostatistics. *Stat Methods*
- 33 *Med Res*. 1996;5(4):339-55.
- 34
- 35 29. Powles T, Albiges L, Staehler M, Bensalah K, Dabestani S, Giles RH, et al. Updated
- 36 European Association of Urology Guidelines Recommendations for the Treatment of First-line
- 37 Metastatic Clear Cell Renal Cancer. *Eur Urol*. 2017;73(3):311-5.
- 38
- 39 30. Caldwell DM, Welton NJ, Ades AE. Mixed treatment comparison analysis provides
- 40 internally coherent treatment effect estimates based on overviews of reviews and can reveal
- 41 inconsistency. *J Clin Epidemiol*. 2010;63(8):875-82.
- 42
- 43 31. Dias S, Welton NJ, Sutton AJ, Caldwell DM, Lu G, Ades AE. Evidence synthesis for
- 44 decision making 4: inconsistency in networks of evidence based on randomized controlled trials.
- 45 *Med Decis Making*. 2013;33(5):641-56.
- 46
- 47 32. Chaimani A, Higgins JP, Mavridis D, Spyridonos P, Salanti G. Graphical tools for network
- 48 meta-analysis in STATA. *PLoS One*. 2013;8(10):e76654.
- 49
- 50 33. Escudier B, Bellmunt J, Negrier S, Bajetta E, Melichar B, Bracarda S, et al. Phase III trial of
- 51 bevacizumab plus interferon alfa-2a in patients with metastatic renal cell carcinoma (AVOREN):
- 52 final analysis of overall survival. *J Clin Oncol*. 2010;28(13):2144-50.
- 53
- 54 34. Rini BI, Halabi S, Rosenberg JE, Stadler WM, Vaena DA, Archer L, et al. Phase III trial of
- 55 bevacizumab plus interferon alfa versus interferon alfa monotherapy in patients with metastatic
- 56 renal cell carcinoma: final results of CALGB 90206. *J Clin Oncol*. 2010;28(13):2137-43.
- 57
- 58
- 59
- 60

- 1  
2  
3  
4 35. Motzer RJ, Hutson TE, Tomczak P, Michaelson MD, Bukowski RM, Oudard S, et al. Overall  
5 survival and updated results for sunitinib compared with interferon alfa in patients with metastatic  
6 renal cell carcinoma. *J Clin Oncol*. 2009;27(22):3584-90.  
7  
8 36. Motzer RJ, Nosov D, Eisen T, Bondarenko I, Lesovoy V, Lipatov O, et al. Tivozanib versus  
9 sorafenib as initial targeted therapy for patients with metastatic renal cell carcinoma: results from  
10 a phase III trial. *J Clin Oncol*. 2013;31(30):3791-9.  
11  
12 37. Rini BI, Bellmunt J, Clancy J, Wang K, Niethammer AG, Hariharan S, et al. Randomized  
13 phase III trial of temsirolimus and bevacizumab versus interferon alfa and bevacizumab in  
14 metastatic renal cell carcinoma: INTORACT trial. *J Clin Oncol*. 2014;32(8):752-9.  
15  
16 38. Motzer RJ, Hutson TE, McCann L, Deen K, Choueiri TK. Overall survival in renal-cell  
17 carcinoma with pazopanib versus sunitinib. *N Engl J Med*. 2014;370(18):1769-70.  
18  
19 39. Procopio G, Verzoni E, Bracarda S, Ricci S, Sacco C, Ridolfi L, et al. Overall survival for  
20 sorafenib plus interleukin-2 compared with sorafenib alone in metastatic renal cell carcinoma  
21 (mRCC): final results of the ROSORC trial. *Ann Oncol*. 2013;24(12):2967-71.  
22  
23 40. Motzer RJ, Barrios CH, Kim TM, Falcon S, Cosgriff T, Harker WG, et al. Phase II  
24 randomized trial comparing sequential first-line everolimus and second-line sunitinib versus  
25 first-line sunitinib and second-line everolimus in patients with metastatic renal cell carcinoma. *J*  
26 *Clin Oncol*. 2014;32(25):2765-72.  
27  
28 41. Yang JC, Haworth L, Sherry RM, Hwu P, Schwartzentruber DJ, Topalian SL, et al. A  
29 randomized trial of bevacizumab, an anti-vascular endothelial growth factor antibody, for  
30 metastatic renal cancer. *N Engl J Med*. 2003;349(5):427-34.  
31  
32 42. Patard JJ, Rioux-Leclercq N, Fergelot P. Understanding the importance of smart drugs in  
33 renal cell carcinoma. *Eur Urol*. 2006;49(4):633-43.  
34  
35 43. Costa LJ, Drabkin HA. Renal cell carcinoma: new developments in molecular biology and  
36 potential for targeted therapies. *Oncologist*. 2007;12(12):1404-15.  
37  
38 44. Mendel DB, Laird AD, Xin X, Louie SG, Christensen JG, Li G, et al. In vivo antitumor  
39 activity of SU11248, a novel tyrosine kinase inhibitor targeting vascular endothelial growth factor  
40 and platelet-derived growth factor receptors: determination of a  
41 pharmacokinetic/pharmacodynamic relationship. *Clin Cancer Res*. 2003;9(1):327-37.  
42  
43 45. Benjamin LE, Hemo I, Keshet E. A plasticity window for blood vessel remodelling is defined  
44 by pericyte coverage of the preformed endothelial network and is regulated by PDGF-B and  
45 VEGF. *Development*. 1998;125(9):1591-8.  
46  
47 46. Gee MS, Procopio WN, Makonnen S, Feldman MD, Yeilding NM, Lee WM. Tumor vessel  
48 development and maturation impose limits on the effectiveness of anti-vascular therapy. *Am J*  
49 *Pathol*. 2003;162(1):183-93.  
50  
51 47. Creighton CJ, Morgan M, Gunaratne PH, Wheeler DA, Gibbs RA, Gordon Robertson A, et  
52 al. Comprehensive molecular characterization of clear cell renal cell carcinoma. *Nature*.  
53 2013;499(7456):43-9.  
54  
55 48. Loewith R, Jacinto E, Wullschlegel S, Lorberg A, Crespo JL, Bonenfant D, et al. Two TOR  
56  
57  
58  
59  
60

1  
2  
3 complexes, only one of which is rapamycin sensitive, have distinct roles in cell growth control.  
4 Mol Cell. 2002;10(3):457-68.

5  
6 49. Inoki K, Guan KL. Complexity of the TOR signaling network. Trends Cell Biol.  
7 2006;16(4):206-12.

8  
9 50. Bukowski RM, Kabbinavar FF, Figlin RA, Flaherty K, Srinivas S, Vaishampayan U, et al.  
10 Randomized phase II study of erlotinib combined with bevacizumab compared with bevacizumab  
11 alone in metastatic renal cell cancer. J Clin Oncol. 2007;25(29):4536-41.

12  
13 51. Hudes G, Carducci M, Tomczak P, Dutcher J, Figlin R, Kapoor A, et al. Temsirolimus,  
14 interferon alfa, or both for advanced renal-cell carcinoma. N Engl J Med. 2007;356(22):2271-81.

15  
16 52. Gibney GT, Aziz SA, Camp RL, Conrad P, Schwartz BE, Chen CR, et al. c-Met is a  
17 prognostic marker and potential therapeutic target in clear cell renal cell carcinoma. Ann Oncol.  
18 2013;24(2):343-9.

19  
20 53. Gustafsson A, Martuszevska D, Johansson M, Ekman C, Hafizi S, Ljungberg B, et al.  
21 Differential expression of Axl and Gas6 in renal cell carcinoma reflecting tumor advancement and  
22 survival. Clin Cancer Res. 2009;15(14):4742-9.

23  
24 54. Ciamporcero E, Miles KM, Adelaiye R, Ramakrishnan S, Shen L, Ku S, et al. Combination  
25 strategy targeting VEGF and HGF/c-met in human renal cell carcinoma models. Mol Cancer Ther.  
26 2015;14(1):101-10.

27  
28 55. Zhou L, Liu XD, Sun M, Zhang X, German P, Bai S, et al. Targeting MET and AXL  
29 overcomes resistance to sunitinib therapy in renal cell carcinoma. Oncogene.  
30 2016;35(21):2687-97.

31  
32 56. Ribas A. Tumor immunotherapy directed at PD-1. N Engl J Med. 2012;366(26):2517-9.

33  
34 57. Hammers HJ, Plimack ER, Infante JR, Rini BI, McDermott DF, Lewis LD, et al. Safety and  
35 Efficacy of Nivolumab in Combination With Ipilimumab in Metastatic Renal Cell Carcinoma: The  
36 CheckMate 016 Study. J Clin Oncol. 2017;35(34):3851-8.

37  
38 58. Antonia SJ, Lopez-Martin JA, Bendell J, Ott PA, Taylor M, Eder JP, et al. Nivolumab alone  
39 and nivolumab plus ipilimumab in recurrent small-cell lung cancer (CheckMate 032): a  
40 multicentre, open-label, phase 1/2 trial. Lancet Oncol. 2016;17(7):883-95.

41  
42 59. Hellmann MD, Rizvi NA, Goldman JW, Gettinger SN, Borghaei H, Brahmer JR, et al.  
43 Nivolumab plus ipilimumab as first-line treatment for advanced non-small-cell lung cancer  
44 (CheckMate 012): results of an open-label, phase 1, multicohort study. Lancet Oncol.  
45 2017;18(1):31-41.

46  
47 60. Larkin J, Hodi FS, Wolchok JD. Combined Nivolumab and Ipilimumab or Monotherapy in  
48 Untreated Melanoma. N Engl J Med. 2015;373(13):1270-1.

49  
50 61. West HJ. JAMA Oncology Patient Page. Immune Checkpoint Inhibitors. JAMA Oncol.  
51 2015;1(1):115.

52  
53 62. Wolchok JD, Hoos A, O'Day S, Weber JS, Hamid O, Lebbe C, et al. Guidelines for the  
54 evaluation of immune therapy activity in solid tumors: immune-related response criteria. Clin  
55 Cancer Res. 2009;15(23):7412-20.  
56  
57  
58  
59  
60

1  
2  
3  
4  
5  
6  
7  
8  
9  
10  
11  
12  
13  
14  
15  
16  
17  
18  
19  
20  
21  
22  
23  
24  
25  
26  
27  
28  
29  
30  
31  
32  
33  
34  
35  
36  
37  
38  
39  
40  
41  
42  
43  
44  
45  
46  
47  
48  
49  
50  
51  
52  
53  
54  
55  
56  
57  
58  
59  
60

63. George S, Motzer RJ, Hammers HJ, Redman BG, Kuzel TM, Tykodi SS, et al. Safety and Efficacy of Nivolumab in Patients With Metastatic Renal Cell Carcinoma Treated Beyond Progression: A Subgroup Analysis of a Randomized Clinical Trial. *JAMA Oncol.* 2016;2(9):1179-86.

64. Atkins MB, Plimack ER, Puzanov I, Fishman MN, McDermott DF, Cho DC, et al. Axitinib in combination with pembrolizumab in patients with advanced renal cell cancer: a non-randomised, open-label, dose-finding, and dose-expansion phase 1b trial. *Lancet Oncol.* 2018;19(3):405-15.

65. Sternberg CN, Hawkins RE, Wagstaff J, Salman P, Mardiak J, Barrios CH, et al. A randomised, double-blind phase III study of pazopanib in patients with advanced and/or metastatic renal cell carcinoma: final overall survival results and safety update. *Eur J Cancer.* 2013;49(6):1287-96.

66. Halabi S, Rini B, Escudier B, Stadler WM, Small EJ. Progression-free survival as a surrogate endpoint of overall survival in patients with metastatic renal cell carcinoma. *Cancer.* 2014;120(1):52-60.

Table: Studies included in the multiple-treatments meta-analysis

| Study                             | Number of patients  | Age (years) median(range) | Sex (% male) | MSKCC (%) |              |      | Median PFS in months (95% CI) | Hazard ratio (95% CI) |
|-----------------------------------|---------------------|---------------------------|--------------|-----------|--------------|------|-------------------------------|-----------------------|
|                                   |                     |                           |              | Favorable | Intermediate | Poor |                               |                       |
| <b>Motzer 2014 (RECORD-3)</b>     |                     |                           |              |           |              |      |                               |                       |
| Everolimus                        | 238                 | 62 (20-89)                | 69.7         | 29        | 56           | 15   | 7.9                           | 1.4 (1.2-1.8)         |
| Sunitinib                         | 238                 | 62 (29-84)                | 73.9         | 30        | 56           | 14   | 10.7                          | 1 (Ref)               |
| <b>Motzer 2014 (COMPARZ)</b>      |                     |                           |              |           |              |      |                               |                       |
| Pazopanib                         | 557                 | 61 (18-88)                | 71           | 27        | 58           | 12   | 8.4 (8.3-10.9)                | 1.05 (0.90-1.22)      |
| Sunitinib                         | 553                 | 62 (23-86)                | 75           | 27        | 59           | 9    | 9.5 (8.3-11.1)                | 1 (Ref)               |
| <b>Rini 2014 (INTORACT)</b>       |                     |                           |              |           |              |      |                               |                       |
| Teniposol plus bevacizumab        | 400                 | 59 (22-87)                | 72           | 28        | 65           | 8    | 9.1 (8.1-10.2)                | 1.1 (0.9-1.3)         |
| Bevacizumab plus IFN- $\alpha$    | 391                 | 58 (23-81)                | 69           | 27        | 65           | 8    | 9.3 (9.0-11.2)                | 1 (Ref)               |
| <b>Procopio 2013 (ROSORC)</b>     |                     |                           |              |           |              |      |                               |                       |
| Sorafenib plus interleukin-2      | 66                  | 64 (57-69) *              | 79           | 55        | 41           | 5    | NA                            | NA                    |
| Sorafenib                         | 62                  | 62 (52-69) *              | 69           | 55        | 39           | 6    | NA                            | NA                    |
| <b>Hutson 2013</b>                |                     |                           |              |           |              |      |                               |                       |
| Axitinib                          | 192                 | 58 (23-83)                | 70           | 49        | 44           | 4    | 10.1 (7.2-12.1)]              | 0.77 (0.56-1.05)      |
| Sorafenib                         | 96                  | 58 (20-77)                | 77           | 55        | 42           | 2    | 6.5 (4.7-8.3)                 | 1 (Ref)               |
| <b>Motzer 2013</b>                |                     |                           |              |           |              |      |                               |                       |
| Tibozanib                         | 260;                |                           |              |           |              |      |                               |                       |
|                                   | treatment-naive 181 | 59 (23-83)                | 71           | 27        | 67           | 7    | 12.7 (9.1-15.0)               | 0.756 (0.580-0.985)   |
| Sorafenib                         | 257;                |                           |              |           |              |      |                               |                       |
|                                   | treatment naive 181 | 59 (23-85)                | 74           | 34        | 62           | 4    | 9.1 (7.3-10.8)                | 1 (Ref)               |
| <b>Sternberg 2010 (VEG105192)</b> |                     |                           |              |           |              |      |                               |                       |
| Pazopanib                         | 290;                |                           |              |           |              |      |                               |                       |
|                                   | treatment naive 155 | 59 (28-82)                | 68           | 36        | 56           | 4    | 11.1                          | 0.40 (0.27-0.60)      |
| Placebo                           | n = 145;            |                           |              |           |              |      |                               |                       |
|                                   | treatment naive 78  | 62 (25-81)                | 74           | 40        | 51           | 6    | 2.8                           | 1 (Ref)               |
| <b>Motzer 2009</b>                |                     |                           |              |           |              |      |                               |                       |
| Sunitinib                         | 375                 | 62 (27-87)                | 71           | 38        | 56           | 6    | 11 (11-13)                    | 0.539 (0.451-0.643)   |
| IFN- $\alpha$                     | 375                 | 59 (34-85)                | 72           | 34        | 59           | 7    | 5 (4-6)                       | 1 (Ref)               |
| <b>Negrier 2010 (TARGET)</b>      |                     |                           |              |           |              |      |                               |                       |
| Sorafenib                         | 451;                |                           |              |           |              |      |                               |                       |
|                                   | treatment-naive 77  | 60                        | 63.6         | 53.2      | 46.8         | 0    | 5.8                           | 0.48 (0.32-0.73)      |
| Placebo                           | 452;                |                           |              |           |              |      |                               |                       |
|                                   | treatment-naive 84  | 60.5                      | 69           | 45.2      | 54.8         | 0    | 2.8                           | 1 (Ref)               |
| <b>Rini 2010 (CALGB 90206)</b>    |                     |                           |              |           |              |      |                               |                       |
| Bevacizumab plus IFN- $\alpha$    | 369                 | 61 (56-70)                | 73           | 26        | 64           | 10   | 8.5 (7.5-9.7)                 | 0.71 (0.61-0.83)      |
| IFN- $\alpha$                     | 363                 | 62 (55-70)                | 66           | 26        | 64           | 10   | 5.2 (3.1-5.6)                 | 1 (Ref)               |

1  
2  
3  
4  
5  
6  
7  
8  
9  
10  
11  
12  
13  
14  
15  
16

| Escudier 2010 (AVOREN)         |     |            |      |    |                   |                   |                   |                              |
|--------------------------------|-----|------------|------|----|-------------------|-------------------|-------------------|------------------------------|
| Bevacizumab plus IFN- $\alpha$ | 327 | 61 (30-82) | 68   | 27 | 56                | 9                 | 10.2              | 0.61 (0.51-0.73)             |
| IFN- $\alpha$                  | 322 | 60 (18-81) | 73   | 29 | 56                | 8                 | 5.4               | 1 (Ref)                      |
| Continued                      |     |            |      |    |                   |                   |                   |                              |
| Motzer 2018 (CheckMate 214)    |     |            |      |    |                   |                   |                   |                              |
| Nivolumab plus Ipilimumab      | 550 | 62 (26-85) | 75   | 23 | 61                | 17                | 11.6 (8.7-15.5)   | 0.82(0.64-1.05) <sup>†</sup> |
| Sunitinib                      | 546 | 62 (21-85) | 72   | 23 | 61                | 16                | 8.4 (7.0-10.8)    | 1 (Ref)                      |
| Choueiri 2017                  |     |            |      |    |                   |                   |                   |                              |
| Capzantinib                    | 79  | 63 (40-82) | 83.5 | 0  | 81.0 <sup>§</sup> | 19.0 <sup>§</sup> | 8.2 ( 6.2 to 8.8) | 0.66 (0.46-0.95)             |
| Sunitinib                      | 78  | 64(31-87)  | 73.1 | 0  | 80.8 <sup>§</sup> | 19.2 <sup>§</sup> | 5.6 (3.4 to 8.1)  | 1 (Ref)                      |

17 IFN- $\alpha$  = interferon- $\alpha$ ; MSKCC = Memorial Sloan Kettering Cancer Center; PFS = progression-free survival; CI = confidence interval; AE = adverse event;  
 18 NA = not available; Ref = reference group (hence hazard ratio set to 1);  
 19 \* interquartile range; † mean; ‡ 99.1% CI; § IMDC risk group, International Metastatic Renal Cell Carcinoma Database Consortium  
 20

21  
22  
23  
24  
25  
26  
27  
28  
29  
30  
31  
32  
33  
34  
35  
36  
37  
38  
39  
40  
41  
42  
43  
44  
45  
46  
47  
48  
49  
50  
51  
52  
53  
54  
55  
56  
57  
58  
59  
60



**Figures**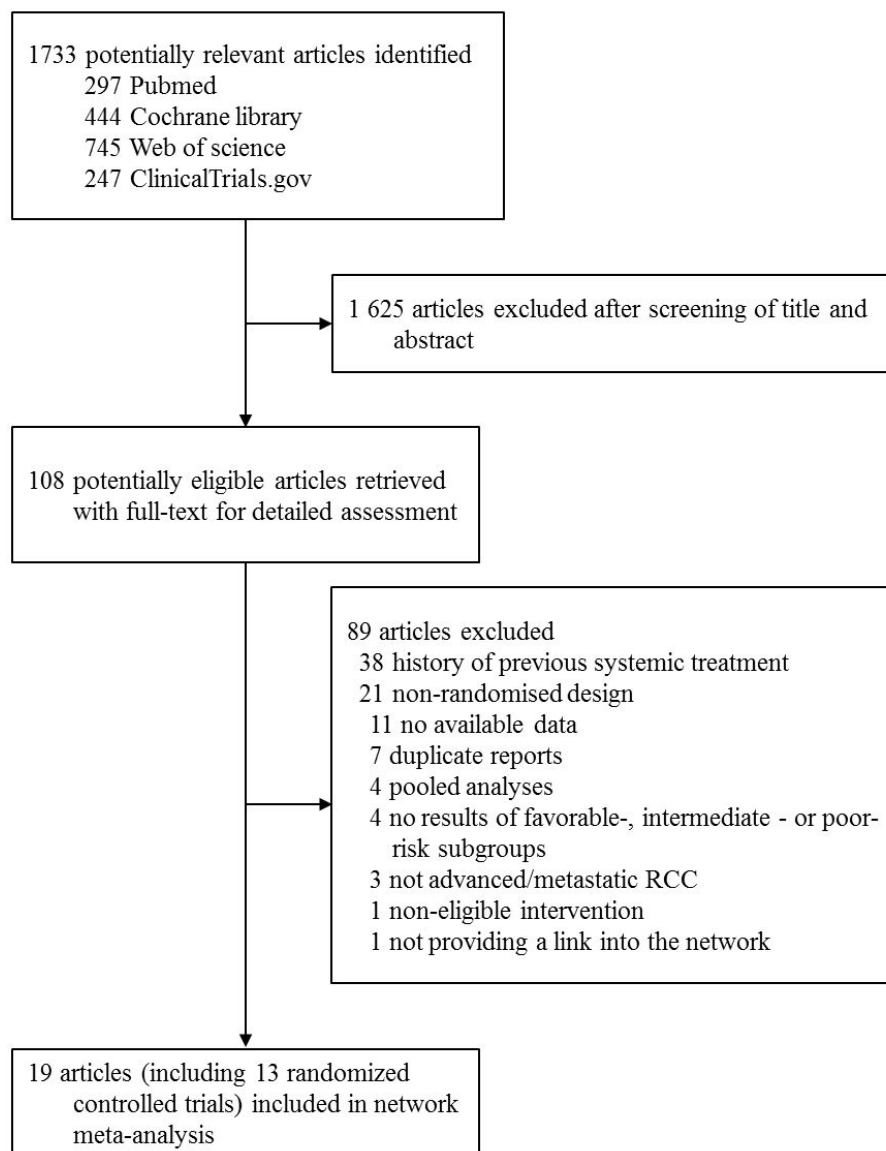**Fig. 1 - Literature search and selection**

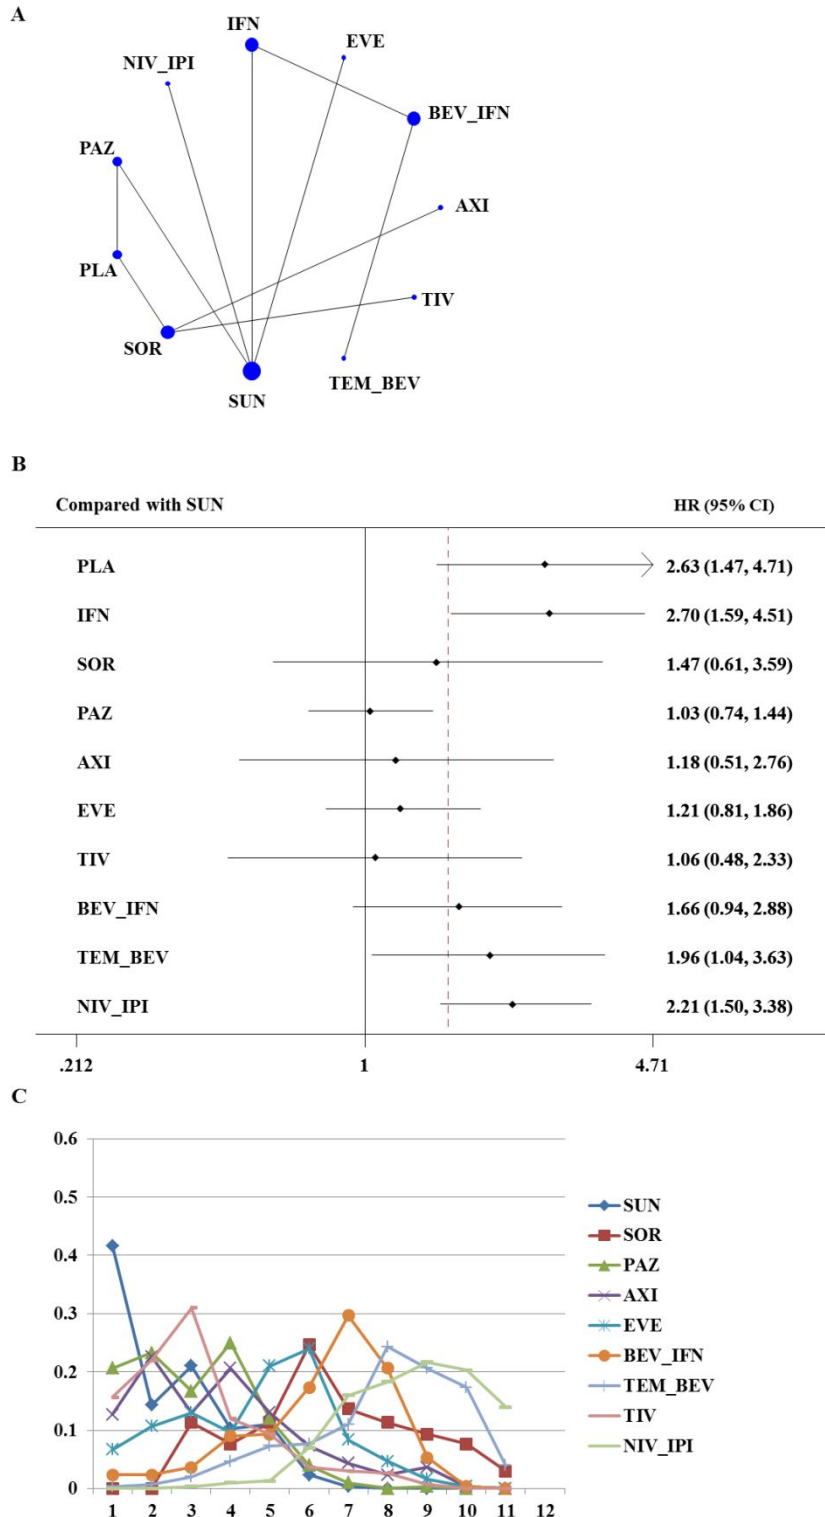

**Fig. 2 - Analysis of progression-free survival for patients with favorable-risk disease.** (A) network diagram: the size of every treatment node corresponds to the number of randomly assigned patients. The width of the lines is proportional to the number of trials. (B) forest plot, with sunitinib as the comparator; (C) SUCRA plot.

1  
2  
3  
4 HR = hazard ratio. CI = confidence interval. Numbers in parentheses indicate 95% credible  
5 intervals. SUN = sunitinib. PLA = placebo. IFN = interferon- $\alpha$ . SOR = sorafenib. PAZ =  
6 pazopanib. AXI = axitinib. EVE = everolimus. TIV = tivozanib. BEV\_IFN = bevacizumab plus  
7 interferon- $\alpha$ . TEM\_BEV = temsirolimus plus bevacizumab. NIV\_IPI = nivolumab plus  
8 ipilimumab.  
9  
10  
11  
12  
13  
14  
15  
16  
17  
18  
19  
20  
21  
22  
23  
24  
25  
26  
27  
28  
29  
30  
31  
32  
33  
34  
35  
36  
37  
38  
39  
40  
41  
42  
43  
44  
45  
46  
47  
48  
49  
50  
51  
52  
53  
54  
55  
56  
57  
58  
59  
60

For peer review only

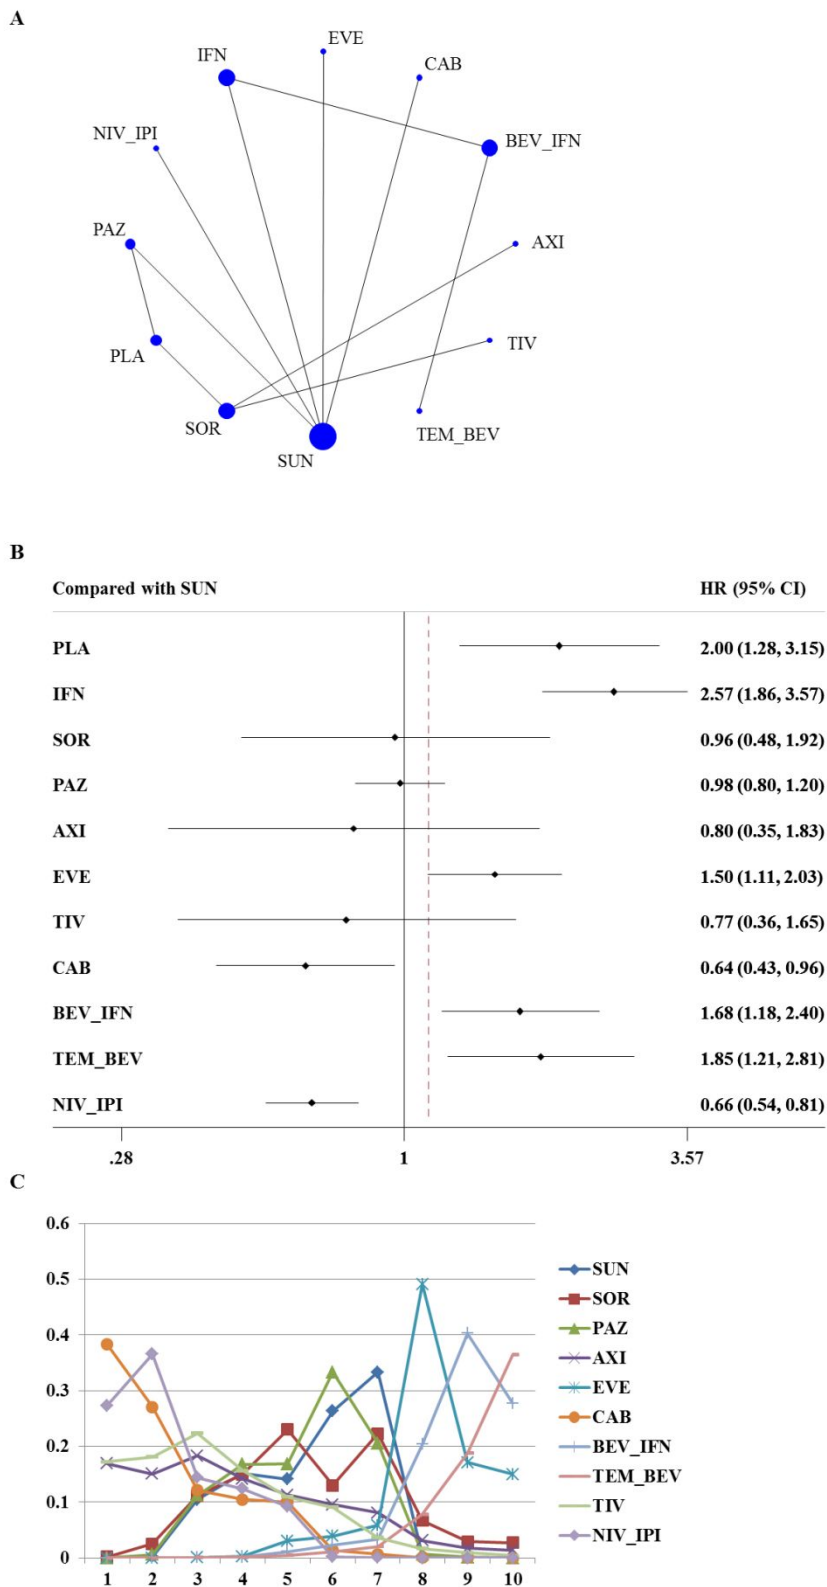

**Fig. 3 - Analysis of progression-free survival for patients with intermediate-risk disease. (A) network diagram. (B) forest plot, with sunitinib as the comparator; (C)**

1  
2  
3  
4 SUCRA plot.

5 HR = hazard ratio. CI = confidence interval. Numbers in parentheses indicate 95% credible  
6 intervals. SUN = sunitinib. PLA = placebo. IFN = interferon- $\alpha$ . SOR = sorafenib. PAZ =  
7 pazopanib. AXI = axitinib. EVE = everolimus. TIV = tivozanib. CAB = cabozantinib. BEV\_IFN  
8 = bevacizumab plus interferon- $\alpha$ . TEM\_BEV = temsirolimus plus bevacizumab. NIV\_IPI =  
9 nivolumab plus ipilimumab.  
10  
11  
12  
13  
14  
15  
16  
17  
18  
19  
20  
21  
22  
23  
24  
25  
26  
27  
28  
29  
30  
31  
32  
33  
34  
35  
36  
37  
38  
39  
40  
41  
42  
43  
44  
45  
46  
47  
48  
49  
50  
51  
52  
53  
54  
55  
56  
57  
58  
59  
60

For peer review only

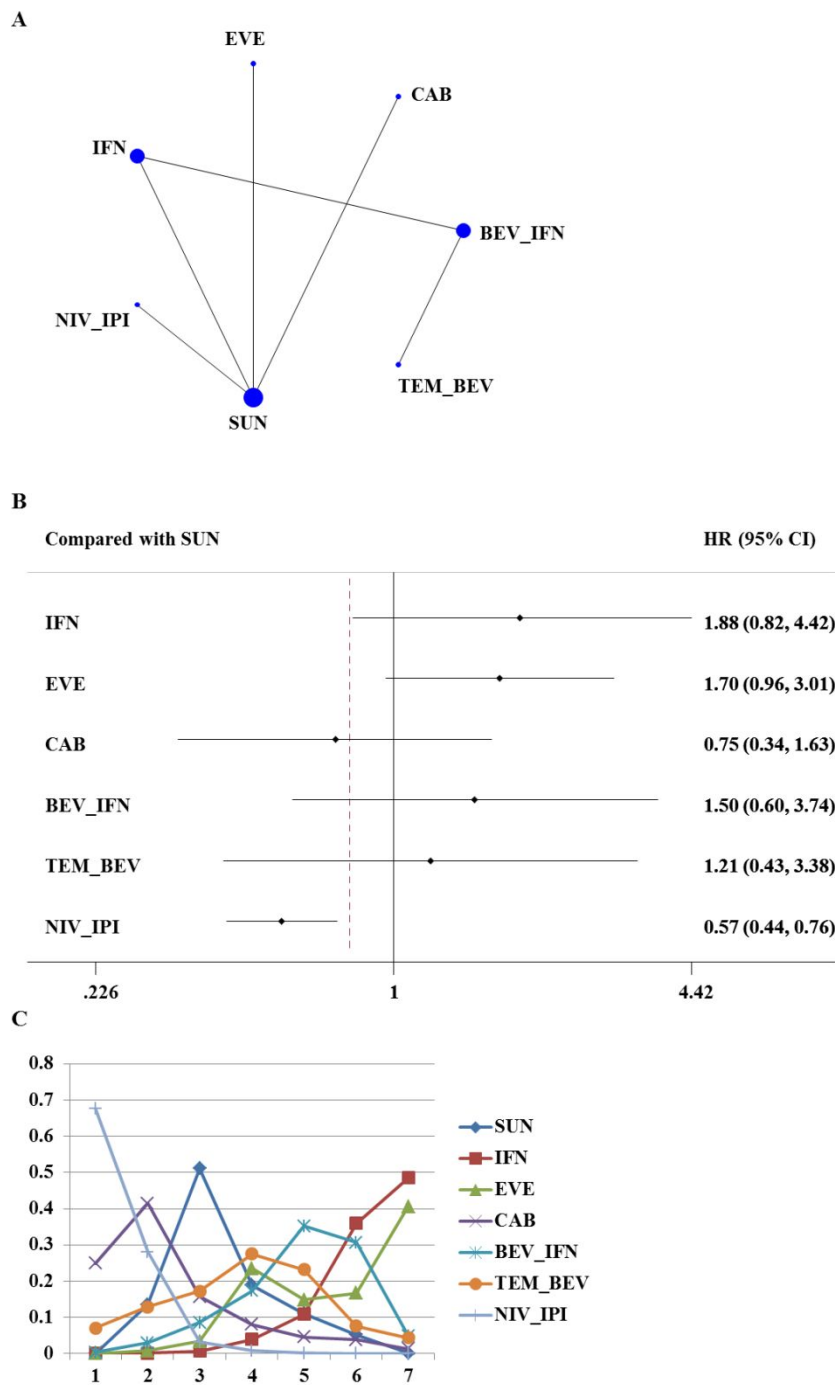

**Fig. 4 - Analysis of progression-free survival for patients with poor-risk disease.** (A) network diagram. (B) forest plot, with sunitinib as the comparator; (C) SUCRA plot.

HR = hazard ratio. CI = confidence interval. Numbers in parentheses indicate 95% credible intervals. SUN = sunitinib. IFN = interferon- $\alpha$ . EVE = everolimus. CAB =

cabozantinib. BEV\_IFN = bevacizumab plus interferon- $\alpha$ . TEM\_BEV = temsirolimus plus bevacizumab. NIV\_IPI = nivolumab plus ipilimumab.

|     |                      |                        |                       |                        |                        |                         |                       |
|-----|----------------------|------------------------|-----------------------|------------------------|------------------------|-------------------------|-----------------------|
| SUN | 0.38<br>(0.02, 8.57) | 2.64<br>(0.06, 155.18) | 1.02<br>(0.13, 9.41)  | 1.84<br>(0.02, 177.32) | 0.91<br>(0.10, 8.90)   | 4.75<br>(0.06, 517.51)  | 0.49<br>(0.06, 4.59)  |
|     | PLA                  | 6.81<br>(0.67, 90.47)  | 2.61<br>(0.31, 23.27) | 4.76<br>(0.19, 130.86) | 2.31<br>(0.05, 101.89) | 12.45<br>(0.50, 408.59) | 1.29<br>(0.03, 56.04) |
|     |                      | SOR                    | 0.39<br>(0.01, 9.42)  | 0.67<br>(0.08, 5.76)   | 0.37<br>(0.00, 26.62)  | 1.75<br>(0.19, 16.73)   | 0.19<br>(0.00, 15.41) |
|     |                      |                        | PAZ                   | 1.75<br>(0.04, 96.67)  | 0.87<br>(0.04, 19.06)  | 4.53<br>(0.09, 270.47)  | 0.49<br>(0.02, 9.84)  |
|     |                      |                        |                       | TIV                    | 0.53<br>(0.00, 62.41)  | 2.48<br>(0.12, 59.27)   | 0.27<br>(0.00, 34.46) |
|     |                      |                        |                       |                        | CAB                    | 4.96<br>(0.04, 907.75)  | 0.56<br>(0.02, 12.11) |
|     |                      |                        |                       |                        |                        | SOR_IL-2                | 0.11<br>(0.00, 13.36) |
|     |                      |                        |                       |                        |                        |                         | NIV_IPI               |

**Fig. 5 - Pooled odds ratios for high-grade adverse events.**

The column treatment is compared with the row treatment. Odds ratios lower than 1 favor the column-defining treatment. Numbers in parentheses indicate 95% credible intervals. SUN = sunitinib. PLA = placebo. SOR = sorafenib. PAZ = pazopanib. TIV = tivozanib. CAB = cabozantinib. SOR\_IL-2= sorafenib plus interleukin-2. NIV\_IPI = nivolumab plus ipilimumab. Stepwise comparison of treatments did not find significant differences in rates of high-grade adverse events.

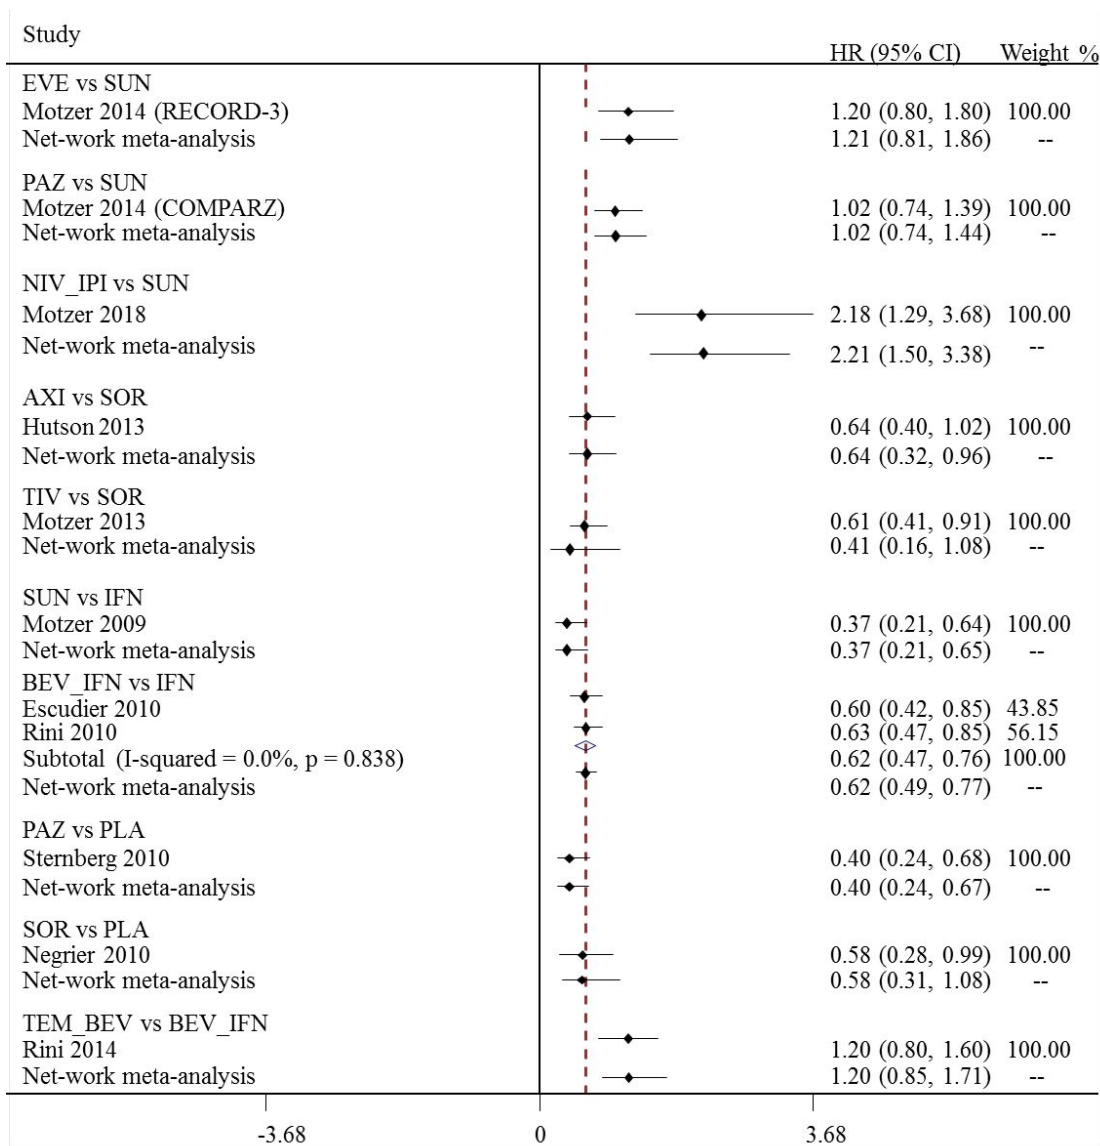

**Fig. 6 - Pooled hazard ratios for progression-free survival by Bayesian network-analysis and traditional meta-analysis**

HR = hazard ratio. CI=confidence interval for traditional meta-analysis and credible interval for Bayesian network meta-analysis. SUN = sunitinib. PLA = placebo. IFN = interferon- $\alpha$ . SOR = sorafenib. PAZ = pazopanib. AXI = axitinib. EVE = everolimus. TIV = tivozanib. BEV\_IFN = bevacizumab plus interferon- $\alpha$ . TEM\_BEV = temsirolimus plus bevacizumab. NIV\_IPI = nivolumab plus ipilimumab.



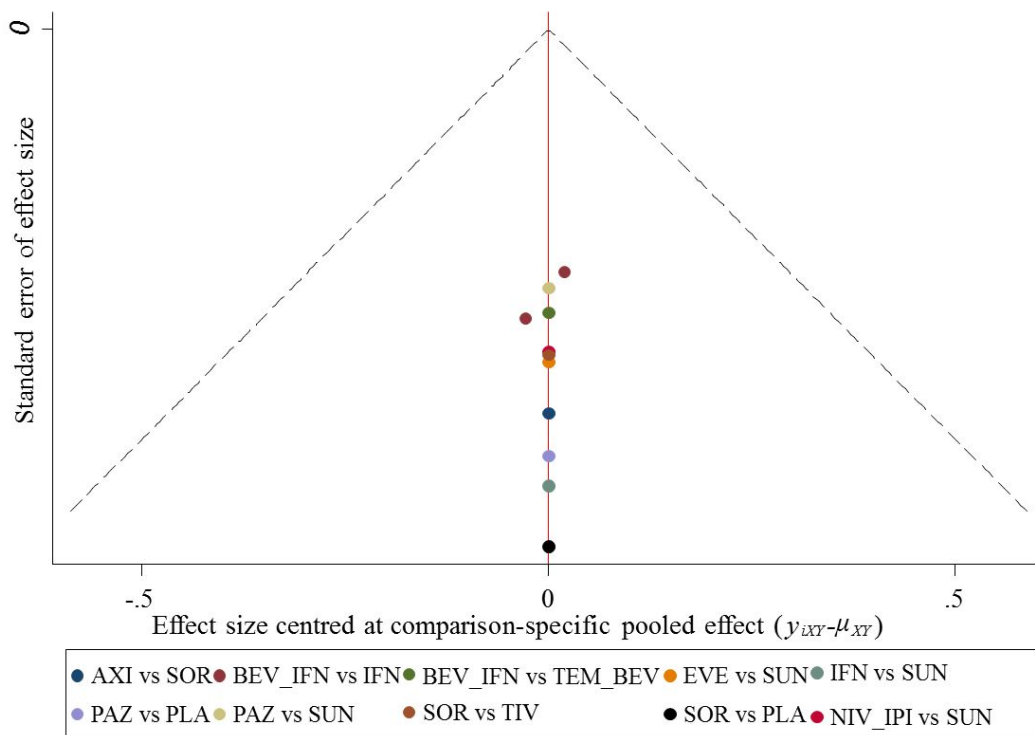

**Fig. 7 - Funnel plot of randomized controlled trials included in the meta-analysis for hazard ratios of progression-free survival**

SUN = sunitinib. PLA = placebo. IFN = interferon- $\alpha$ . SOR = sorafenib. PAZ = pazopanib. AXI = axitinib. EVE = everolimus. TIV = tivozanib. BEV\_IFN = bevacizumab plus interferon- $\alpha$ . TEM\_BEV = temsirolimus plus bevacizumab. NIV\_IPI = nivolumab plus ipilimumab.

## Appendix

### Search strategy

#### Pubmed:

((((((((((((sorafenib[Title/Abstract]) OR sunitinib[Title/Abstract]) OR  
 bevacizumab[Title/Abstract]) OR pazopanib[Title/Abstract]) OR temsirolimus[Title/Abstract])  
 OR everolimus[Title/Abstract]) OR axitinib[Title/Abstract]) OR Cabozantinib[Title/Abstract]) OR  
 IFN-alpha[Title/Abstract]) OR IL-2[Title/Abstract]) OR Nivolumab[Title/Abstract]) OR Immune  
 checkpoint blockade[Title/Abstract])) AND (("Carcinoma, Renal Cell"[Mesh]) OR (((renal  
 cancer[Title]) OR renal carcinoma[Title]) OR kidney cancer[Title]) OR kidney carcinoma[Title]))  
 Filter: Controlled Clinical Trial

#### Cochrane Library:

#1 sorafenib:ti,ab,kw or sunitinib:ti,ab,kw or bevacizumab:ti,ab,kw or  
 temsirolimus:ti,ab,kw or pazopanib:ti,ab,kw (Word variations have been searched)  
 #2 everolimus:ti,ab,kw or afatinib:ti,ab,kw or cabozantinib:ti,ab,kw or IFN:ti,ab,kw or  
 IL-2:ti,ab,kw (Word variations have been searched)  
 #3 nivolumab:ti,ab,kw or Immune checkpoint blockade:ti,ab,kw (Word variations  
 have been searched)  
 #4 MeSH descriptor: [Carcinoma, Renal Cell] explode all trees  
 #5 #1 or #2 or #3  
 #6 #4 and #5, Filter: Trials

#### Web of science

# 1 (((((((((((Topic: (sorafenib) OR Topic: (sunitinib)) OR Topic: (bevacizumab)) OR Topic:  
 (pazopanib)) OR Topic: (temsirolimus)) OR Topic: (everolimus)) OR Topic: (afatinib)) OR Topic:  
 (cabozantinib)) OR Topic: (IFN)) OR Topic: (IL-2)) OR Topic: (nivolumab)) OR Topic: (Immune  
 checkpoint blockade))  
 # 2 Title: (renal cell carcinoma) OR Title: (renal cancer) OR Title: (renal carcinoma) OR Title:  
 (kidney cancer) OR Title: (kidney carcinoma)  
 # 3 #2 AND #1  
 # 4 #2 AND #1 Document Types: CLINICAL TRIAL

1  
2  
3  
4 **ClinicalTrials.gov:**

5 Category: “renal cell carcinoma OR renal cancer OR renal carcinoma OR kidney cancer OR

6 kidney carcinoma, Studies With Results”

7  
8  
9 (<http://clinicaltrials.gov/>)

10  
11  
12  
13  
14  
15  
16  
17  
18  
19  
20  
21  
22  
23  
24  
25  
26  
27  
28  
29  
30  
31  
32  
33  
34  
35  
36  
37  
38  
39  
40  
41  
42  
43  
44  
45  
46  
47  
48  
49  
50  
51  
52  
53  
54  
55  
56  
57  
58  
59  
60

For peer review only

**Appendix figure 1:** Pooled odds ratios for **overall adverse events** by Bayesian network meta-analysis

|     |                       |                       |                       |
|-----|-----------------------|-----------------------|-----------------------|
| SUN | 2.26<br>(0.26, 25.07) | 1.10<br>(0.02, 34.61) | 0.34<br>(0.08, 1.38)  |
|     | PAZ                   | 0.50<br>(0.00, 28.54) | 0.15<br>(0.01, 1.90)  |
|     |                       | CAB                   | 0.30<br>(0.01, 20.92) |
|     |                       |                       | NIV_IPI               |

The column treatment is compared with the row treatment. ORs lower than 1 favor the column-defining treatment. Numbers in parentheses indicate 95% credible intervals. Stepwise comparison of treatments did not find significant differences in rates of overall adverse events. SUN = sunitinib. PAZ = pazopanib. CAB = cabozantinib. NIV\_IPI = nivolumab plus ipilimumab.

Appendix figure 2: Cochrane risk of bias tool assessment

|                             | Random sequence generation (selection bias) | Allocation concealment (selection bias) | Blinding of participants and personnel (performance bias) | Blinding of outcome assessment (detection bias) | Incomplete outcome data (attrition bias) | Selective reporting (reporting bias) | Other bias |
|-----------------------------|---------------------------------------------|-----------------------------------------|-----------------------------------------------------------|-------------------------------------------------|------------------------------------------|--------------------------------------|------------|
| Choueiri 2017               | +                                           | +                                       | -                                                         | +                                               | +                                        | +                                    | ?          |
| Escudier 2010 (AVOREN)      | +                                           | +                                       | +                                                         | +                                               | +                                        | +                                    | ?          |
| Hutson 2013                 | +                                           | +                                       | -                                                         | +                                               | +                                        | +                                    | +          |
| Motzer 2009                 | +                                           | +                                       | -                                                         | ?                                               | +                                        | +                                    | +          |
| Motzer 2013                 | +                                           | +                                       | -                                                         | ?                                               | +                                        | +                                    | ?          |
| Motzer 2014 (COMPARZ)       | +                                           | +                                       | -                                                         | ?                                               | +                                        | +                                    | +          |
| Motzer 2014 (RECORD-3)      | +                                           | ?                                       | -                                                         | ?                                               | +                                        | +                                    | ?          |
| Motzer 2018 (CheckMate 214) | +                                           | +                                       | ?                                                         | +                                               | +                                        | +                                    | ?          |
| Negrier 2010 (TARGET)       | +                                           | +                                       | +                                                         | +                                               | +                                        | +                                    | +          |
| Procopio 2013 (ROSORC)      | +                                           | +                                       | -                                                         | -                                               | +                                        | +                                    | ?          |
| Rini 2010 (CALGB 90206)     | +                                           | +                                       | +                                                         | +                                               | +                                        | +                                    | +          |
| Rini 2014 (INTORACT)        | +                                           | +                                       | -                                                         | +                                               | +                                        | +                                    | +          |
| Sternberg 2010 (VEG105192)  | +                                           | +                                       | +                                                         | +                                               | +                                        | +                                    | ?          |

**Appendix Table 1:** For advanced/metastatic RCC of favorable-risk, comparison of hazard ratios (95% CI) for **progression-free survival** from fixed and random models.

| Treatment compared with SUN | Fixed Model              | Random Model       |
|-----------------------------|--------------------------|--------------------|
| PLA                         | <b>2.63 (1.47-4.71)</b>  | 2.79 (0.005-4812)  |
| IFN                         | <b>2.70 (1.59-4.51)</b>  | 2.57 (0.05-18.24)  |
| SOR                         | 1.47 (0.61-3.59)         | 1.56 (0.001-2735)  |
| PAZ                         | 1.03 (0.74-1.44)         | 1.03 (0.05-142.4)  |
| AXI                         | 0.98 (0.36-2.76)         | 0.95 (0.001-22200) |
| EVE                         | 1.21 (0.81-1.86)         | 1.28 (0.03-66.05)  |
| BEV_IFN                     | 1.66 (0.94 -2.88)        | 1.54 (0.01-24.08)  |
| TEM_BEV                     | <b>1.96 (1.04 -3.63)</b> | 1.92 (0.02-155.90) |
| TIV                         | 0.92 (0.37-2.33)         | 0.96 (0.001-11940) |
| NIV_IPI                     | <b>2.21 (1.50-3.38)</b>  | 2.16 (0.05-52.46)  |
| DIC                         | 6.17                     | 7.53               |

Numbers in parentheses indicate 95% credible intervals. SUN = sunitinib. PLA = placebo. IFN = interferon- $\alpha$ . SOR = sorafenib. PAZ = pazopanib. AXI = axitinib. EVE = everolimus. BEV\_IFN = bevacizumab plus interferon- $\alpha$ . TEM\_BEV = temsirolimus plus bevacizumab. TIV = tivozanib. NIV\_IPI = nivolumab plus ipilimumab. Bold type font indicates significant values.

**Appendix Table 2:** For advanced/metastatic RCC of intermediate-risk, comparison of hazard ratios (95% CI) for **progression-free survival** from fixed and random models.

| Treatment compared with SUN | Fixed Model             | Random Model        |
|-----------------------------|-------------------------|---------------------|
| PLA                         | <b>2.00 (1.28-3.15)</b> | 2.00 (0.01-1366)    |
| IFN                         | <b>2.57 (1.86-3.57)</b> | 2.56 (0.02-283)     |
| SOR                         | 0.96 (0.48-1.92)        | 0.95 (0.002- 5382)  |
| PAZ                         | 0.98 (0.80-1.20)        | 0.98 (0.02- 94.94)  |
| AXI                         | 0.80 (0.35-2.76)        | 0.80 (0.001- 7618)  |
| EVE                         | <b>1.50 (1.11-2.03)</b> | 1.50 (0.02-121.20)  |
| CAB                         | 0.64 (0.43-0.96)        | 0.65 (0.01- 64.02)  |
| BEV_IFN                     | <b>1.68 (1.18-2.40)</b> | 1.60 (0.01- 895.10) |
| TEM_BEV                     | <b>1.85 (1.21-2.81)</b> | 1.81 (0.002- 4299)  |
| TIV                         | 0.77 (0.36-1.65)        | 0.79 (0.001- 15210) |
| NIV_IPI                     | <b>0.66 (0.54-0.81)</b> | 0.67 (0.01- 64.51)  |
| DIC                         | 2.01                    | 2.84                |

Numbers in parentheses indicate 95% credible intervals. SUN = sunitinib. PLA = placebo. IFN = interferon- $\alpha$ . SOR = sorafenib. PAZ = pazopanib. AXI = axitinib. EVE = everolimus. CAB = cabozantinib. BEV\_IFN = bevacizumab plus interferon- $\alpha$ . TEM\_BEV = temsirolimus plus bevacizumab. TIV = tivozanib. NIV\_IPI = nivolumab plus ipilimumab. Bold type font indicates significant values.

**Appendix Table 3:** For advanced/metastatic RCC of poor-risk, comparison of hazard ratios (95% CI) for **progression-free survival** from fixed and random models.

| Treatment compared with SUN | Fixed Model             | Random Model        |
|-----------------------------|-------------------------|---------------------|
| IFN                         | 1.88 (0.82- 4.42)       | 1.88 (0.03- 137.70) |
| EVE                         | 1.70 (0.96- 3.01)       | 1.68 (0.02- 89.46)  |
| CAB                         | 0.75 (0.34-1.64)        | 0.75 (0.01- 54.64)  |
| BEV_IFN                     | 1.50 (0.60-3.74)        | 1.50 (0.01- 344.20) |
| TEM_BEV                     | 1.21 (0.43-3.38)        | 1.22 (0.001- 1196)  |
| NIV_IPI                     | <b>0.57 (0.44-0.76)</b> | 0.57 (0.01- 36.17)  |
| DIC                         | 6.71                    | 8.18                |

Numbers in parentheses indicate 95% credible intervals. SUN = sunitinib. IFN = interferon- $\alpha$ .

EVE = everolimus. CAB = cabozantinib. BEV\_IFN = bevacizumab plus interferon- $\alpha$ . TEM\_BEV

= temsirolimus plus bevacizumab. NIV\_IPI = nivolumab plus ipilimumab. Bold type font

indicates significant values.



**Appendix Table 4:** Comparison of odds ratios (95% CI) for **high-grade adverse event** from consistency and inconsistency models.

| Treatment compared with SUN       | Consistency Model   | Inconsistency Model |
|-----------------------------------|---------------------|---------------------|
| PLA                               | 0.38 (0.02, 8.57)   | 0.39 (0.02, 7.99)   |
| SOR                               | 2.64 (0.06, 155.18) | 2.83 (0.06, 150.54) |
| PAZ                               | 1.02 (0.13, 9.41)   | 1.06 (0.12, 9.30)   |
| TIV                               | 1.84 (0.02, 177.32) | 1.96 (0.02, 182.94) |
| CAB                               | 0.91 (0.10, 8.90)   | 0.94 (0.11, 8.34)   |
| SOR_IL-2                          | 4.75 (0.06, 517.51) | 5.05 (0.05, 509.65) |
| NIV_IPI                           | 0.49 (0.06, 4.59)   | 0.50 (0.06, 4.18)   |
| Random Effects Standard Deviation | 0.83 (0.01, 1.69)   | 0.83 (0.06, 1.70)   |
| Inconsistency Standard Deviation  | NA                  | 0.87 (0.04, 1.70)   |

Numbers in parentheses indicate 95% credible intervals. SUN = sunitinib. PLA = placebo. SOR = sorafenib. PAZ = pazopanib. TIV = tivozanib. CAB = cabozantinib. SOR\_IL-2= sorafenib plus interleukin-2. NIV\_IPI = nivolumab plus ipilimumab. Stepwise comparison of treatments did not find significant differences in rates of high-grade adverse events.

**Appendix Table 5:** Comparison of odds ratios (95% CI) for **overall-grade adverse event** from consistency and inconsistency models.

| Treatment compared with SUN       | Consistency Model  | Inconsistency Model |
|-----------------------------------|--------------------|---------------------|
| PAZ                               | 2.26 (0.26, 25.07) | 2.22 (0.27, 24.99)  |
| CAB                               | 1.10 (0.02, 34.61) | 1.08 (0.02, 41.16)  |
| NIV_IPI                           | 0.34 (0.08, 1.38)  | 0.34 (0.08, 1.41)   |
| Random Effects Standard Deviation | 0.50 (0.02, 1.02)  | 0.53 (0.04, 1.02)   |
| Inconsistency Standard Deviation  | NA                 | 0.53 (0.02, 1.03)   |

Numbers in parentheses indicate 95% credible intervals. SUN = sunitinib. PAZ = pazopanib. CAB = cabozantinib. NIV\_IPI = nivolumab plus ipilimumab. Stepwise comparison of treatments did not find significant differences in rates of overall-grade adverse events.

**Appendix Table 6:** Comparison of results from primary analysis and sensitivity analysis for trials assessing approved targeted drugs.

| Treatment | Primary Analysis<br>PFS HR (95% CI) vs SUN | Sensitivity Analysis<br>PFS HR (95% CI) vs SUN |
|-----------|--------------------------------------------|------------------------------------------------|
| PLA       | <b>2.63 (1.47-4.71)</b>                    | <b>2.55 (1.38 -4.66)</b>                       |
| IFN       | <b>2.70 (1.59-4.51)</b>                    | <b>2.71 (1.55 -4.71)</b>                       |
| SOR       | 1.47 (0.61-3.59)                           | 1.48 (0.62 -3.55)                              |
| PAZ       | 1.03 (0.74-1.44)                           | 1.02 (0.75 -1.41)                              |
| AXI       | 0.98 (0.36-2.76)                           | 0.95 (0.35 -2.54)                              |
| EVE       | 1.21 (0.81-1.86)                           | 1.20 (0.80-1.80)                               |
| BEV_IFN   | 1.66 (0.94 -2.88)                          | 1.67 (0.92 -3.07)                              |
| TEM_BEV   | <b>1.96 (1.04 -3.63)</b>                   | <b>2.00 (1.01 -4.03)</b>                       |
| TIV       | 0.92 (0.37-2.33)                           | NA                                             |
| NIV_IPI   | <b>2.21 (1.50-3.38)</b>                    | <b>2.18 (1.46-3.20)</b>                        |

HR = hazard ratio. CI = confidence interval. Numbers in parentheses indicate 95% credible intervals. SUN = sunitinib. PLA = placebo. IFN = interferon- $\alpha$ . SOR = sorafenib. PAZ = pazopanib. AXI = axitinib. EVE = everolimus. BEV\_IFN = bevacizumab plus interferon- $\alpha$ . TEM\_BEV = temsirolimus plus bevacizumab. TIV = tivozanib. NIV\_IPI = nivolumab plus ipilimumab. Bold type font indicates significant values.

# BMJ Open

**What's the optimum systemic treatment for advanced/metastatic renal cell carcinoma of favorable-, intermediate- and poor-risk, respectively? A systematic review and network meta-analysis**

|                                 |                                                                                                                                                                                                                                                                                                                                                                                                                                                                                                               |
|---------------------------------|---------------------------------------------------------------------------------------------------------------------------------------------------------------------------------------------------------------------------------------------------------------------------------------------------------------------------------------------------------------------------------------------------------------------------------------------------------------------------------------------------------------|
| Journal:                        | <i>BMJ Open</i>                                                                                                                                                                                                                                                                                                                                                                                                                                                                                               |
| Manuscript ID                   | bmjopen-2019-034626.R1                                                                                                                                                                                                                                                                                                                                                                                                                                                                                        |
| Article Type:                   | Original research                                                                                                                                                                                                                                                                                                                                                                                                                                                                                             |
| Date Submitted by the Author:   | 22-Feb-2020                                                                                                                                                                                                                                                                                                                                                                                                                                                                                                   |
| Complete List of Authors:       | Cao, Guanghui; Henan Provincial People's Hospital<br>Wu, Xiaoqiang; Henan Provincial People's Hospital<br>Wang, Zhiwei; Henan Provincial People's Hospital<br>Tian, Xiangyong; Henan Provincial People's Hospital<br>Zhang, Chan; Henan Provincial People's Hospital, Department of Urology<br>Wu, Xuan; Henan Provincial People's Hospital<br>Zhang, Haotian; Henan Provincial People's Hospital<br>Jing, Gaopeng; Henan Provincial People's Hospital<br>Yan, Tianzhong; Henan Provincial People's Hospital, |
| <b>Primary Subject Heading</b>: | Urology                                                                                                                                                                                                                                                                                                                                                                                                                                                                                                       |
| Secondary Subject Heading:      | Oncology                                                                                                                                                                                                                                                                                                                                                                                                                                                                                                      |
| Keywords:                       | Urological tumours < UROLOGY, Kidney tumours < ONCOLOGY, IMMUNOLOGY                                                                                                                                                                                                                                                                                                                                                                                                                                           |
|                                 |                                                                                                                                                                                                                                                                                                                                                                                                                                                                                                               |

SCHOLARONE™  
Manuscripts



I, the Submitting Author has the right to grant and does grant on behalf of all authors of the Work (as defined in the below author licence), an exclusive licence and/or a non-exclusive licence for contributions from authors who are: i) UK Crown employees; ii) where BMJ has agreed a CC-BY licence shall apply, and/or iii) in accordance with the terms applicable for US Federal Government officers or employees acting as part of their official duties; on a worldwide, perpetual, irrevocable, royalty-free basis to BMJ Publishing Group Ltd ("BMJ") its licensees and where the relevant Journal is co-owned by BMJ to the co-owners of the Journal, to publish the Work in this journal and any other BMJ products and to exploit all rights, as set out in our [licence](#).

The Submitting Author accepts and understands that any supply made under these terms is made by BMJ to the Submitting Author unless you are acting as an employee on behalf of your employer or a postgraduate student of an affiliated institution which is paying any applicable article publishing charge ("APC") for Open Access articles. Where the Submitting Author wishes to make the Work available on an Open Access basis (and intends to pay the relevant APC), the terms of reuse of such Open Access shall be governed by a Creative Commons licence – details of these licences and which [Creative Commons](#) licence will apply to this Work are set out in our licence referred to above.

Other than as permitted in any relevant BMJ Author's Self Archiving Policies, I confirm this Work has not been accepted for publication elsewhere, is not being considered for publication elsewhere and does not duplicate material already published. I confirm all authors consent to publication of this Work and authorise the granting of this licence.

1  
2  
3  
4 **What's the optimum systemic treatment for advanced/metastatic**  
5  
6 **renal cell carcinoma of favorable-, intermediate- and poor-risk,**  
7  
8 **respectively? A systematic review and network meta-analysis**  
9  
10  
11  
12

13 Guanghui Cao, Xiaoqiang Wu, Zhiwei Wang, Xiangyong Tian, Chan Zhang, Xuan Wu, Haotian  
14 Zhang, Gaopeng Jing, Tianzhong Yan  
15  
16

17  
18  
19 Department of Urology, Henan Provincial People's Hospital, Zhengzhou University People's  
20 Hospital, Zhengzhou 450003, China;  
21  
22

23  
24  
25 # Correspondence to Prof Tianzhong Yan PhD, Department of Urology, Henan Provincial People's  
26 Hospital, Zhengzhou University People's Hospital, Zhengzhou 450003, China.  
27  
28

29 E-mail address: ytz460@hotmail.com (Tianzhong Yan), wuxiaoqiang2005@126.com (Xiaoqiang  
30 Wu).  
31  
32

33 Tel.: + 86 731 87160355; fax: + 86 431 87160356.  
34  
35  
36  
37  
38  
39  
40  
41  
42  
43  
44  
45  
46  
47  
48  
49  
50  
51  
52  
53  
54  
55  
56  
57  
58  
59  
60

## ***Abstract***

***Purpose:*** The optimum systemic therapies for advanced/metastatic renal cell carcinoma (RCC) of favorable-, intermediate-, and poor-risk have not been established. We aimed to compare and rank the effects associated with systemic therapies in the first-line setting.

***Methods:*** We searched Pubmed, Cochrane databases, Web of Science, and ClinicalTrials.gov for randomized controlled trials (RCTs) published up to February 2020, of all available treatments for advanced/metastatic RCC. Analysis was done on a Bayesian framework.

***Results:*** 15 unique RCTs including 8 995 patients were identified. For advanced/metastatic RCC of favorable-risk, avelumab plus axitinib was associated with a significantly higher improvement in progression-free survival (PFS) than sunitinib (HR 0.57, 95% CI 0.34-0.96). For intermediate-risk patients, cabozantinib, nivolumab plus ipilimumab, pembrolizumab plus axitinib, and avelumab plus axitinib were associated with significantly higher improvement in PFS than sunitinib (HR 0.63, 95% CI 0.44-0.97; HR 0.66, 95% CI 0.53-0.81; HR 0.58, 95% CI 0.44-0.80; HR 0.62, 95% CI 0.47-0.83, respectively); pembrolizumab plus axitinib and nivolumab plus ipilimumab were associated with significantly higher improvement in overall survival (OS) than sunitinib (HR 0.53, 95% CI 0.34-0.81; HR 0.66, 95% CI 0.50-0.87, respectively). For poor-risk patients, nivolumab plus ipilimumab and pembrolizumab plus axitinib were associated with significantly higher improvement in PFS than sunitinib (HR 0.57, 95% CI 0.43-0.76; HR 0.48, 95% CI 0.30-0.82, respectively); nivolumab plus ipilimumab and pembrolizumab plus axitinib were significantly more efficacious for OS than sunitinib (HR 0.57, 95% CI 0.39-0.883; HR 0.43, 95% CI 0.23-0.80, respectively). For OS, there were 81% and 78% probabilities that pembrolizumab plus axitinib was the best option for intermediate-risk and poor-risk patients, respectively.

***Conclusion:*** Avelumab plus axitinib might be the optimum treatment for advanced/metastatic RCC of favorable-risk. Pembrolizumab plus axitinib might be the optimum treatment for intermediate-risk and poor-risk patients.

1  
2  
3  
4  
5 **Keywords:** renal cell carcinoma; systemic therapies; risk stratification; efficacy;  
6  
7 safety.  
8  
9

### 10 11 **Strengths and limitations of this study** 12

- 13 ▶ This is the first network analysis to compare systemic treatments for  
14 advanced/metastatic RCC separately by risk groups.  
15
- 16 ▶ Various statistical models were applied to synthesize data. The reliability and  
17 accuracy of results were corroborated by the low statistical heterogeneity and  
18 excellent model fit.  
19
- 20 ▶ Assessment of both efficacy and adverse events provides new insights into the  
21 benefit-harm balance of different systemic treatments.  
22
- 23 ▶ Main limitation lies in the reporting quality of trials included.  
24  
25  
26  
27  
28  
29  
30  
31  
32  
33  
34  
35  
36  
37  
38  
39  
40  
41  
42  
43  
44  
45  
46  
47  
48  
49  
50  
51  
52  
53  
54  
55  
56  
57  
58  
59  
60



## 1. Introduction

Renal cell carcinoma (RCC) comprises approximately 90% of renal cancer, and represents approximately 2-3% of all new cancers worldwide [1]. It was estimated that there would be 62 700 new cases of renal cancer and 14 240 renal cancer-related deaths in the United States in 2016 [2]. In the European Union, new renal cancer cases and deaths in 2012 were approximately 84 400 and 34 700, respectively [3]. Up to 30% of patients were presented with advanced /metastatic RCC at the time of initial diagnosis [4 5]. Advanced/metastatic RCC is not a single condition, but is actually a heterogeneous group of conditions with different prognosis. The most widely accepted prognostic model is from the Memorial Sloan Kettering Cancer Center (MSKCC) and stratifies patients into favorable-, intermediate-, and poor-risk groups depending on the existence of well-characterized laboratory and clinical risk factors. The 2-year survival rates were 45%, 17%, and 3% for favorable-, intermediate-, and poor-risk groups, respectively [6]. In this systematic review, we focus on favorable-, intermediate-, and poor-risk patients with advanced/metastatic RCC.

In recent years, systemic treatment for advanced/metastatic RCC has changed from cytokines to drugs targeting angiogenesis. In 2007, results from two RCTs have been published reporting progress-free survival improvement of two newer targeted agents (sunitinib and sorafenib)[7 8]. To date, eight targeted drugs have been approved for treating advanced/metastatic RCC both in USA and Europe: five tyrosine kinase inhibitors (TKIs): sunitinib, sorafenib, pazopanib, cabozantinib, and axitinib; two mammalian target of rapamycin (mTOR) complex 1 kinase inhibitors: temsirolimus, and everolimus; and the recombinant humanized antivascular endothelial growth factor (VEGF) monoclonal antibody bevacizumab combined with interferon- $\alpha$  (IFN- $\alpha$ ). All eight targeted drugs showed significant survival benefit in randomized trials and established a prominent role in treating advanced/metastatic RCC [7 9-15]. More recently, immune checkpoint antibodies have introduced a new treatment option. CheckMate 214 reported that nivolumab plus ipilimumab was associated with a significantly higher overall survival than sunitinib in the first-line setting [16]. To further improve their efficacy, the combination of different classes of agents is

1  
2  
3  
4 currently evaluated in clinical trials [17-20]. However, there are insufficient  
5  
6 head-to-head RCTs to directly investigate the comparative effectiveness of all  
7  
8 available therapies. Given the variety of treatment options for patients  
9  
10 advanced/metastatic RCC and the limited evidence regarding the optimum treatment  
11  
12 strategy, it is a challenge for clinicians to make the best decision.

13  
14 In the present study, we performed a Bayesian network meta-analysis to compare  
15  
16 first-line systemic treatments for advanced/metastatic RCC of favorable-,  
17  
18 intermediate-, and poor-risk, respectively. Network meta-analysis enables indirect  
19  
20 comparisons based on a common comparator treatment when a head-to-head trial is  
21  
22 unavailable and integrates direct and indirect comparisons to compare several  
23  
24 treatment strategies while fully respecting randomization [21 22]. We aimed to  
25  
26 summarize and compare the efficacy and safety associated with currently available  
27  
28 systemic therapies for treating advanced/metastatic RCC of different risk categories  
29  
30 using network meta-analysis.

## 31 32 33 **2. Methods**

### 34 35 *2.1. Literature-search strategy*

36  
37 A comprehensive literature search was performed in Pubmed, Web of Science,  
38  
39 ClinicalTrials.gov, and Cochrane databases for RCTs of systemic therapies of  
40  
41 advanced/metastatic RCC (appendix for all search terms). All the reference lists of  
42  
43 identified trials and related reviews were examined to find potential trials. The search  
44  
45 was conducted in February 2020. There were no publication date or language  
46  
47 restrictions.

### 48 49 50 *2.2. Inclusion and exclusion criteria*

51  
52 All studies were selected according to the search strategy based on Preferred  
53  
54 Reporting Items for Systematic Reviews and Meta-analyses criteria [23]. Studies were  
55  
56 included if they satisfied three criteria: (1) the study enrolled patients who had  
57  
58 histologically or cytologically confirmed advanced/metastatic RCC of favorable-,  
59  
60 intermediate-, or poor-risk; (2) patients were randomly assigned to receive systemic

1  
2  
3  
4 therapies alone or in combination. Relevant interventions included, but were not  
5 restricted to: sorafenib, sunitinib, pazopanib, cabozantinib, nivolumab, ipilimumab,  
6 axitinib, tivozanib, everolimus, temsirolimus, or bevacizumab plus IFN- $\alpha$ . Previous  
7 systemic therapy for advanced/metastatic RCC was not allowed; (3) one or more of  
8 the outcomes of interest mentioned below were reported. Nonoriginal articles,  
9 duplicate reports and non-RCTs were excluded.  
10  
11  
12  
13  
14  
15  
16

### 17 *2.3. Data Extraction and Quality Assessment*

18  
19 Two researchers (GH. Cao and XQ. Wu) examined the manuscripts of included  
20 trials independently, and extracted data into a structured form, including patient  
21 characteristics, treatment strategies, and interest outcomes [progress free survival  
22 (PFS), overall survival (OS), high-grade (grade  $\geq 3$ ) and overall drug-related adverse  
23 events]. We gave priority to extracting data from intention-to-treat analyses. The  
24 methodological quality of included RCTs was assessed using the Cochrane risk of  
25 bias assessment tool [24]. Disagreement between investigators was resolved by  
26 consensus.  
27  
28  
29  
30  
31  
32  
33  
34  
35  
36

### 37 *2.4. Data synthesis and analysis*

38  
39 First, we performed traditional meta-analyses to compare the treatments using Stata  
40 v.12 (StataCorp, College Station, TX, USA). We applied the chi-square test and the  $I^2$   
41 statistic to investigate the possibility of heterogeneity among studies. A P value  $< 0.10$   
42 or an  $I^2 > 50\%$  suggested the presence of substantial heterogeneity.  
43  
44  
45

46  
47 Second, we did Bayesian network meta-analyses. For meta-analysis of PFS and OS,  
48 the reported adjusted hazard ratios (HRs) with 95% CIs were applied as the outcome  
49 measure. For studies not reporting HRs, we calculated them from Kaplan-Meier curve  
50 and information on follow-up with the pragmatic approach reported by Tierney et al  
51 [25]. For drug-related adverse events, we calculated odds ratios (ORs) using the  
52 available raw data abstracted from the trials. Both random-effects and fixed-effects  
53 models were performed for the analyses [26]. Goodness of model fit was assessed  
54 using the deviance information criterion and between-study standard deviation [26  
55  
56  
57  
58  
59  
60

1  
2  
3  
4 27]. Convergence was determined graphically according to the method described by  
5  
6 Gelman *et al* [28].

7  
8 It is believed that certain systemic treatments are effective in certain risk groups  
9  
10 than others, for example sunitinib is more effective in favorable-risk patients and  
11  
12 nivolumab plus ipilimumab is more effective in intermediate and poor-risk patients  
13  
14 [29], suggesting that there is a treatment-by-risk group (favorable-, intermediate-, and  
15  
16 poor-risk groups) interaction. Taking no account of this possible interaction in the  
17  
18 analysis, transitivity assumption across all included trials would be violated.  
19  
20 Therefore, we performed all network analyses separately by risk groups (favorable-,  
21  
22 intermediate-, and poor-risk groups) according to the MSKCC or IMDC risk model to  
23  
24 assure transitivity assumption.

25  
26 One key assumption for network analysis is that direct and indirect comparisons do  
27  
28 not disagree beyond chance [26 30]. To explore for evidence of inconsistency in the  
29  
30 network, investigators compared the estimated treatment effects from the entire  
31  
32 network with traditional pair-wise estimates [30]. Sensitivity analyses were performed  
33  
34 restricted to trials that assessed approved systemic therapies (sunitinib, sorafenib,  
35  
36 pazopanib, cabozantinib, axitinib, everolimus, temsirolimus, bevacizumab plus IFN- $\alpha$ ,  
37  
38 and nivolumab plus ipilimumab). Publication bias and small-study effects were  
39  
40 assessed using funnel plots [31].

41  
42 We performed the Bayesian network analysis using OpenBUGS version 3.2.2 for  
43  
44 PFS, and Gemtc version 0.14.3 (van Valkenhoef *et al*, 2012) for adverse events. For  
45  
46 PFS, we applied 15 000 iterations obtained after a training phase of 10 000-iteration.  
47  
48 In order to minimize autocorrelation, we applied a thinning interval of 50 for each  
49  
50 chain. For adverse events, we applied the 60 000 iterations after a training phase of 40  
51  
52 000 iterations. The treatments were ranked in terms of PFS, OS, and high-grade AEs,  
53  
54 respectively, using the surface under the cumulative ranking curve (SUCRA) and the  
55  
56 distribution of the ranking probabilities [32].  
57  
58  
59  
60

### 3. Results

#### 3.1. Search results and study characteristics

The literature search yielded 2 017 potentially eligible studies, of which 1 873 were excluded based on screening titles and abstracts (Fig. 1). The full text of 144 remaining studies were analyzed, and finally 21 publications reporting 15 unique RCTs were included (Table), involving 8 995 participants randomly assigned to one of the 13 treatment strategies: sorafenib, sunitinib, pazopanib, cabozantinib, nivolumab plus ipilimumab, axitinib, tivozanib, everolimus, IFN- $\alpha$ , bevacizumab plus IFN- $\alpha$ , temsirolimus plus bevacizumab, avelumab plus axitinib, and pembrolizumab and axitinib. According to the MSKCC or IMDC criteria, there were 2 783, 5 474 and 721 participants had favorable-, intermediate-, and poor-risk disease, respectively.

The main characteristics of included RCTs are summarized in Table. The demographic characteristics of patients were well balanced across trials. Enrolled patients across trials were similar in terms of age, gender, and risk classification. Across trials, the median age of patients ranged from 58 to 64 years. The participants were predominantly male (71.7%, 6 451 of 8 995). The included trials were designed similarly. Median follow-up ranged from 10.7 to 58 months. The mean sample sizes were 100, 192 and 32 patients per group for favorable-, intermediate- and poor-risk subtypes, respectively. Thirteen trials selected for clear-cell carcinoma subtypes [10-12 15 16 33-40], and two trials also included small subsets of non-clear-cell histotypes, each comprising 11% and 14% of the study population, respectively [41 42]. All studies were two-arm trials. The dosages used in most of trials were within the recommended dose ranges.

In this network meta-analysis, results are reported based on fixed-effects models because they demonstrated better goodness of fit compared with random-effects models. The results of random-effects models are available in appendix Table 1-5.

#### 3.2. Progression-free survival

3.2.1. For advanced/metastatic RCC of favorable-risk, 13 trials enrolling 2 514 total

1  
2  
3  
4 patients reported adequate information on progression-free survival and contributed to  
5 network meta-analysis (Fig. 2A)[10-13 15 16 34-37 39-42]. Fig. 2B summarizes the  
6 results of the network meta-analysis for PFS. Compared with sunitinib, IFN- $\alpha$  and  
7 nivolumab plus ipilimumab were associated with significantly worse PFS (HR 2.69,  
8 95% CI 1.54-4.67; and HR 2.18, 95% CI 1.47-3.25, respectively). Network  
9 meta-analysis showed that only avelumab plus axitinib was associated with a  
10 significantly higher improvement in PFS than sunitinib (HR 0.57, 95% CI 0.34-0.96).  
11 Based on the results of ranking, there was a 45% chance that avelumab plus axitinib  
12 provided the greatest PFS benefit for patients with favorable-risk disease (SUCRA =  
13 92.3%)(Fig. 2C).  
14  
15  
16  
17  
18  
19  
20  
21  
22  
23  
24

25 3.2.2. For advanced/metastatic RCC of intermediate-risk, 14 trials enrolling 5 473  
26 total patients contributed to the analysis of PFS (Fig. 3A) [10-13 15 16 33-37 39 40  
27 42]. Network meta-analysis demonstrated that cabozantinib, nivolumab plus  
28 ipilimumab, pembrolizumab plus axitinib, and avelumab plus axitinib were associated  
29 with significantly higher improvement in PFS than sunitinib (HR 0.63, 95% CI  
30 0.44-0.97; HR 0.66, 95% CI 0.53-0.81; HR 0.58, 95% CI 0.44-0.80; HR 0.62, 95% CI  
31 0.47-0.83, respectively). Everolimus, bevacizumab plus IFN- $\alpha$ , and temsirolimus plus  
32 bevacizumab were significantly less efficacious for PFS than sunitinib (HR 1.50, 95%  
33 CI 1.11-2.01; HR 1.69, 95% CI 1.18-2.41; HR 1.88, 95% CI 1.22-2.81, respectively)  
34 (Fig. 3B). Based on the analysis of ranking, pembrolizumab plus axitinib had the  
35 highest probability (49%) to be the best treatment for intermediate-risk patients  
36 (SUCRA = 90.7%). Avelumab plus axitinib and cabozantinib had a similar likelihood  
37 of being the second-best option for patients with intermediate-risk disease (Fig. 3C).  
38  
39  
40  
41  
42  
43  
44  
45  
46  
47  
48  
49  
50

51 3.2.3. Based on data that was available for advanced/metastatic RCC of poor-risk, the  
52 network involved seven trials comparing nine different treatments (721 total patients;  
53 Fig. 4A) [15 16 33-35 37 39 40 42]. Network meta-analysis demonstrated that  
54 nivolumab plus ipilimumab and pembrolizumab plus axitinib were associated with  
55 significantly higher improvement in PFS than sunitinib (HR 0.57, 95% CI 0.43-0.76;  
56  
57  
58  
59  
60

1  
2  
3  
4 HR 0.48, 95% CI 0.30-0.82, respectively) (Fig. 4B). On the base of ranking analysis,  
5  
6 there was a 60% probability that pembrolizumab plus axitinib had the greatest PFS for  
7  
8 poor-risk patients (SUCRA = 91.3%) (Fig. 4C).  
9

### 10 11 3.3. Overall survival

12  
13 Five RCTs reported OS according to risk subgroups, and data from three of them  
14  
15 contributed to the network meta-analysis (572, 1801, and 407 patients for favorable-,  
16  
17 intermediate-, and poor-risk, respectively)[16 38 39]. For advanced/metastatic RCC of  
18  
19 favorable-risk, there is no significant OS benefit between sunitinib and pazopanib  
20  
21 (HR 0.88, 95% CI 0.64-1.21) or pembrolizumab plus axitinib (HR 0.64, 95% CI  
22  
23 0.24-1.70) (Fig. 5A). For intermediate-risk patients, pembrolizumab plus axitinib and  
24  
25 nivolumab plus ipilimumab were associated with significantly higher improvement in  
26  
27 OS than sunitinib (HR 0.53, 95% CI 0.34-0.81; HR 0.66, 95% CI 0.50-0.87,  
28  
29 respectively)(Fig. 5B). For advanced/metastatic RCC of poor-risk, pembrolizumab  
30  
31 plus axitinib and nivolumab plus ipilimumab were significantly more efficacious for  
32  
33 OS than sunitinib (HR 0.43, 95% CI 0.23-0.80; HR 0.57, 95% CI 0.39-0.83,  
34  
35 respectively) (Fig. 5C). Based on the results of ranking, there were 81% and 78%  
36  
37 probabilities for pembrolizumab plus axitinib to be the best choice for intermediate-  
38  
39 and poor-risk patients, respectively (SUCRA =93.1% ; SUCRA= 91.4%, respectively)  
40  
41 (appendix Fig.1-3).  
42  
43  
44

### 45 3.4. Adverse events

46  
47 Nine trials contributed to our analysis of overall and high-grade drug-related adverse  
48  
49 events [10 11 13 15 16 36 39-41]. All the nine trials did not provide adverse events  
50  
51 data for different risk groups, so we extracted a summary of adverse event data.  
52  
53 Results of comparisons of adverse events of nine systemic treatments are presented in  
54  
55 Fig. 6 and appendix Fig. 4 Stepwise comparison of all the seven therapies did not find  
56  
57 significant differences in rates of high-grade or overall adverse events. The most  
58  
59 common adverse events included diarrhea, hypertension, fatigue, and decreased  
60  
61 appetite.

### 3.5. Network assumptions, sensitivity analysis, publication bias, and risk of bias

Consistencies between direct and indirect evidence were noted for any comparisons (appendix Fig. 5 and appendix Table 1-5). Results from the sensitivity analyses were in line with the primary analysis (appendix Table 6). The comparison-adjusted funnel plot (Fig. 7) for PFS was largely symmetric, indicating no obvious small-study effects and publication bias. The methodological quality was moderate in the included studies (appendix Fig. 6). All trials were thought to have low risk of bias for random sequence generation, incomplete outcome data, and selective reporting of outcomes. Ten trials had evidence of high risk of bias for masking [12 13 15 35-37 39-42].

## 4. Discussion

Our network meta-analysis of 15 RCTs including 8 995 individuals assessed the efficacy and safety of all major systematic therapies for the treatment of advanced/metastatic RCC in the first-line setting. Findings of this meta-analysis might help to choose among systemic agents for the management of patients with previously untreated advanced/metastatic RCC. In terms of PFS, avelumab plus axitinib was most likely to be the best treatment regimen for advanced/metastatic RCC of favorable-risk, and pembrolizumab plus axitinib seemed to be the most efficacious treatment strategy for patients with intermediate- and poor-risk. In terms of OS, there were no significant differences among systematic therapies for advanced/metastatic RCC of favorable-risk, and pembrolizumab plus axitinib was probably to be the best option for patients with intermediate- and poor-risk. In terms of drug-related adverse events, there were no significant differences among systemic therapies.

In RCC with clear cell subtype, hypoxia-inducible factor (HIF) accumulation due to loss of von Hippel-Lindau (VHL) leads to overexpression of VEGF and platelet derived growth factor (PDGF), which promotes tumor angiogenesis [43 44]. This process substantially makes a contribution to the development and progression of clear cell RCC. Inhibiting the VEGF signaling has been supposed as the key mechanism for antitumor effects in clear cell RCC. To date, eight targeted drugs have



1  
2  
3  
4 been approved for treating advanced RCC: sunitinib, sorafenib, pazopanib,  
5 cabozantinib, axitinib, everolimus, temsirolimus, and bevacizumab (in combination  
6 with IFN- $\alpha$ ).  
7

8  
9 As shown in this analysis, for patients with intermediate-risk, sunitinib resulted in a  
10 significant PFS benefit compared with everolimus. The varied clinical benefit could  
11 be associated with mechanisms of action of TKI and mTOR inhibitor. Sunitinib not  
12 only inhibit VEGF receptors -1, -2, and -3, which may be the most clearly relevant  
13 targets in RCC so far, but also exhibit potent activity against PDGF receptor [11 45]. It  
14 has been reported that PDGF plays a critical role in the recruitment of pericytes to  
15 sprouting tumor vessels, and pericyte-covered vessels are more likely resistant to  
16 anti-vascular therapy than those pericyte-negative vessels [46 47]. The mTOR  
17 complex is the upstream of an intracellular signaling network regulating cell growth  
18 and angiogenesis, and it plays a key role in the pathogenesis of advanced/metastatic  
19 RCC [48]. It has been demonstrated that rapamycin analogs, including everolimus and  
20 temsirolimus, inhibit only one of two signaling complexes of mTOR [49]. The  
21 mTORC1 signaling is potently inhibited by everolimus and temsirolimus, while the  
22 mTORC2 signaling is not [50]. Consequently, one downstream signaling of mTOR  
23 activation is unopposed. The relatively unsatisfactory efficacy should disable the  
24 mTOR inhibitors as more suitable therapies for the treatment of advanced/metastatic  
25 RCC than TKIs. Regarding TKIs, our results suggest that sunitinib was most likely to  
26 be the best treatment regimen for patients with favorable-risk disease.  
27  
28

29  
30 A potentially additive benefit from combinations of targeted drugs has been  
31 suggested on the basis that they inhibit separate cellular pathways. However, our  
32 results show that temsirolimus plus bevacizumab, and bevacizumab plus IFN- $\alpha$   
33 provide little survival benefit compared with sunitinib, further confirming absence of  
34 evidence that combination treatment simultaneously inhibiting both VEGF and  
35 mTOR signaling results in therapeutic synergy [18 20 37].  
36  
37

38  
39 Immune checkpoint antibodies block the inhibitory T-cell receptor programmed  
40 death-1 (PD-1) or cytotoxic T-lymphocyte antigen 4 (CTLA-4)-signaling to augment  
41 tumor specific immune response [51]. Nivolumab (an anti-PD-1 antibody) is  
42  
43  
44  
45  
46  
47  
48  
49  
50  
51  
52  
53  
54  
55  
56  
57  
58  
59  
60

1  
2  
3  
4 approved for the treatment of advanced RCC in the second line setting. Ipilimumab  
5 (an anti-CTLA-4 antibody) is approved for the treatment of advanced melanoma.  
6  
7 Nivolumab plus ipilimumab has been reported significant efficacy in multiple tumor  
8  
9 types [52-53]. In this analysis, pembrolizumab plus axitinib appeared to be the  
10  
11 optimum treatment for intermediate- and poor-risk patients. Single-agent anti-tumor  
12  
13 activity of pembrolizumab and axitinib for mRCC has been reported in previous  
14  
15 studies [12-54]. Accordingly, axitinib in combination with pembrolizumab was  
16  
17 assessed and contributed to objective response rate in 73% patients in a phase 1b trial  
18  
19 [55]. Our result was consistent with results of KEYNOTE-426 trial, demonstrating  
20  
21 that pembrolizumab plus axitinib resulted in significant OS and PFS benefit compared  
22  
23 with sunitinib [39]. In addition, the survival benefit of pembrolizumab plus axitinib  
24  
25 was observed independent of PD-L1 status [39].  
26

27 Pembrolizumab plus axitinib is a combination of anti-PD-1 monoclonal antibody  
28  
29 and VEGF receptor TKI. Immune checkpoint inhibitors (ICI) block the inhibitory  
30  
31 T-cell receptor PD-1 or CTLA-4-signaling to augment tumor specific immune  
32  
33 response [51]. Besides of antiangiogenic effects, VEGF inhibition could enhance the  
34  
35 recruitment and infiltration of immune cells into the tumors [56-57]. It's reported that  
36  
37 simultaneous blockade of PD-1 and VEGF receptor-2 induced decreased tumor  
38  
39 neovascularization and tumor inhibition in a murine model [58]. These studies  
40  
41 suggested that the combination of ICI and VEGF receptor inhibitors could provide  
42  
43 enhanced benefit for mRCC. Recently, in addition to pembrolizumab plus axitinib,  
44  
45 avelumab (anti-PD-L1 antibody) plus axitinib, and atezolizumab (anti-PD-L1  
46  
47 antibody) plus bevacizumab were respectively assessed in two phase 3 RCTs  
48  
49 (IMmotion 151 and JAVELIN Renal 101), and both of them showed significant  
50  
51 survival benefit for mRCC compared with sunitinib [39-59]. However, there is no  
52  
53 head-to-head trial comparing combinations of ICI and VEGF receptor inhibitors  
54  
55 inhibitors (pembrolizumab plus axitinib, avelumab plus axitinib, and atezolizumab plus  
56  
57 bevacizumab) directly. In consistent with our previous study, the present analysis  
58  
59 revealed that pembrolizumab plus axitinib presented the highest OS benefit for  
60  
intermediate- and poor-risk patients. For advanced/metastatic RCC of favorable-risk,

1  
2  
3  
4 only avelumab plus axitinib was associated with a significantly higher improvement  
5 in PFS than sunitinib, suggesting avelumab plus axitinib might be the optimum  
6 treatment for favorable-risk patients. Considering patients continued to be followed  
7 for OS in the JAVELIN Renal 101 trial [40], the real OS benefit for avelumab plus  
8 axitinib over sunitinib requires additional follow-up.  
9  
10  
11  
12

13 Recently, several network meta-analyses were attempted to investigate the  
14 comparative effects of different systemic agents for treatment of advanced/metastatic  
15 RCC [60-63]. However, trials included in the meta-analyses enrolled patients with  
16 different risk groups. The analysis used aggregate data and did not perform subgroup  
17 analysis based on risk strata. In the present study, we performed a network  
18 meta-analysis to compare first-line systemic treatments for advanced/metastatic RCC  
19 of favorable-, intermediate-, and poor-risk, respectively, thus providing physicians  
20 with the optimal treatment for different risk groups.  
21  
22  
23  
24  
25  
26  
27  
28

29 The strengths of our study are as follows. To the best of our knowledge, this study  
30 is the first network analysis to compare systemic treatments for advanced/metastatic  
31 RCC separately by risk groups. We applied multiple rigorous search strategies to  
32 retrieve all potentially eligible RCTs. In the present study, we comprehensively  
33 compared and ranked all available first-line systemic therapies for  
34 advanced/metastatic RCC of favorable-, intermediate-, and poor-risk, respectively,  
35 thus providing physicians with an overall appraisal of systemic therapies for different  
36 risk groups. In addition, we used Bayesian network meta-analysis to synthesize data.  
37 This approach provides indirect effect estimates in the absence of head-to-head trial  
38 and incorporates all available information from RCTs while fully maintaining  
39 randomization [21 22]. We applied various statistical models to increase reliability of  
40 the results. Results were consistent across all analyzed outcomes. Moreover, the  
41 reliability and accuracy of results were corroborated by the low statistical  
42 heterogeneity and excellent model fit. Finally, assessment of both efficacy and  
43 adverse events provides new insights into the benefit-harm balance of different  
44 systemic treatments.  
45  
46  
47  
48  
49  
50  
51  
52  
53  
54  
55  
56  
57  
58  
59  
60

However, the limitations of our study must be taken into account. The major

1  
2  
3  
4 limitation of this network meta-analysis lies in the reporting quality of trials reviewed.  
5  
6 Ten included trials were not masked, which might affect the validity of our findings.  
7  
8 In addition, three included trials (CABOSUN, ROSORC, and RECORD-3) are phase  
9  
10 2 RCTs with smaller sample size, and they may be less authoritative compared with  
11  
12 phase 3 RCTs. Moreover, most of the trials did not perform the analysis of OS in risk  
13  
14 subgroup, which made it impossible to assess the OS benefits of all the existing  
15  
16 treatments for different risk patients. In addition, this meta-analysis was conducted  
17  
18 based on summary statistics rather than individual patient level data. There might be  
19  
20 some confounding factors (*e.g.*, ethnic origin, prior nephrectomy, *etc.*) at the  
21  
22 individual patient level that might influence the benefit of systemic treatments, but  
23  
24 were not available; therefore analyses adjusted for these factors were impossible in  
25  
26 our network meta-analysis. Access to patient-level longitudinal data would allow us to  
27  
28 establish more robust and accurate conclusions in specific subgroups of patients.  
29  
30 Moreover, the length of follow-up varied across studies, resulting in potential  
31  
32 variations in survival benefits and adverse events. Due to only eight trials reporting  
33  
34 median follow-up, sensitivity analyses adjusted for this factor were impossible.  
35  
36 Moreover, individual dosage varied across studies and data were too sparse to  
37  
38 investigate effects of different schedules, which might somewhat affect the  
39  
40 generalisability of our findings. Since the analysis was based on highly selected RCTs  
41  
42 and the results were based on fixed-effects models, findings in this analysis may not  
43  
44 be entirely generalized to real-world practice. Finally, findings in this meta-analysis  
45  
46 were mainly based on patients with clear-cell advanced RCC, thus no robust  
47  
48 recommendations can be provided for non-clear-cell subtypes. Two trials included  
49  
50 small subsets of non-clear-cell histotypes (11% and 14% of the study population),  
51  
52 which might somewhat damage the results of our analysis.  
53

## 54 **5. Conclusions**

55  
56 Our network meta-analysis suggested that: avelumab plus axitinib might be the  
57  
58 optimum treatment for advanced/metastatic RCC of favorable-risk; pembrolizumab  
59  
60 plus axitinib was most likely to be the best option for intermediate- and poor-risk

1  
2  
3  
4 patients. Further well-designed, large-scale RCTs are required to confirm and update  
5 the findings of this analysis.  
6  
7  
8  
9

### 10 11 **Author Contributions**

12 G-HC and X-QW conceived and designed the meta-analysis, Z-ZW and X-YT  
13 identified and acquired reports of trials, and extracted data. XW and H-TZ analyzed  
14 and interpreted the data. CZ and G-PJ contacted authors of trials for additional  
15 information. G-HC and X-QW drafted the manuscript. T-ZY critically reviewed the  
16 manuscript. All authors approved the final submitted version of the report.  
17  
18  
19  
20  
21  
22

23  
24  
25 **Fundings:** This research was supported by the Henan Provincial Medical Scientific  
26 and Technological Research Project (Grant No. 201702191). The sponsor had no role  
27 in study design, data collection, data analysis, data interpretation, or writing of the  
28 report.  
29  
30  
31  
32

33  
34  
35 **Conflicts of Interest:** None declared.  
36  
37

### 38 39 **Data Availability Statement**

40 All data relevant to the study are included in the article or uploaded as supplementary  
41 information.  
42  
43  
44  
45

### 46 47 **Patient and Public Involvement**

48 Patients or the public WERE NOT involved in the design, or conduct, or reporting, or  
49 dissemination of our research.  
50  
51  
52  
53  
54  
55  
56  
57  
58  
59  
60

**References:**

1. Ljungberg B, Bensalah K, Canfield S, et al. EAU guidelines on renal cell carcinoma: 2014 update. *Eur Urol* 2015;67(5):913-24.
2. Siegel RL, Miller KD, Jemal A. Cancer statistics, 2016. *CA Cancer J Clin* 2016;66(1):7-30.
3. Ferlay J, Steliarova-Foucher E, Lortet-Tieulent J, et al. Cancer incidence and mortality patterns in Europe: estimates for 40 countries in 2012. *Eur J Cancer* 2013;49(6):1374-403.
4. Janzen NK, Kim HL, Figlin RA, et al. Surveillance after radical or partial nephrectomy for localized renal cell carcinoma and management of recurrent disease. *Urol Clin North Am* 2003;30(4):843-52.
5. Cohen HT, McGovern FJ. Renal-cell carcinoma. *N Engl J Med* 2005;353(23):2477-90.
6. Motzer RJ, Bacik J, Murphy BA, et al. Interferon-Alfa as a Comparative Treatment for Clinical Trials of New Therapies Against Advanced Renal Cell Carcinoma. *Journal of Clinical Oncology* 2002;20(1):289-96.
7. Motzer RJ, Hutson TE, Tomczak P, et al. Sunitinib versus interferon alfa in metastatic renal-cell carcinoma. *N Engl J Med* 2007;356(2):115-24.
8. Escudier B, Eisen T, Stadler WM, et al. Sorafenib in advanced clear-cell renal-cell carcinoma. *N Engl J Med* 2007;356(2):125-34.
9. Rini BI, Halabi S, Rosenberg JE, et al. Bevacizumab plus interferon alfa compared with interferon alfa monotherapy in patients with metastatic renal cell carcinoma: CALGB 90206. *J Clin Oncol* 2008;26(33):5422-8.
10. Negrier S, Jager E, Porta C, et al. Efficacy and safety of sorafenib in patients with advanced renal cell carcinoma with and without prior cytokine therapy, a subanalysis of TARGET. *Med Oncol* 2010;27(3):899-906.
11. Sternberg CN, Davis ID, Mardiak J, et al. Pazopanib in locally advanced or metastatic renal cell carcinoma: results of a randomized phase III trial. *J Clin Oncol* 2010;28(6):1061-8.
12. Hutson TE, Lesovoy V, Al-Shukri S, et al. Axitinib versus sorafenib as first-line therapy in patients with metastatic renal-cell carcinoma: a randomised open-label phase 3 trial. *Lancet Oncol* 2013;14(13):1287-94.
13. Motzer RJ, Hutson TE, Cella D, et al. Pazopanib versus sunitinib in metastatic renal-cell carcinoma. *N Engl J Med* 2013;369(8):722-31.
14. Escudier B, Szczylik C, Hutson TE, et al. Randomized phase II trial of first-line treatment with sorafenib versus interferon Alfa-2a in patients with metastatic renal cell carcinoma. *J Clin Oncol* 2009;27(8):1280-9.
15. Choueiri TK, Halabi S, Sanford BL, et al. Cabozantinib Versus Sunitinib As Initial Targeted Therapy for Patients With Metastatic Renal Cell Carcinoma of Poor or Intermediate Risk: The Alliance A031203 CABOSUN Trial. *Journal of Clinical Oncology* 2017;35(6):591-97.
16. Motzer RJ, Tannir NM, McDermott DF, et al. Nivolumab plus Ipilimumab versus Sunitinib in Advanced Renal-Cell Carcinoma. *N Engl J Med* 2018;378(14):1277-90.

17. Jonasch E, Corn P, Pagliaro LC, et al. Upfront, randomized, phase 2 trial of sorafenib versus sorafenib and low-dose interferon alfa in patients with advanced renal cell carcinoma: clinical and biomarker analysis. *Cancer* 2010;116(1):57-65.
18. Negrier S, Gravis G, Perol D, et al. Temsirolimus and bevacizumab, or sunitinib, or interferon alfa and bevacizumab for patients with advanced renal cell carcinoma (TORAVA): a randomised phase 2 trial. *Lancet Oncol* 2011;12(7):673-80.
19. Procopio G, Verzoni E, Bracarda S, et al. Sorafenib with interleukin-2 vs sorafenib alone in metastatic renal cell carcinoma: the ROSORC trial. *Br J Cancer* 2011;104(8):1256-61.
20. Ravaud A, Barrios CH, Alekseev B, et al. RECORD-2: phase II randomized study of everolimus and bevacizumab versus interferon alpha-2a and bevacizumab as first-line therapy in patients with metastatic renal cell carcinoma. *Ann Oncol* 2015;26(7):1378-84.
21. Caldwell DM, Ades AE, Higgins JP. Simultaneous comparison of multiple treatments: combining direct and indirect evidence. *BMJ* 2005;331(7521):897-900.
22. Lu G, Ades AE. Combination of direct and indirect evidence in mixed treatment comparisons. *Stat Med* 2004;23(20):3105-24.
23. Liberati A, Altman DG, Tetzlaff J, et al. The PRISMA statement for reporting systematic reviews and meta-analyses of studies that evaluate health care interventions: explanation and elaboration. *Annals of internal medicine* 2009;151(4):W65-94
24. Higgins JPT, Altman DG, Gotzsche PC, et al. The Cochrane Collaboration's tool for assessing risk of bias in randomised trials. *BMJ* 2011;343.
25. Tierney JF, Stewart LA, Ghersi D, et al. Practical methods for incorporating summary time-to-event data into meta-analysis. *Trials* 2007;8:16.
26. Dias S, Welton NJ, Sutton AJ, et al. A Generalised Linear Modelling Framework for Pairwise and Network Meta-Analysis of Randomised Controlled Trials. *Medical Decision Making* 2014.
27. Spiegelhalter DJ, Best NG, Carlin BP, et al. Bayesian measures of model complexity and fit. *Journal of The Royal Statistical Society Series B-statistical Methodology* 2002;64(4):583-639.
28. Gelman A, Rubin DB. Markov chain Monte Carlo methods in biostatistics. *Stat Methods Med Res* 1996;5(4):339-55.
29. Powles T, Albiges L, Staehler M, et al. Updated European Association of Urology Guidelines Recommendations for the Treatment of First-line Metastatic Clear Cell Renal Cancer. *Eur Urol* 2017;73(3):311-15.
30. Dias S, Welton NJ, Sutton AJ, et al. Evidence synthesis for decision making 4: inconsistency in networks of evidence based on randomized controlled trials. *Med Decis Making* 2013;33(5):641-56.
31. Chaimani A, Higgins JP, Mavridis D, et al. Graphical tools for network meta-analysis in STATA. *PLoS One* 2013;8(10):e76654.
32. Salanti G, Ades AE, Ioannidis JP. Graphical methods and numerical summaries for presenting results from multiple-treatment meta-analysis: an overview and tutorial. *J Clin Epidemiol* 2011;64(2):163-71.

- 1  
2  
3  
4 33. Escudier B, Bellmunt J, Negrier S, et al. Phase III trial of bevacizumab plus interferon alfa-2a  
5 in patients with metastatic renal cell carcinoma (AVOREN): final analysis of overall survival. *J*  
6 *Clin Oncol* 2010;28(13):2144-50.
- 7  
8 34. Rini BI, Halabi S, Rosenberg JE, et al. Phase III trial of bevacizumab plus interferon alfa  
9 versus interferon alfa monotherapy in patients with metastatic renal cell carcinoma: final results  
10 of CALGB 90206. *J Clin Oncol* 2010;28(13):2137-43.
- 11  
12 35. Motzer RJ, Hutson TE, Tomczak P, et al. Overall survival and updated results for sunitinib  
13 compared with interferon alfa in patients with metastatic renal cell carcinoma. *J Clin Oncol*  
14 2009;27(22):3584-90.
- 15  
16 36. Motzer RJ, Nosov D, Eisen T, et al. Tivozanib versus sorafenib as initial targeted therapy for  
17 patients with metastatic renal cell carcinoma: results from a phase III trial. *J Clin Oncol*  
18 2013;31(30):3791-9.
- 19  
20 37. Rini BI, Bellmunt J, Clancy J, et al. Randomized phase III trial of temsirolimus and  
21 bevacizumab versus interferon alfa and bevacizumab in metastatic renal cell carcinoma:  
22 INTORACT trial. *J Clin Oncol* 2014;32(8):752-9.
- 23  
24 38. Motzer RJ, Hutson TE, McCann L, et al. Overall survival in renal-cell carcinoma with  
25 pazopanib versus sunitinib. *N Engl J Med* 2014;370(18):1769-70.
- 26  
27 39. Rini BI, Plimack ER, Stus V, et al. Pembrolizumab plus Axitinib versus Sunitinib for  
28 Advanced Renal-Cell Carcinoma. *N Engl J Med* 2019;380(12):1116-27.
- 29  
30 40. Motzer RJ, Penkov K, Haanen J, et al. Avelumab plus Axitinib versus Sunitinib for Advanced  
31 Renal-Cell Carcinoma. *N Engl J Med* 2019;380(12):1103-15.
- 32  
33 41. Procopio G, Verzoni E, Bracarda S, et al. Overall survival for sorafenib plus interleukin-2  
34 compared with sorafenib alone in metastatic renal cell carcinoma (mRCC): final results of the  
35 ROSORC trial. *Ann Oncol* 2013;24(12):2967-71.
- 36  
37 42. Motzer RJ, Barrios CH, Kim TM, et al. Phase II randomized trial comparing sequential  
38 first-line everolimus and second-line sunitinib versus first-line sunitinib and second-line  
39 everolimus in patients with metastatic renal cell carcinoma. *J Clin Oncol* 2014;32(25):2765-72.
- 40  
41 43. Patard JJ, Rioux-Leclercq N, Fergelot P. Understanding the importance of smart drugs in renal  
42 cell carcinoma. *Eur Urol* 2006;49(4):633-43.
- 43  
44 44. Costa LJ, Drabkin HA. Renal cell carcinoma: new developments in molecular biology and  
45 potential for targeted therapies. *Oncologist* 2007;12(12):1404-15.
- 46  
47 45. Mendel DB, Laird AD, Xin X, et al. In vivo antitumor activity of SU11248, a novel tyrosine  
48 kinase inhibitor targeting vascular endothelial growth factor and platelet-derived growth factor  
49 receptors: determination of a pharmacokinetic/pharmacodynamic relationship. *Clin Cancer Res*  
50 2003;9(1):327-37.
- 51  
52 46. Benjamin LE, Hemo I, Keshet E. A plasticity window for blood vessel remodelling is defined  
53 by pericyte coverage of the preformed endothelial network and is regulated by PDGF-B and  
54 VEGF. *Development* 1998;125(9):1591-8.
- 55  
56 47. Gee MS, Procopio WN, Makonnen S, et al. Tumor vessel development and maturation impose



- limits on the effectiveness of anti-vascular therapy. *Am J Pathol* 2003;162(1):183-93.
48. Creighton CJ, Morgan M, Gunaratne PH, et al. Comprehensive molecular characterization of clear cell renal cell carcinoma. *Nature* 2013;499(7456):43-49.
49. Loewith R, Jacinto E, Wullschlegel S, et al. Two TOR complexes, only one of which is rapamycin sensitive, have distinct roles in cell growth control. *Mol Cell* 2002;10(3):457-68.
50. Inoki K, Guan KL. Complexity of the TOR signaling network. *Trends Cell Biol* 2006;16(4):206-12.
51. Ribas A. Tumor immunotherapy directed at PD-1. *N Engl J Med* 2012;366(26):2517-9.
52. Hammers HJ, Plimack ER, Infante JR, et al. Safety and Efficacy of Nivolumab in Combination With Ipilimumab in Metastatic Renal Cell Carcinoma: The CheckMate 016 Study. *J Clin Oncol* 2017;35(34):3851-58.
53. Antonia SJ, Lopez-Martin JA, Bendell J, et al. Nivolumab alone and nivolumab plus ipilimumab in recurrent small-cell lung cancer (CheckMate 032): a multicentre, open-label, phase 1/2 trial. *Lancet Oncol* 2016;17(7):883-95.
54. McDermott DF, Lee J-L, Szczylik C, et al. Pembrolizumab monotherapy as first-line therapy in advanced clear cell renal cell carcinoma (accRCC): Results from cohort A of KEYNOTE-427. *Journal of Clinical Oncology* 2018;36(15\_suppl):4500-00.
55. Atkins MB, Plimack ER, Puzanov I, et al. Axitinib in combination with pembrolizumab in patients with advanced renal cell cancer: a non-randomised, open-label, dose-finding, and dose-expansion phase 1b trial. *Lancet Oncol* 2018;19(3):405-15.
56. Shrimali RK, Yu Z, Theoret MR, et al. Antiangiogenic agents can increase lymphocyte infiltration into tumor and enhance the effectiveness of adoptive immunotherapy of cancer. *Cancer Res* 2010;70(15):6171-80.
57. Huang Y, Yuan J, Righi E, et al. Vascular normalizing doses of antiangiogenic treatment reprogram the immunosuppressive tumor microenvironment and enhance immunotherapy. *Proceedings of the National Academy of Sciences of the United States of America* 2012;109(43):17561-6.
58. Yasuda S, Sho M, Yamato I, et al. Simultaneous blockade of programmed death 1 and vascular endothelial growth factor receptor 2 (VEGFR2) induces synergistic anti-tumour effect in vivo. *Clinical and experimental immunology* 2013;172(3):500-6.
59. Rini BI, Powles T, Atkins MB, et al. Atezolizumab plus bevacizumab versus sunitinib in patients with previously untreated metastatic renal cell carcinoma (IMmotion151): a multicentre, open-label, phase 3, randomised controlled trial. *Lancet* 2019;393(10189):2404-15.
60. Wallis CJD, Klaassen Z, Bhindi B, et al. First-line Systemic Therapy for Metastatic Renal Cell Carcinoma: A Systematic Review and Network Meta-analysis. *Eur Urol* 2018;74(3):309-21.
61. Wang J, Li X, Wu X, et al. Role of immune checkpoint inhibitor-based therapies for metastatic renal cell carcinoma in the first-line setting: A Bayesian network analysis. *EBioMedicine* 2019;47:78-88.
62. Hahn AW, Klaassen Z, Agarwal N, et al. First-line Treatment of Metastatic Renal Cell

1  
2  
3 Carcinoma: A Systematic Review and Network Meta-analysis. European urology oncology  
4 2019;2(6):708-15.  
5

6 63. Karner C, Kew K, Wakefield V, et al. Targeted therapies for previously treated advanced or  
7 metastatic renal cell carcinoma: systematic review and network meta-analysis. BMJ Open  
8 2019;9(3):e024691.  
9  
10  
11  
12  
13  
14  
15  
16  
17  
18  
19  
20  
21  
22  
23  
24  
25  
26  
27  
28  
29  
30  
31  
32  
33  
34  
35  
36  
37  
38  
39  
40  
41  
42  
43  
44  
45  
46  
47  
48  
49  
50  
51  
52  
53  
54  
55  
56  
57  
58  
59  
60

For peer review only

Table: Studies included in the multiple-treatments meta-analysis

| Study                             | Number of patients             | Age (years) median(range) | Sex (% male) | MSKCC (%) |              |      | Median PFS in months (95% CI) | Hazard ratio (95% CI)  |
|-----------------------------------|--------------------------------|---------------------------|--------------|-----------|--------------|------|-------------------------------|------------------------|
|                                   |                                |                           |              | Favorable | Intermediate | Poor |                               |                        |
| <b>Motzer 2014 (RECORD-3)</b>     |                                |                           |              |           |              |      |                               |                        |
| Eregorlimus                       | 238                            | 62 (20-89)                | 69.7         | 29        | 56           | 15   | 7.9                           | 1.4 (1.2-1.8)          |
| Sunitinib                         | 238                            | 62 (29-84)                | 73.9         | 30        | 56           | 14   | 10.7                          | 1 (Ref)                |
| <b>Motzer 2014 (COMPARZ)</b>      |                                |                           |              |           |              |      |                               |                        |
| Pazopanib                         | 557                            | 61 (18-88)                | 71           | 27        | 58           | 12   | 8.4 (8.3-10.9)                | 1.05 ( 0.90-1.22)      |
| Sunitinib                         | 553                            | 62 (23-86)                | 75           | 27        | 59           | 9    | 9.5 (8.3-11.1)                | 1 (Ref)                |
| <b>Rini 2014 (INTORACT)</b>       |                                |                           |              |           |              |      |                               |                        |
| Temsirolimus plus bevacizumab     | 400                            | 59 (22-87)                | 72           | 28        | 65           | 8    | 9.1 (8.1-10.2)                | 1.1 (0.9-1.3)          |
| Bevacizumab plus IFN- $\alpha$    | 391                            | 58 (23-81)                | 69           | 27        | 65           | 8    | 9.3 (9.0-11.2)                | 1 (Ref)                |
| <b>Pirotto 2013 (ROSORC)</b>      |                                |                           |              |           |              |      |                               |                        |
| Sorafenib plus interleukin-2      | 66                             | 64 (57-69) *              | 79           | 55        | 41           | 5    | NA                            | NA                     |
| Sorafenib                         | 62                             | 62 (52-69) *              | 69           | 55        | 39           | 6    | NA                            | NA                     |
| <b>Hasson 2013</b>                |                                |                           |              |           |              |      |                               |                        |
| Axitinib                          | 192                            | 58 (23-83)                | 70           | 49        | 44           | 4    | 10.1 (7.2-12.1)]              | 0.77 ( 0.56-1.05)      |
| Sorafenib                         | 96                             | 58 (20-77)                | 77           | 55        | 42           | 2    | 6.5 (4.7-8.3)                 | 1 (Ref)                |
| <b>Motzer 2013</b>                |                                |                           |              |           |              |      |                               |                        |
| Tivozanib                         | 260;<br>treatment-naive 181    | 59 (23-83)                | 71           | 27        | 67           | 7    | 12.7 (9.1-15.0)               | 0.756<br>(0.580-0.985) |
| Sorafenib                         | 257;<br>treatment naive 181    | 59 (23-85)                | 74           | 34        | 62           | 4    | 9.1 (7.3-10.8)                | 1 (Ref)                |
| <b>Sternberg 2010 (VEG105192)</b> |                                |                           |              |           |              |      |                               |                        |
| Pazopanib                         | 290;<br>treatment naive 155    | 59 (28-82)                | 68           | 36        | 56           | 4    | 11.1                          | 0.40 (0.27-0.60)       |
| Placebo                           | n = 145;<br>treatment naive 78 | 62 (25-81)                | 74           | 40        | 51           | 6    | 2.8                           | 1 (Ref)                |
| <b>Motzer 2009</b>                |                                |                           |              |           |              |      |                               |                        |
| Sunitinib                         | 375                            | 62 (27-87)                | 71           | 38        | 56           | 6    | 11 (11-13)                    | 0.539<br>(0.451-0.643) |
| IFN- $\alpha$                     | 375                            | 59 (34-85)                | 72           | 34        | 59           | 7    | 5 (4-6)                       | 1 (Ref)                |
| <b>Ngrier 2010 (TARGET)</b>       |                                |                           |              |           |              |      |                               |                        |
| Sorafenib                         | 451;<br>treatment-naive 77     | 60                        | 63.6         | 53.2      | 46.8         | 0    | 5.8                           | 0.48 (0.32-0.73)       |
| Placebo                           | 452;<br>treatment-naive 84     | 60.5                      | 69           | 45.2      | 54.8         | 0    | 2.8                           | 1 (Ref)                |
| <b>Rini 2010 (CALGB 90206)</b>    |                                |                           |              |           |              |      |                               |                        |
| Bevacizumab plus IFN- $\alpha$    | 369                            | 61 (56-70)                | 73           | 26        | 64           | 10   | 8.5 (7.5-9.7)                 | 0.71 ( 0.61-0.83)      |
| IFN- $\alpha$                     | 363                            | 62 (55-70)                | 66           | 26        | 64           | 10   | 5.2 (3.1-5.6)                 | 1 (Ref)                |
| <b>Escudier 2010 (AVOREN)</b>     |                                |                           |              |           |              |      |                               |                        |
| Bevacizumab plus IFN- $\alpha$    | 327                            | 61 (30-82)                | 68           | 27        | 56           | 9    | 10.2                          | 0.61 (0.51-0.73)       |
| IFN- $\alpha$                     | 322                            | 60 (18-81)                | 73           | 29        | 56           | 8    | 5.4                           | 1 (Ref)                |

Continued

|    |                                        |     |            |      |                   |                   |                   |                   |                              |
|----|----------------------------------------|-----|------------|------|-------------------|-------------------|-------------------|-------------------|------------------------------|
| 1  |                                        |     |            |      |                   |                   |                   |                   |                              |
| 2  |                                        |     |            |      |                   |                   |                   |                   |                              |
| 3  | <b>Motzer 2018 (CheckMate 214)</b>     |     |            |      |                   |                   |                   |                   |                              |
| 4  | Nivolumab plus Ipilimumab              | 550 | 62 (26-85) | 75   | 23                | 61                | 17                | 11.6 (8.7–15.5)   | 0.82(0.64-1.05) <sup>†</sup> |
| 5  | Sunitinib                              | 546 | 62 (21-85) | 72   | 23                | 61                | 16                | 8.4 (7.0–10.8)    | 1 (Ref)                      |
| 6  |                                        |     |            |      |                   |                   |                   |                   |                              |
| 7  | <b>Choueiri 2017</b>                   |     |            |      |                   |                   |                   |                   |                              |
| 8  | Cabozantinib                           | 79  | 63 (40-82) | 83.5 | 0                 | 81.0 <sup>§</sup> | 19.0 <sup>§</sup> | 8.2 ( 6.2 to 8.8) | 0.66 (0.46-0.95)             |
| 9  | Sunitinib                              | 78  | 64(31-87)  | 73.1 | 0                 | 80.8 <sup>§</sup> | 19.2 <sup>§</sup> | 5.6 (3.4 to 8.1)  | 1 (Ref)                      |
| 10 |                                        |     |            |      |                   |                   |                   |                   |                              |
| 11 | <b>Motzer 2019 (JAVELIN Renal 101)</b> |     |            |      |                   |                   |                   |                   |                              |
| 12 | Avelumab plus Axitinib                 | 442 | 62 (29-83) | 71.5 | 21.7              | 64.0              | 11.5              | 13.8 (11.1-NE)    | 0.69 (0.56-0.84)             |
| 13 | Sunitinib                              | 444 | 61 (27-88) | 77.5 | 22.5              | 66.0              | 10.1              | 8.4 (6.9-11.1)    | 1 (Ref)                      |
| 14 |                                        |     |            |      |                   |                   |                   |                   |                              |
| 15 | <b>Rizvi 2019 (KEYNOTE-426)</b>        |     |            |      |                   |                   |                   |                   |                              |
| 16 | Pembrolizumab and Axitinib             | 432 | 62 (30-89) | 71.3 | 31.9 <sup>§</sup> | 55.1 <sup>§</sup> | 13 <sup>§</sup>   | 15.1 (12.6-17.7)  | 0.69 (0.57-0.84)             |
| 17 | Sunitinib                              | 429 | 61 (26-90) | 74.6 | 30.5 <sup>§</sup> | 57.3 <sup>§</sup> | 12.1 <sup>§</sup> | 11.1 (8.7-12.5)   | 1 (Ref)                      |

19 IFN- $\alpha$  = interferon- $\alpha$ ; MSKCC = Memorial Sloan Kettering Cancer Center; PFS = progression-free survival; CI = confidence interval; AE = adverse event;  
 20 NA = not available; Ref = reference group (hence hazard ratio set to 1);

21 \* Interquartile range; <sup>†</sup> mean; <sup>‡</sup> 99.1% CI; <sup>§</sup> IMDC risk group, International Metastatic Renal Cell Carcinoma Database Consortium

24  
25  
26  
27  
28  
29  
30  
31 **Legends for Figures**

32  
33  
34 **Fig. 1 - Literature search and selection**

35  
36  
37  
38 **Fig. 2 - Analysis of progression-free survival for patients with favorable-risk disease.**

39 (A) network diagram: the size of every treatment node corresponds to the number of randomly  
 40 assigned patients. The width of the lines is proportional to the number of trials. (B) forest plot,  
 41 with sunitinib as the comparator; (C) Ranking of treatments. Rankograms were drawn according  
 42 to distribution of the ranking probabilities. Ranking indicates the probability to be the best  
 43 treatment, the second best, the third best, and so on in terms of PFS, among the 13 treatments. HR  
 44 = hazard ratio. CI = confidence interval. Numbers in parentheses indicate 95% credible intervals.  
 45 SUN = sunitinib. PLA = placebo. IFN = interferon- $\alpha$ . SOR = sorafenib. PAZ = pazopanib. AXI =  
 46 axitinib. EVE = everolimus. TIV = tivozanib. BEV\_IFN = bevacizumab plus interferon- $\alpha$ .  
 47 TEM\_BEV = temsirolimus plus bevacizumab. NIV\_IPI = nivolumab plus ipilimumab.  
 48 PEM\_AXI= pembrolizumab plus axitinib. AVE\_AXI= avelumab plus axitinib.  
 49  
50  
51  
52  
53  
54  
55  
56  
57  
58  
59  
60

**Fig. 3 - Analysis of progression-free survival for patients with intermediate-risk disease.** (A) network diagram. (B) forest plot, with sunitinib as the comparator; (C) Ranking of treatments. HR = hazard ratio. CI = confidence interval. Numbers in parentheses indicate 95% credible intervals. SUN = sunitinib. PLA = placebo. IFN = interferon- $\alpha$ . SOR = sorafenib. PAZ = pazopanib. AXI = axitinib. EVE = everolimus. TIV = tivozanib. CAB = cabozantinib. BEV\_IFN = bevacizumab plus interferon- $\alpha$ . TEM\_BEV = temsirolimus plus bevacizumab. NIV\_IPI = nivolumab plus ipilimumab. PEM\_AXI= pembrolizumab plus axitinib. AVE\_AXI= avelumab plus axitinib.

**Fig. 4 - Analysis of progression-free survival for patients with poor-risk disease.** (A) network diagram. (B) forest plot, with sunitinib as the comparator; (C) Ranking of treatments. HR = hazard ratio. CI = confidence interval. Numbers in parentheses indicate 95% credible intervals. SUN = sunitinib. IFN = interferon- $\alpha$ . EVE = everolimus. CAB = cabozantinib. BEV\_IFN = bevacizumab plus interferon- $\alpha$ . TEM\_BEV = temsirolimus plus bevacizumab. NIV\_IPI = nivolumab plus ipilimumab. PEM\_AXI= pembrolizumab plus axitinib. AVE\_AXI= avelumab plus axitinib.

**Fig.5- Analysis of overall survival for patients with favorable- risk (A), intermediate- risk (B), and poor-risk (C).** HR = hazard ratio. CI = confidence interval. Numbers in parentheses indicate 95% credible intervals. SUN = sunitinib. PAZ = pazopanib. NIV\_IPI = nivolumab plus ipilimumab. PEM\_AXI= pembrolizumab plus axitinib.

**Fig. 6 - Pooled odds ratios for high-grade adverse events.**

The column treatment is compared with the row treatment. Odds ratios lower than 1 favor the column-defining treatment. Numbers in parentheses indicate 95% credible intervals. SUN = sunitinib. PLA = placebo. SOR = sorafenib. PAZ = pazopanib. TIV = tivozanib. CAB = cabozantinib. SOR\_IL-2= sorafenib plus interleukin-2. NIV\_IPI

1  
2  
3  
4 = nivolumab plus ipilimumab. PEM\_AXI= pembrolizumab plus axitinib. AVE\_AXI=  
5 avelumab plus axitinib. Stepwise comparison of treatments did not find significant  
6 differences in rates of high-grade adverse events.  
7  
8  
9

10  
11 **Fig. 7 - Funnel plot of randomized controlled trials included in the meta-analysis**  
12 **for hazard ratios of progression-free survival**

13  
14 SUN = sunitinib. PLA = placebo. IFN = interferon- $\alpha$ . SOR = sorafenib. PAZ =  
15 pazopanib. AXI = axitinib. EVE = everolimus. TIV = tivozanib. BEV\_IFN =  
16 bevacizumab plus interferon- $\alpha$ . TEM\_BEV = temsirolimus plus bevacizumab.  
17 NIV\_IPI = nivolumab plus ipilimumab. PEM\_AXI= pembrolizumab plus axitinib.  
18 AVE\_AXI= avelumab plus axitinib.  
19  
20  
21  
22  
23  
24  
25  
26  
27  
28  
29  
30  
31  
32  
33  
34  
35  
36  
37  
38  
39  
40  
41  
42  
43  
44  
45  
46  
47  
48  
49  
50  
51  
52  
53  
54  
55  
56  
57  
58  
59  
60

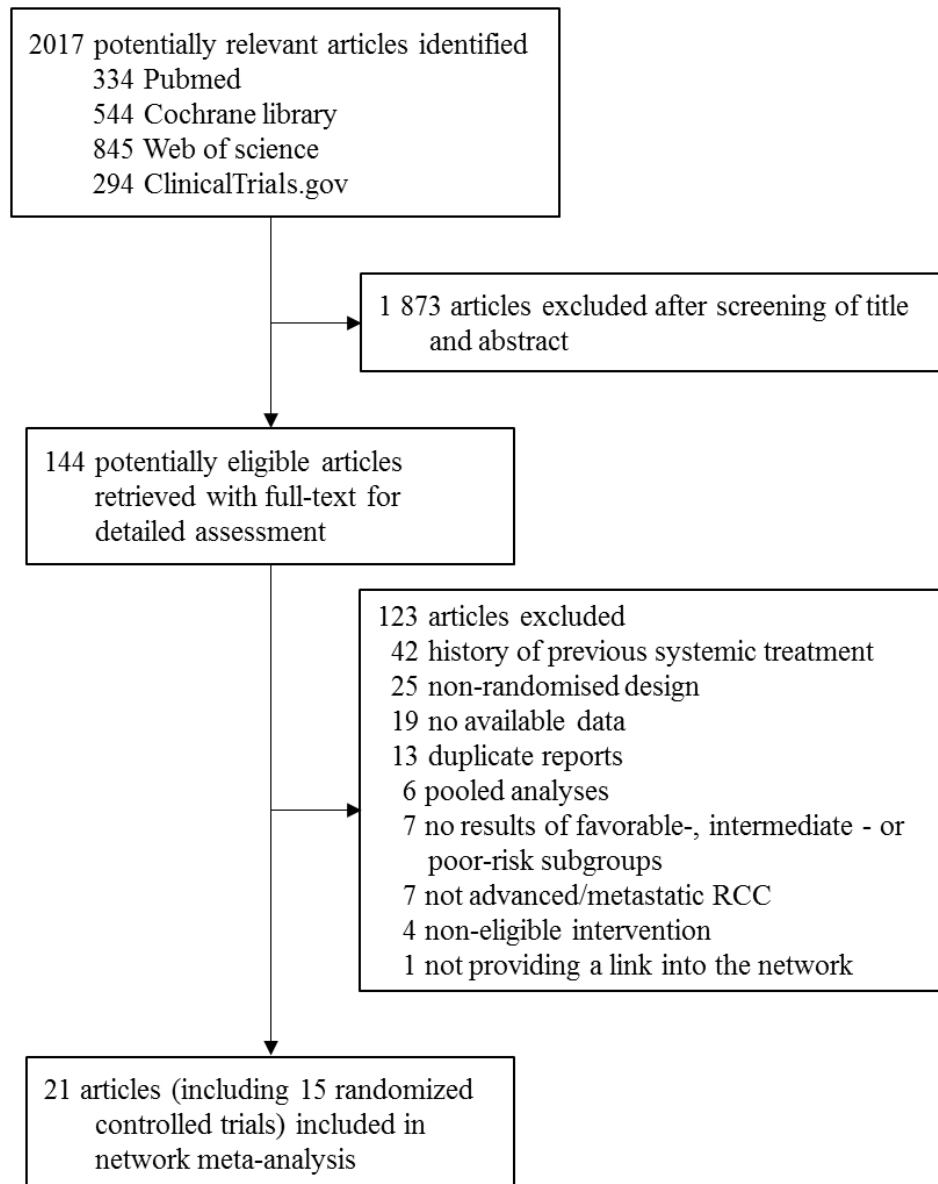

Fig. 1 - Literature search and selection

140x174mm (150 x 150 DPI)

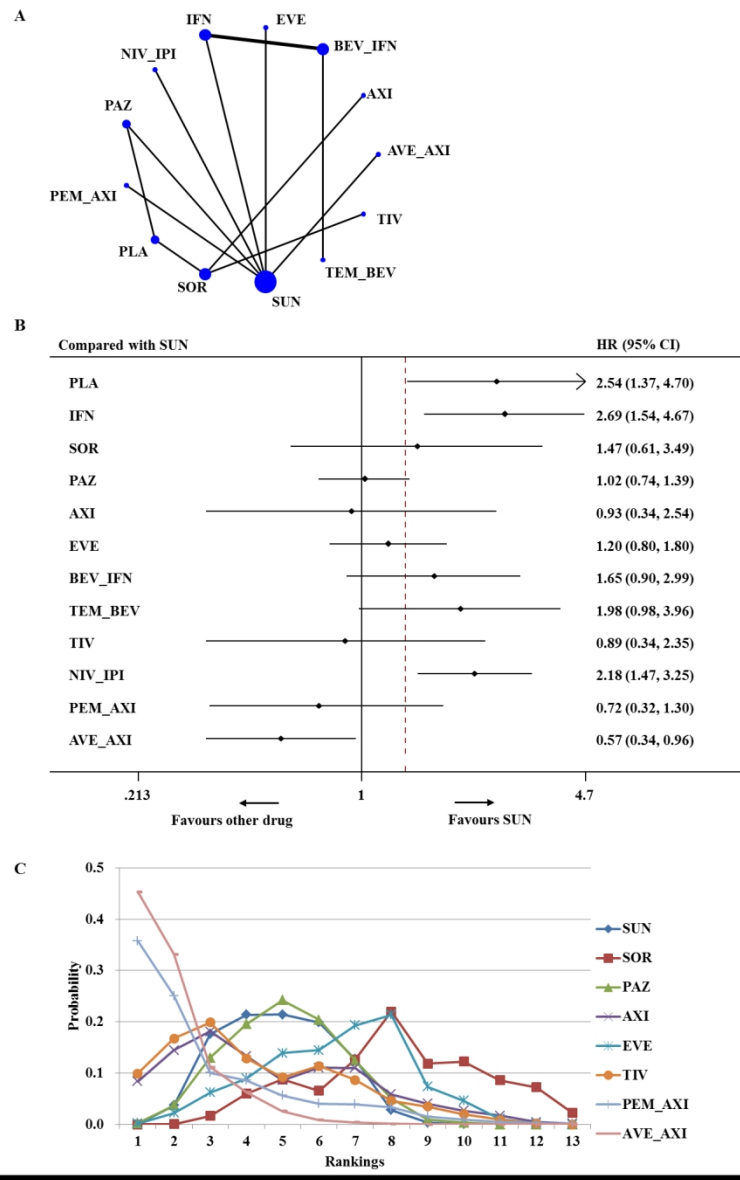

Fig. 2 - Analysis of progression-free survival for patients with favorable-risk disease. (A) network diagram: the size of every treatment node corresponds to the number of randomly assigned patients. The width of the lines is proportional to the number of trials. (B) forest plot, with sunitinib as the comparator; (C) Ranking of treatments. Rankograms were drawn according to distribution of the ranking probabilities. Ranking indicates the probability to be the best treatment, the second best, the third best, and so on in terms of PFS, among the 13 treatments. HR = hazard ratio. CI = confidence interval. Numbers in parentheses indicate 95% credible intervals. SUN = sunitinib. PLA = placebo. IFN = interferon- $\alpha$ . SOR = sorafenib. PAZ = pazopanib. AXI = axitinib. EVE = everolimus. TIV = tivozanib. BEV\_IFN = bevacizumab plus interferon- $\alpha$ . TEM\_BEV = temsirolimus plus bevacizumab. NIV\_IPI = nivolumab plus ipilimumab. PEM\_AXI= pembrolizumab plus axitinib. AVE\_AXI= avelumab plus axitinib.

220x347mm (150 x 150 DPI)



1  
2  
3  
4  
5  
6  
7  
8  
9  
10  
11  
12  
13  
14  
15  
16  
17  
18  
19  
20  
21  
22  
23  
24  
25  
26  
27  
28  
29  
30  
31  
32  
33  
34  
35  
36  
37  
38  
39  
40  
41  
42  
43  
44  
45  
46  
47  
48  
49  
50  
51  
52  
53  
54  
55  
56  
57  
58  
59  
60

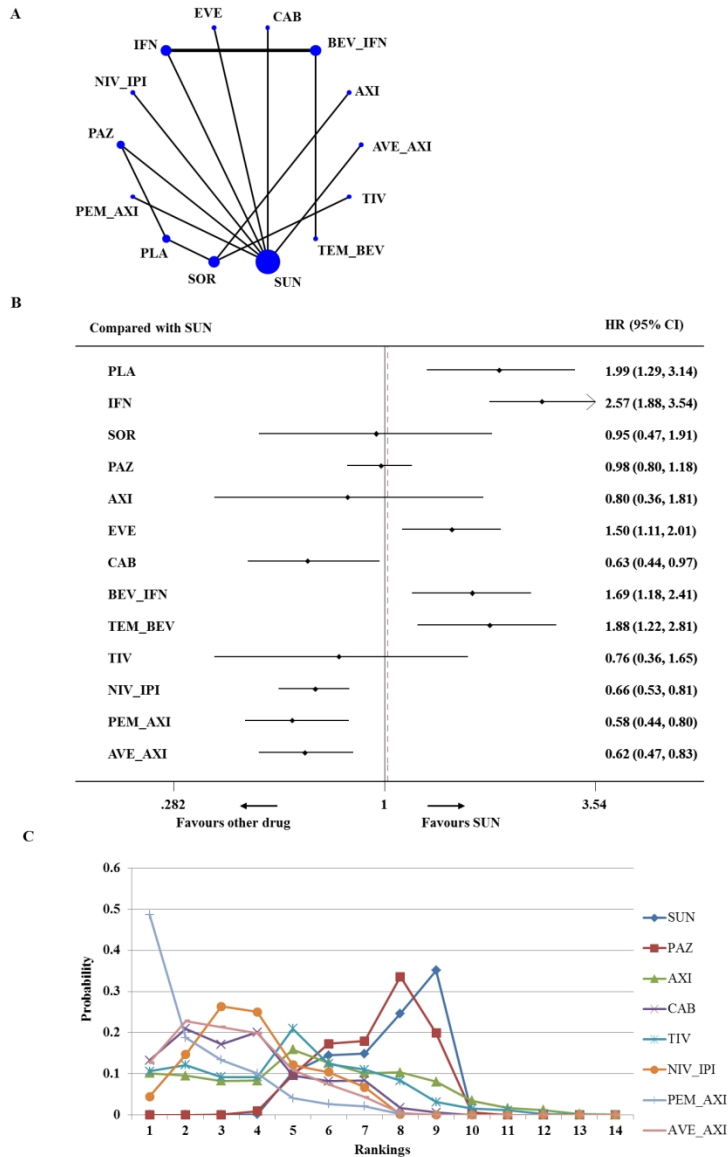

Fig. 3 - Analysis of progression-free survival for patients with intermediate-risk disease. (A) network diagram. (B) forest plot, with sunitinib as the comparator; (C) Ranking of treatments. HR = hazard ratio. CI = confidence interval. Numbers in parentheses indicate 95% credible intervals. SUN = sunitinib. PLA = placebo. IFN = interferon- $\alpha$ . SOR = sorafenib. PAZ = pazopanib. AXI = axitinib. EVE = everolimus. TIV = tivozanib. CAB = cabozantinib. BEV\_IFN = bevacizumab plus interferon- $\alpha$ . TEM\_BEV = temsirolimus plus bevacizumab. NIV\_IPI = nivolumab plus ipilimumab. PEM\_AXI= pembrolizumab plus axitinib. AVE\_AXI= avelumab plus axitinib.

235x369mm (150 x 150 DPI)

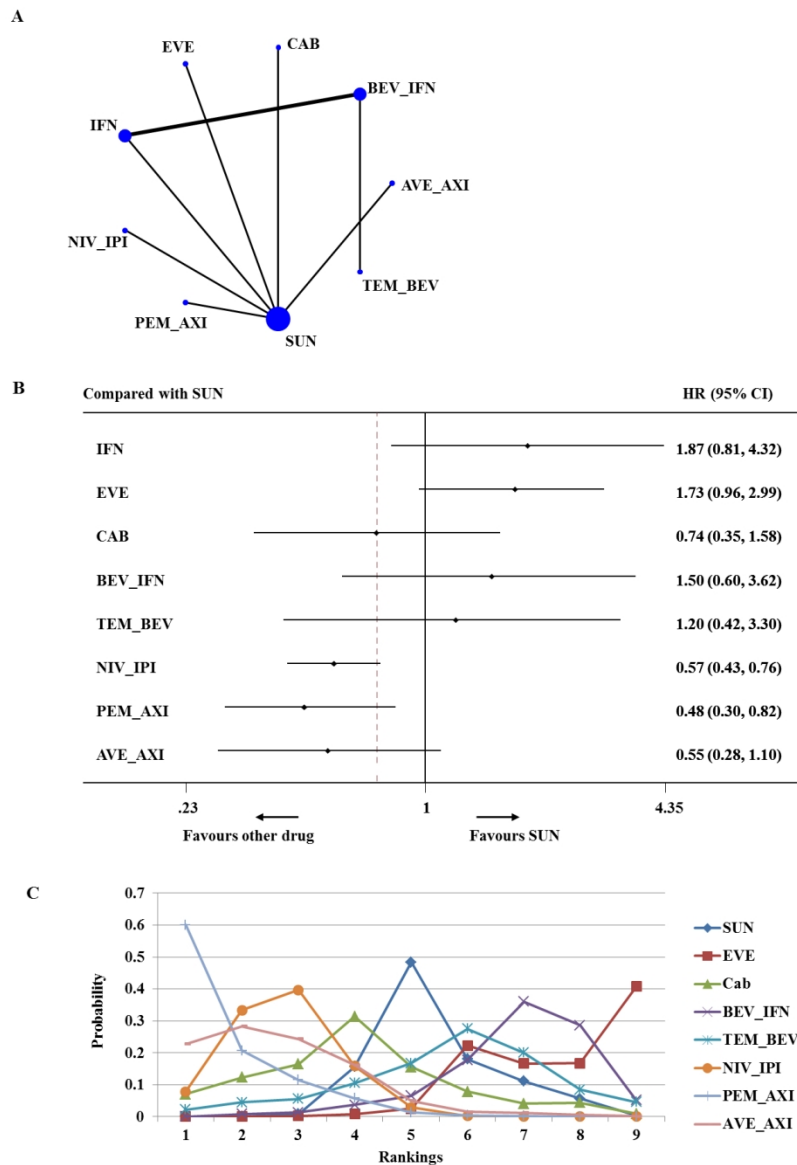

Fig. 4 - Analysis of progression-free survival for patients with poor-risk disease. (A) network diagram. (B) forest plot, with sunitinib as the comparator; (C) Ranking of treatments. HR = hazard ratio. CI = confidence interval. Numbers in parentheses indicate 95% credible intervals. SUN = sunitinib. IFN = interferon- $\alpha$ . EVE = everolimus. CAB = cabozantinib. BEV\_IFN = bevacizumab plus interferon- $\alpha$ . TEM\_BEV = temsirolimus plus bevacizumab. NIV\_IPI = nivolumab plus ipilimumab. PEM\_AXI = pembrolizumab plus axitinib. AVE\_AXI = avelumab plus axitinib.

221x322mm (150 x 150 DPI)

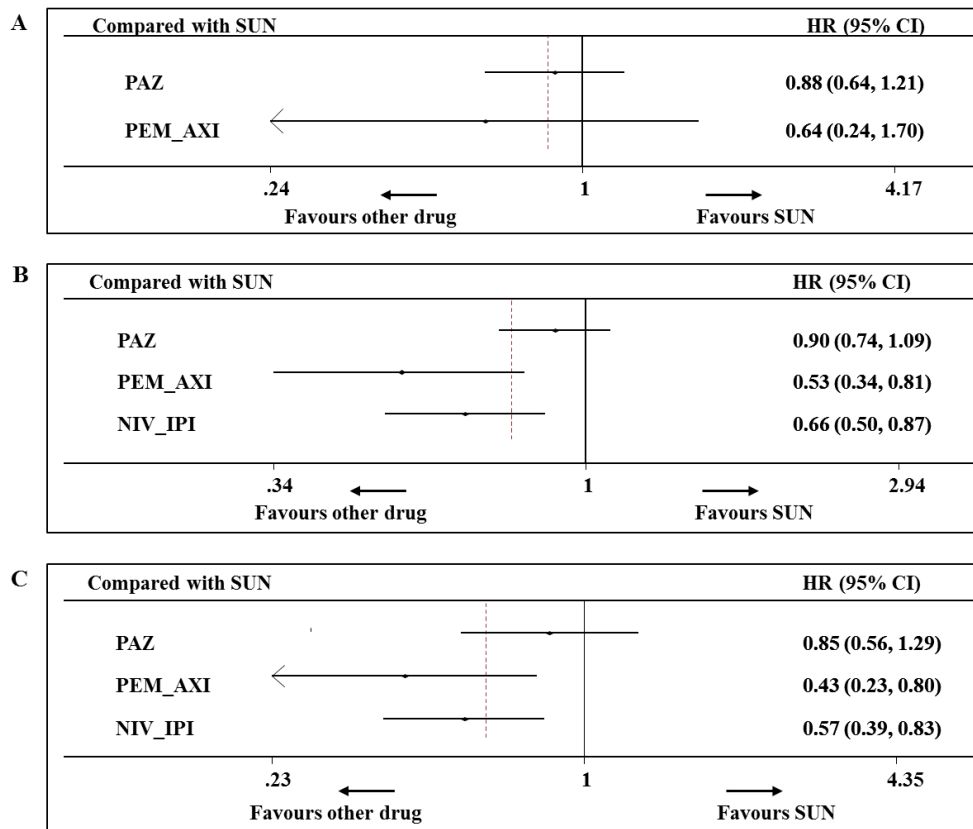

Fig.5- Analysis of overall survival for patients with favorable- risk (A), intermediate- risk (B), and poor-risk (C). HR = hazard ratio. CI = confidence interval. Numbers in parentheses indicate 95% credible intervals. SUN = sunitinib. PAZ = pazopanib. NIV\_IPI = nivolumab plus ipilimumab. PEM\_AXI= pembrolizumab plus axitinib.

205x173mm (150 x 150 DPI)

|          |                      |                        |                       |                        |                       |                         |                       |                        |                        |
|----------|----------------------|------------------------|-----------------------|------------------------|-----------------------|-------------------------|-----------------------|------------------------|------------------------|
| SUN      | 0.40<br>(0.02, 8.55) | 2.83<br>(0.06, 150.75) | 1.07<br>(0.12, 9.19)  | 1.98<br>(0.02, 201.54) | 0.92<br>(0.09, 8.13)  | 5.29<br>(0.06, 499.51)  | 0.49<br>(0.05, 4.26)  | 1.30<br>(0.15, 12.14)  | 1.00<br>(0.11, 8.77)   |
| PLA      |                      | 7.16<br>(0.63, 94.46)  | 2.67<br>(0.31, 24.54) | 4.95<br>(0.20, 156.27) | 2.30<br>(0.05, 99.17) | 12.98<br>(0.45, 392.76) | 1.24<br>(0.03, 52.88) | 3.33<br>(0.08, 135.00) | 2.48<br>(0.06, 109.18) |
| SOR      |                      |                        | 0.38<br>(0.01, 9.58)  | 0.69<br>(0.08, 6.50)   | 0.32<br>(0.00, 30.01) | 1.82<br>(0.18, 16.55)   | 0.17<br>(0.00, 13.75) | 0.46<br>(0.00, 39.97)  | 0.36<br>(0.00, 30.63)  |
| PAZ      |                      |                        |                       | 1.84<br>(0.04, 110.86) | 0.87<br>(0.03, 19.18) | 4.87<br>(0.09, 278.21)  | 0.46<br>(0.02, 10.04) | 1.22<br>(0.06, 25.58)  | 0.92<br>(0.04, 19.41)  |
| TIV      |                      |                        |                       |                        | 0.46<br>(0.00, 67.33) | 2.63<br>(0.11, 53.00)   | 0.25<br>(0.00, 33.35) | 0.66<br>(0.00, 91.27)  | 0.51<br>(0.00, 67.33)  |
| CAB      |                      |                        |                       |                        |                       | 5.80<br>(0.03, 947.65)  | 0.53<br>(0.02, 13.17) | 1.42<br>(0.06, 33.89)  | 1.08<br>(0.05, 25.63)  |
| SOR_IL-2 |                      |                        |                       |                        |                       |                         | 0.09<br>(0.00, 13.57) | 0.25<br>(0.00, 40.53)  | 0.19<br>(0.00, 28.00)  |
| NIV_IPI  |                      |                        |                       |                        |                       |                         |                       | 2.65<br>(0.13, 58.75)  | 2.04<br>(0.09, 44.95)  |
| PEM_AXI  |                      |                        |                       |                        |                       |                         |                       |                        | 0.76<br>(0.03, 16.68)  |
| AVE_AXI  |                      |                        |                       |                        |                       |                         |                       |                        |                        |

Fig. 6 - Pooled odds ratios for high-grade adverse events.

The column treatment is compared with the row treatment. Odds ratios lower than 1 favor the column-defining treatment. Numbers in parentheses indicate 95% credible intervals. SUN = sunitinib. PLA = placebo. SOR = sorafenib. PAZ = pazopanib. TIV = tivozanib. CAB = cabozantinib. SOR\_IL-2= sorafenib plus interleukin-2. NIV\_IPI = nivolumab plus ipilimumab. PEM\_AXI= pembrolizumab plus axitinib. AVE\_AXI= avelumab plus axitinib. Stepwise comparison of treatments did not find significant differences in rates of high-grade adverse events.

256x138mm (150 x 150 DPI)

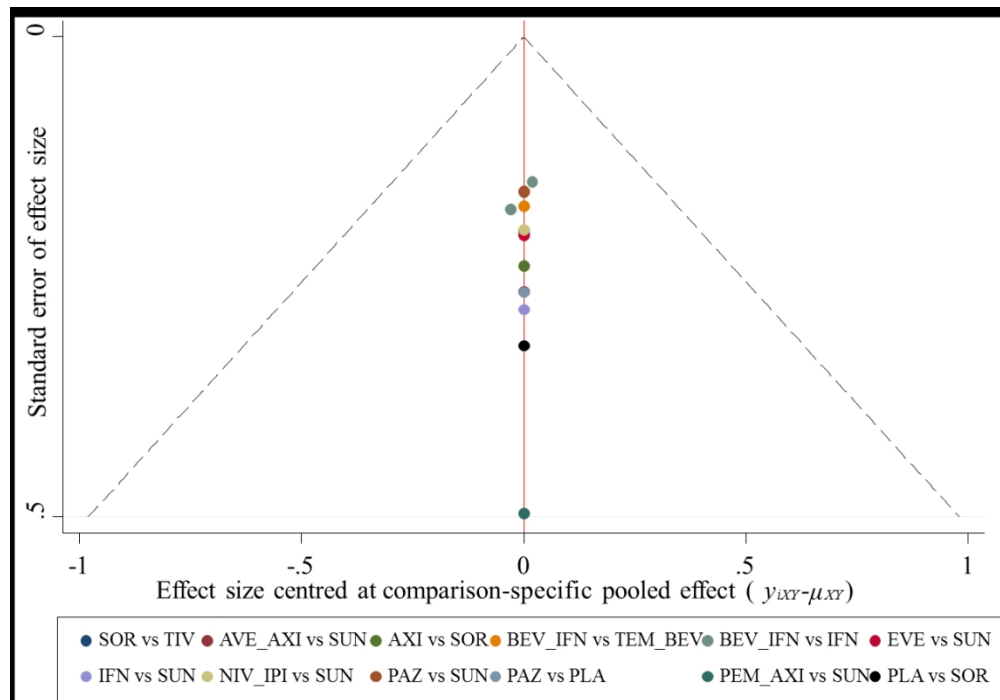

Fig. 7 - Funnel plot of randomized controlled trials included in the meta-analysis for hazard ratios of progression-free survival  
 SUN = sunitinib. PLA = placebo. IFN = interferon- $\alpha$ . SOR = sorafenib. PAZ = pazopanib. AXI = axitinib. EVE = everolimus. TIV = tivozanib. BEV\_IFN = bevacizumab plus interferon- $\alpha$ . TEM\_BEV = temsirolimus plus bevacizumab. NIV\_IPI = nivolumab plus ipilimumab. PEM\_AXI= pembrolizumab plus axitinib. AVE\_AXI= avelumab plus axitinib.

215x150mm (150 x 150 DPI)

## Appendix

### Search strategy

#### Pubmed:

((((((((((((sorafenib[Title/Abstract]) OR sunitinib[Title/Abstract]) OR bevacizumab[Title/Abstract]) OR pazopanib[Title/Abstract]) OR temsirolimus[Title/Abstract]) OR everolimus[Title/Abstract]) OR axitinib[Title/Abstract]) OR Cabozantinib[Title/Abstract]) OR IFN-alpha[Title/Abstract]) OR IL-2[Title/Abstract]) OR Nivolumab[Title/Abstract]) OR Immune checkpoint blockade[Title/Abstract])) AND (("Carcinoma, Renal Cell"[Mesh]) OR (((renal cancer[Title]) OR renal carcinoma[Title]) OR kidney cancer[Title]) OR kidney carcinoma[Title]))  
Filter: Controlled Clinical Trial

#### Cochrane Library:

#1 sorafenib:ti,ab,kw or sunitinib:ti,ab,kw or bevacizumab:ti,ab,kw or temsirolimus:ti,ab,kw or pazopanib:ti,ab,kw (Word variations have been searched)  
#2 everolimus:ti,ab,kw or afatinib:ti,ab,kw or cabozantinib:ti,ab,kw or IFN:ti,ab,kw or IL-2:ti,ab,kw (Word variations have been searched)  
#3 nivolumab:ti,ab,kw or Immune checkpoint blockade:ti,ab,kw (Word variations have been searched)  
#4 MeSH descriptor: [Carcinoma, Renal Cell] explode all trees  
#5 #1 or #2 or #3  
#6 #4 and #5, Filter: Trials

#### Web of science

# 1 (((((((((((Topic: (sorafenib) OR Topic: (sunitinib)) OR Topic: (bevacizumab)) OR Topic: (pazopanib)) OR Topic: (temsirolimus)) OR Topic: (everolimus)) OR Topic: (afatinib)) OR Topic: (cabozantinib)) OR Topic: (IFN)) OR Topic: (IL-2)) OR Topic: (nivolumab)) OR Topic: (Immune checkpoint blockade))  
# 2 Title: (renal cell carcinoma) OR Title: (renal cancer) OR Title: (renal carcinoma) OR Title: (kidney cancer) OR Title: (kidney carcinoma)  
# 3 #2 AND #1  
# 4 #2 AND #1 Document Types: CLINICAL TRIAL

**ClinicalTrials.gov:**

Category: “renal cell carcinoma OR renal cancer OR renal carcinoma OR kidney cancer OR kidney carcinoma, Studies With Results”

(<http://clinicaltrials.gov/>)

For peer review only



**Appendix figure 1 Analysis of overall survival for patients with favorable-risk disease.**

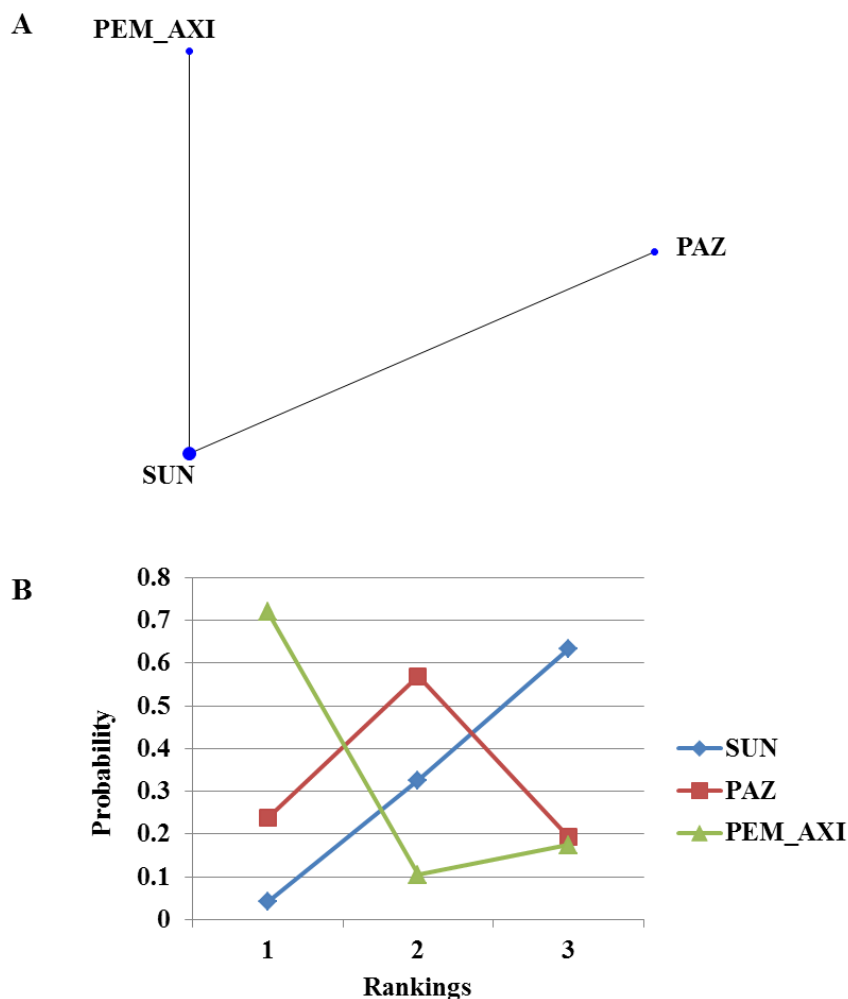

(A) network diagram: the size of every treatment node corresponds to the number of randomly assigned patients. The width of the lines is proportional to the number of trials. (B) Ranking of treatments in terms of overall survival. Rankograms were drawn according to distribution of the ranking probabilities. Ranking indicates the probability to be the best treatment, the second best, the third best, and so on in terms of overall survival, among the three treatments. SUN = sunitinib. PAZ = pazopanib. PEM\_AXI = pembrolizumab plus axitinib.

Appendix figure 2 Analysis of overall survival for patients with intermediate-risk disease.

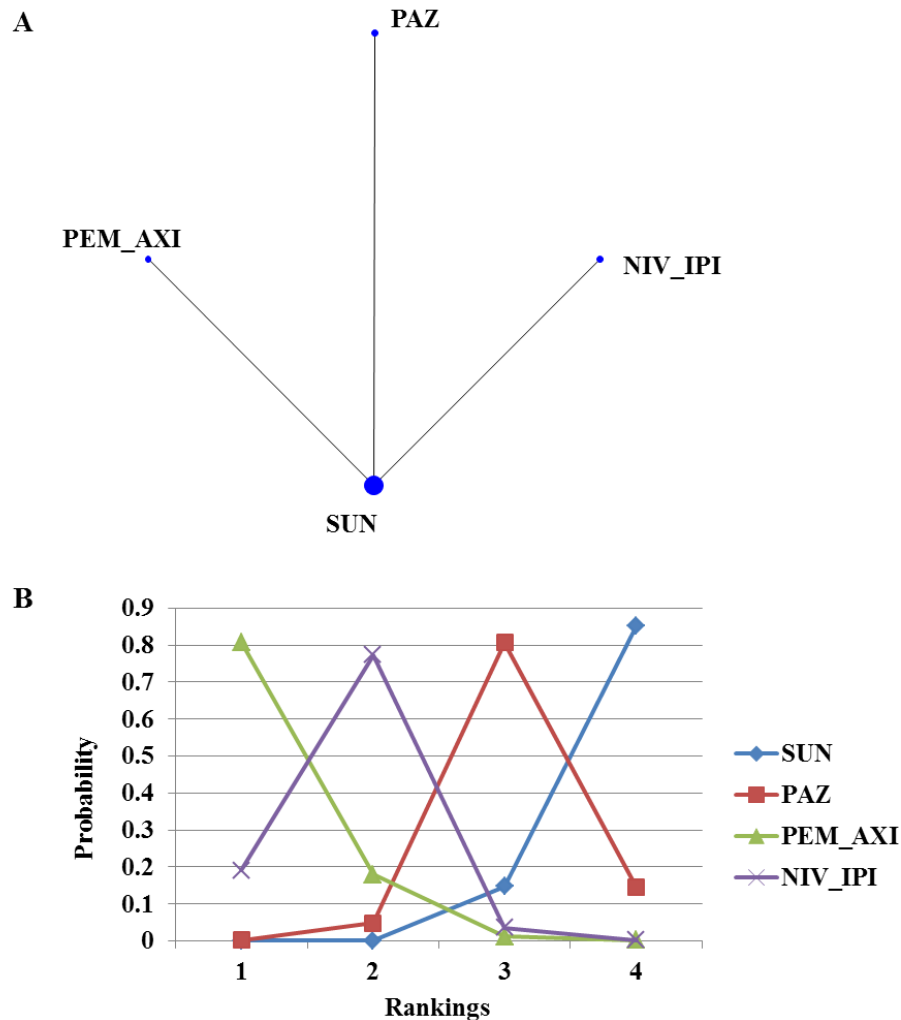

(A) network diagram: the size of every treatment node corresponds to the number of randomly assigned patients. The width of the lines is proportional to the number of trials. (B) Ranking of treatments in terms of overall survival. Rankograms were drawn according to distribution of the ranking probabilities. Ranking indicates the probability to be the best treatment, the second best, the third best, and so on in terms of overall survival, among the four treatments. SUN = sunitinib. PAZ = pazopanib. NIV\_IPI = nivolumab plus ipilimumab. PEM\_AXI = pembrolizumab plus axitinib.

### Appendix figure 3 Analysis of overall survival for patients with poor-risk disease.

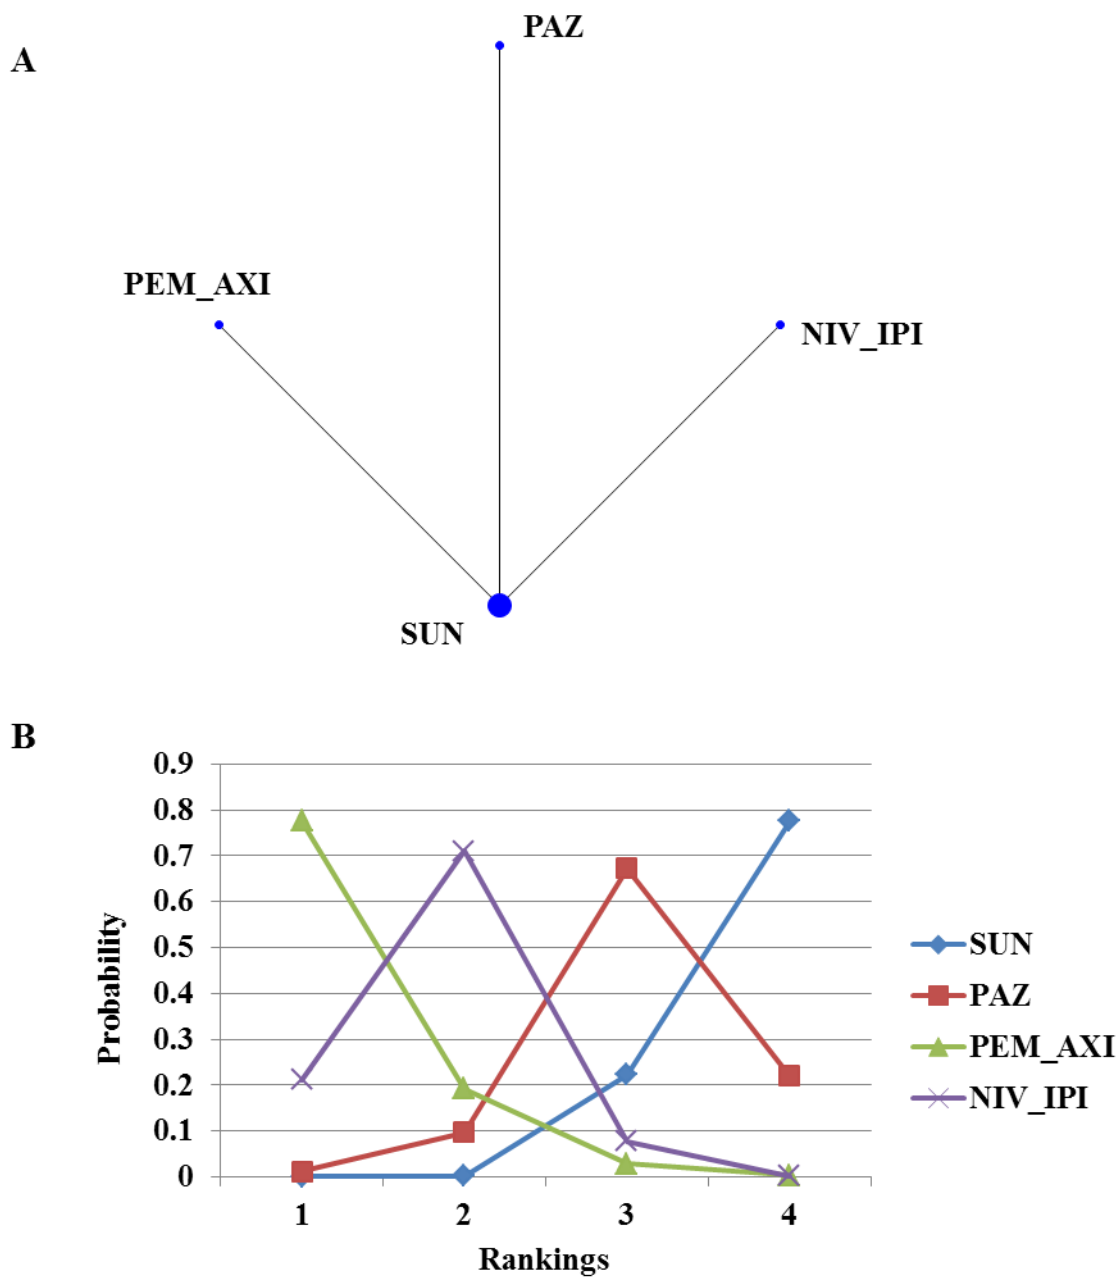

(A) network diagram: the size of every treatment node corresponds to the number of randomly assigned patients. The width of the lines is proportional to the number of trials. (B) Ranking of treatments in terms of overall survival. Rankograms were drawn according to distribution of the ranking probabilities. Ranking indicates the probability to be the best treatment, the second best, the third best, and so on in terms of overall survival, among the four treatments. SUN = sunitinib. PAZ = pazopanib. NIV\_IPI = nivolumab plus ipilimumab. PEM\_AXI = pembrolizumab plus axitinib.

**Appendix figure 4:** Pooled odds ratios for **overall adverse events** by Bayesian network meta-analysis

|     |                       |                       |                       |                       |                        |
|-----|-----------------------|-----------------------|-----------------------|-----------------------|------------------------|
| SUN | 2.28<br>(0.27, 23.95) | 1.05<br>(0.03, 45.23) | 0.34<br>(0.08, 1.40)  | 0.38<br>(0.05, 2.41)  | 1.61<br>(0.17, 19.17)  |
|     | PAZ                   | 0.46<br>(0.01, 34.72) | 0.15<br>(0.01, 1.94)  | 0.16<br>(0.01, 2.69)  | 0.68<br>(0.03, 18.38)  |
|     |                       | CAB                   | 0.33<br>(0.01, 14.72) | 0.36<br>(0.00, 18.55) | 1.57<br>(0.02, 115.31) |
|     |                       |                       | NIV_IPI               | 1.12<br>(0.10, 11.68) | 4.77<br>(0.32, 84.86)  |
|     |                       |                       |                       | PEM_AXI               | 4.31<br>(0.22, 98.04)  |
|     |                       |                       |                       |                       | AVE_AXI                |

The column treatment is compared with the row treatment. ORs lower than 1 favor the column-defining treatment. Numbers in parentheses indicate 95% credible intervals. Stepwise comparison of treatments did not find significant differences in rates of overall adverse events. SUN = sunitinib. PAZ = pazopanib. CAB = cabozantinib. NIV\_IPI = nivolumab plus ipilimumab, PEM\_AXI = pembrolizumab and axitinib, AVE\_AXI= avelumab plus axitinib.

**Appendix figure 5** Pooled hazard ratios for progression-free survival by Bayesian network-analysis and traditional meta-analysis

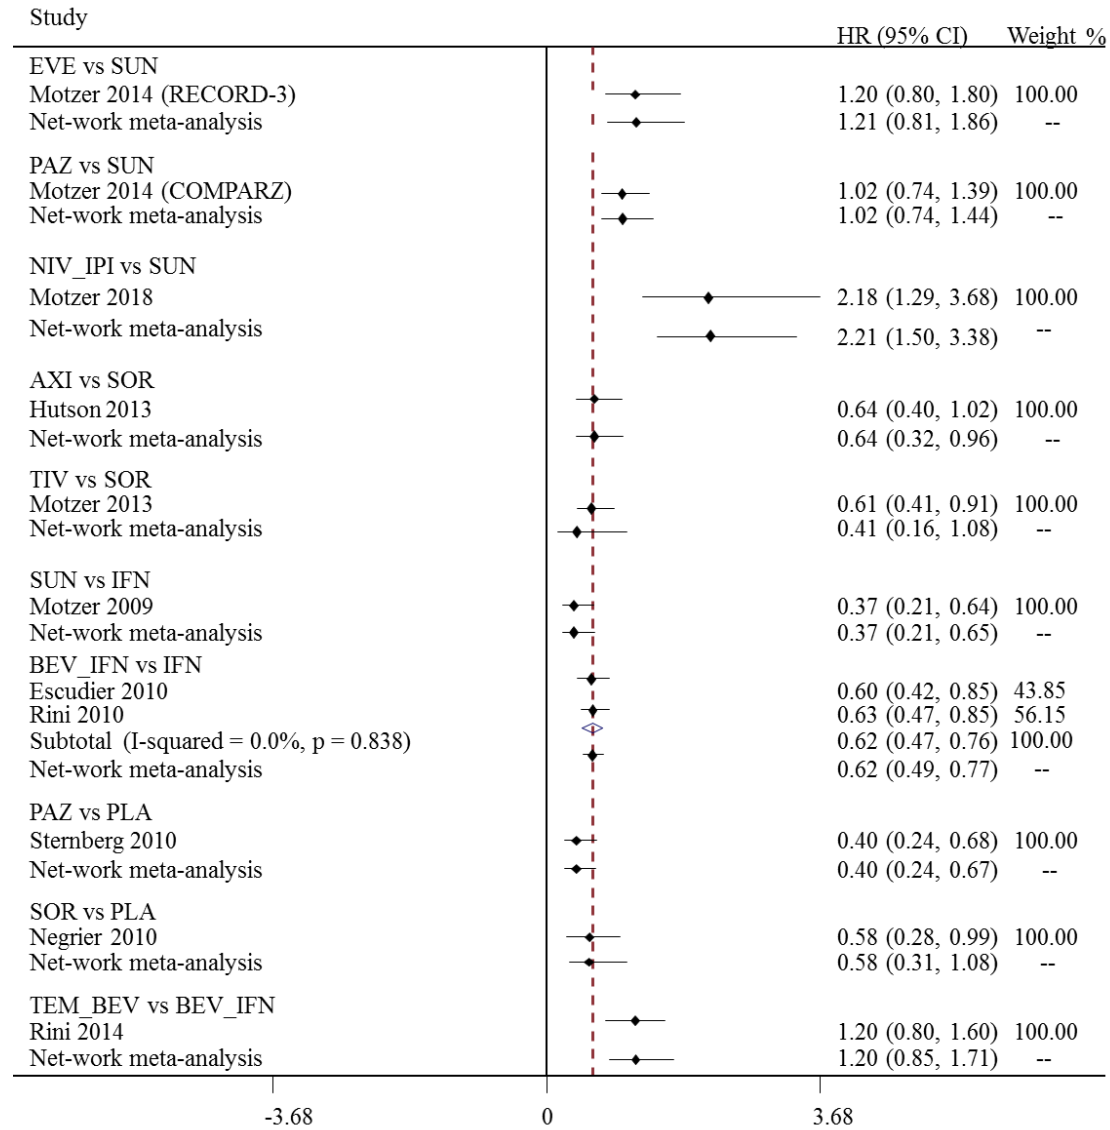

HR = hazard ratio. CI=confidence interval for traditional meta-analysis and credible interval for Bayesian network meta-analysis. SUN = sunitinib. PLA = placebo. IFN = interferon- $\alpha$ . SOR = sorafenib. PAZ = pazopanib. AXI = axitinib. EVE = everolimus. TIV = tivozanib. BEV\_IFN = bevacizumab plus interferon- $\alpha$ . TEM\_BEV = temsirolimus plus bevacizumab. NIV\_IPI = nivolumab plus ipilimumab.

Appendix figure 6 Cochrane risk of bias tool assessment

|                                 | Random sequence generation (selection bias) | Allocation concealment (selection bias) | Blinding of participants and personnel (performance bias) | Blinding of outcome assessment (detection bias) | Incomplete outcome data (attrition bias) | Selective reporting (reporting bias) | Other bias |
|---------------------------------|---------------------------------------------|-----------------------------------------|-----------------------------------------------------------|-------------------------------------------------|------------------------------------------|--------------------------------------|------------|
| Choueiri 2017                   | +                                           | +                                       | -                                                         | +                                               | +                                        | +                                    | ?          |
| Escudier 2010 (AVOREN)          | +                                           | +                                       | +                                                         | +                                               | +                                        | +                                    | ?          |
| Hutson 2013                     | +                                           | +                                       | -                                                         | +                                               | +                                        | +                                    | +          |
| Motzer 2009                     | +                                           | +                                       | -                                                         | ?                                               | +                                        | +                                    | +          |
| Motzer 2013                     | +                                           | +                                       | -                                                         | ?                                               | +                                        | +                                    | ?          |
| Motzer 2014 (COMPARZ)           | +                                           | +                                       | -                                                         | ?                                               | +                                        | +                                    | +          |
| Motzer 2014 (RECORD-3)          | +                                           | ?                                       | -                                                         | ?                                               | +                                        | +                                    | ?          |
| Motzer 2018 (CheckMate 214)     | +                                           | +                                       | ?                                                         | +                                               | +                                        | +                                    | ?          |
| Motzer 2019 (JAVELIN Renal 101) | +                                           | +                                       | -                                                         | +                                               | +                                        | +                                    | +          |
| Negrier 2010 (TARGET)           | +                                           | +                                       | +                                                         | +                                               | +                                        | +                                    | +          |
| Procopio 2013 (ROSORC)          | +                                           | +                                       | -                                                         | -                                               | +                                        | +                                    | ?          |
| Rini 2010 (CALGB 90206)         | +                                           | +                                       | +                                                         | +                                               | +                                        | +                                    | +          |
| Rini 2014 (INTORACT)            | +                                           | +                                       | -                                                         | +                                               | +                                        | +                                    | +          |
| Rini 2019 (KEYNOTE-426)         | +                                           | +                                       | -                                                         | +                                               | +                                        | +                                    | +          |
| Sternberg 2010 (VEG105192)      | +                                           | +                                       | +                                                         | +                                               | +                                        | +                                    | ?          |

**Appendix Table 1:** For advanced/metastatic RCC of favorable-risk, comparison of hazard ratios (95% CI) for **progression-free survival** from fixed and random models.

| Treatment compared with SUN | Fixed Model              | Random Model       |
|-----------------------------|--------------------------|--------------------|
| PLA                         | <b>2.54 (1.37- 4.70)</b> | 2.79 (0.005-4812)  |
| IFN                         | <b>2.69 (1.54-4.67)</b>  | 2.57 (0.05-18.24)  |
| SOR                         | 1.47 (0.61-3.49)         | 1.56 (0.001-2735)  |
| PAZ                         | 1.02 (0.74-1.39)         | 1.03 (0.05-142.4)  |
| AXI                         | 0.93 (0.33-2.54)         | 0.95 (0.001-22200) |
| EVE                         | 1.20 (0.80-1.80)         | 1.28 (0.03-66.05)  |
| BEV_IFN                     | 1.65 (0.90 -2.99)        | 1.54 (0.01-24.08)  |
| TEM_BEV                     | 1.98 (0.98 -3.96)        | 1.92 (0.02-155.90) |
| TIV                         | 0.89 (0.34-2.35)         | 0.96 (0.001-11940) |
| NIV_IPI                     | <b>2.18 (1.47-3.25)</b>  | 2.16 (0.05-52.46)  |
| PEM_AXI                     | 0.64 (0.24-1.69)         | 0.64 (0.01-64.60)  |
| AVE_AXI                     | <b>0.57 (0.34-0.96)</b>  | 0.57 (0.01-33.4)   |
| DIC                         | 9.68                     | 11.19              |

Numbers in parentheses indicate 95% credible intervals. SUN = sunitinib. PLA = placebo. IFN = interferon- $\alpha$ . SOR = sorafenib. PAZ = pazopanib. AXI = axitinib. EVE = everolimus. BEV\_IFN = bevacizumab plus interferon- $\alpha$ . TEM\_BEV = temsirolimus plus bevacizumab. TIV = tivozanib. NIV\_IPI = nivolumab plus ipilimumab, PEM\_AXI = pembrolizumab and axitinib, AVE\_AXI= avelumab plus axitinib. Bold type font indicates significant values.

**Appendix Table 2:** For advanced/metastatic RCC of intermediate-risk, comparison of hazard ratios (95% CI) for **progression-free survival** from fixed and random models.

| Treatment compared with SUN | Fixed Model             | Random Model        |
|-----------------------------|-------------------------|---------------------|
| PLA                         | <b>1.99 (1.29-3.14)</b> | 2.00 (0.01-1366)    |
| IFN                         | <b>2.57 (1.88-3.54)</b> | 2.56 (0.02-283)     |
| SOR                         | 0.95 (0.47-1.91)        | 0.95 (0.002- 5382)  |
| PAZ                         | 0.98 (0.80-1.18)        | 0.98 (0.02- 94.94)  |
| AXI                         | 0.80 (0.36-1.81)        | 0.80 (0.001- 7618)  |
| EVE                         | <b>1.50 (1.11-2.01)</b> | 1.50 (0.02-121.20)  |
| CAB                         | <b>0.63 (0.44-0.97)</b> | 0.65 (0.01- 64.02)  |
| BEV_IFN                     | <b>1.69 (1.18-2.41)</b> | 1.60 (0.01- 895.10) |
| TEM_BEV                     | <b>1.88 (1.22-2.81)</b> | 1.81 (0.002- 4299)  |
| TIV                         | 0.76 (0.36-1.65)        | 0.79 (0.001- 15210) |
| NIV_IPI                     | <b>0.66 (0.53-0.81)</b> | 0.67 (0.01- 64.51)  |
| PEM_AXI                     | <b>0.52 (0.35-0.81)</b> | 0.52 (0.02-10.67)   |
| AVE_AXI                     | <b>0.62 (0.47-0.83)</b> | 0.60 (0.02-10.67)   |
| DIC                         | 1.97                    | 2.92                |

Numbers in parentheses indicate 95% credible intervals. SUN = sunitinib. PLA = placebo. IFN = interferon- $\alpha$ . SOR = sorafenib. PAZ = pazopanib. AXI = axitinib. EVE = everolimus. CAB = cabozantinib. BEV\_IFN = bevacizumab plus interferon- $\alpha$ . TEM\_BEV = temsirolimus plus bevacizumab. TIV = tivozanib. NIV\_IPI = nivolumab plus ipilimumab, PEM\_AXI = pembrolizumab and axitinib, AVE\_AXI= avelumab plus axitinib. Bold type font indicates significant values.



**Appendix Table 3:** For advanced/metastatic RCC of poor-risk, comparison of hazard ratios (95% CI) for **progression-free survival** from fixed and random models.

| Treatment compared with SUN | Fixed Model             | Random Model        |
|-----------------------------|-------------------------|---------------------|
| IFN                         | 1.87 (0.81- 4.32)       | 1.88 (0.03- 137.70) |
| EVE                         | 1.73 (0.96- 2.99)       | 1.68 (0.02- 89.46)  |
| CAB                         | 0.74 (0.35-1.58)        | 0.75 (0.01- 54.64)  |
| BEV_IFN                     | 1.50 (0.60-3.62)        | 1.50 (0.01- 344.20) |
| TEM_BEV                     | 1.20 (0.42-3.30)        | 1.22 (0.001- 1196)  |
| NIV_IPI                     | <b>0.57 (0.43-0.76)</b> | 0.57 (0.01- 36.17)  |
| PEM_AXI                     | <b>0.43 (0.23-0.80)</b> | 0.44 (0.01-53.85)   |
| AVE_AXI                     | <b>0.55 (0.28-1.10)</b> | 0.55 (0.01-43.91)   |
| DIC                         | 9.91                    | 11.42               |

Numbers in parentheses indicate 95% credible intervals. SUN = sunitinib. IFN = interferon- $\alpha$ .

EVE = everolimus. CAB = cabozantinib. BEV\_IFN = bevacizumab plus interferon- $\alpha$ . TEM\_BEV

= temsirolimus plus bevacizumab. NIV\_IPI = nivolumab plus ipilimumab, PEM\_AXI =

pembrolizumab and axitinib, AVE\_AXI= avelumab plus axitinib. Bold type font indicates

significant values.

**Appendix Table 4:** Comparison of odds ratios (95% CI) for **high-grade adverse event** from consistency and inconsistency models.

| Treatment compared with SUN       | Consistency Model   | Inconsistency Model |
|-----------------------------------|---------------------|---------------------|
| PLA                               | 0.40 (0.02, 8.55)   | 0.39 (0.02, 8.91)   |
| SOR                               | 2.83 (0.06, 150.75) | 2.65 (0.05, 160.98) |
| PAZ                               | 1.07 (0.12, 9.19)   | 1.05 (0.12, 9.74)   |
| TIV                               | 1.98 (0.02, 201.54) | 1.85 (0.02, 209.34) |
| CAB                               | 0.92 (0.09, 8.13)   | 0.95 (0.09, 9.10)   |
| SOR_IL-2                          | 5.29 (0.06, 499.51) | 4.89 (0.05, 495.91) |
| NIV_IPI                           | 0.49 (0.05, 4.26)   | 0.50 (0.06, 4.41)   |
|                                   | 1.30 (0.15, 12.14)  | 1.30 (0.15, 13.03)  |
|                                   | 1.00 (0.11, 8.77)   | 0.98 (0.11, 8.56)   |
| Random Effects Standard Deviation | 0.85 (0.07, 1.69)   | 0.85 (0.07, 1.70)   |
| Inconsistency Standard Deviation  | NA                  | 0.87 (0.04, 1.70)   |

Numbers in parentheses indicate 95% credible intervals. SUN = sunitinib. PLA = placebo. SOR = sorafenib. PAZ = pazopanib. TIV = tivozanib. CAB = cabozantinib. SOR\_IL-2= sorafenib plus interleukin-2. NIV\_IPI = nivolumab plus ipilimumab, PEM\_AXI = pembrolizumab and axitinib, AVE\_AXI= avelumab plus axitinib. Stepwise comparison of treatments did not find significant differences in rates of high-grade adverse events.

**Appendix Table 5:** Comparison of odds ratios (95% CI) for **overall-grade adverse event** from consistency and inconsistency models.

| <b>Treatment compared with SUN</b> | <b>Consistency Model</b> | <b>Inconsistency Model</b> |
|------------------------------------|--------------------------|----------------------------|
| PAZ                                | 2.28 (0.27, 23.95)       | 2.25 (0.30, 24.19)         |
| CAB                                | 1.05 (0.03, 45.23)       | 1.14 (0.03, 61.85)         |
| NIV_IPI                            | 0.34 (0.08, 1.40)        | 0.33 (0.08, 1.37)          |
| PEM_AXI                            | 0.38 (0.05, 2.41)        | 0.41 (0.06, 2.56)          |
| AVE_AXI                            | 1.61 (0.17, 19.17)       | 1.60 (0.15, 18.66)         |
| Random Effects Standard Deviation  | 0.52 (0.04, 1.03)        | 0.53 (0.04, 1.02)          |
| Inconsistency Standard Deviation   | NA                       | 0.53 (0.02, 1.02)          |

Numbers in parentheses indicate 95% credible intervals. SUN = sunitinib. PAZ = pazopanib. CAB = cabozantinib. NIV\_IPI = nivolumab plus ipilimumab, PEM\_AXI = pembrolizumab and axitinib, AVE\_AXI= avelumab plus axitinib. Stepwise comparison of treatments did not find significant differences in rates of overall-grade adverse events.

**Appendix Table 6:** Comparison of results from primary analysis and sensitivity analysis for trials assessing approved targeted drugs.

| Treatment | Primary Analysis<br>PFS HR (95% CI) vs SUN | Sensitivity Analysis<br>PFS HR (95% CI) vs SUN |
|-----------|--------------------------------------------|------------------------------------------------|
| PLA       | <b>2.63 (1.47-4.71)</b>                    | <b>2.55 (1.38 -4.66)</b>                       |
| IFN       | <b>2.70 (1.59-4.51)</b>                    | <b>2.71 (1.55 -4.71)</b>                       |
| SOR       | 1.47 (0.61-3.59)                           | 1.48 (0.62 -3.55)                              |
| PAZ       | 1.03 (0.74-1.44)                           | 1.02 (0.75 -1.41)                              |
| AXI       | 0.98 (0.36-2.76)                           | 0.95 (0.35 -2.54)                              |
| EVE       | 1.21 (0.81-1.86)                           | 1.20 (0.80-1.80)                               |
| BEV_IFN   | 1.66 (0.94 -2.88)                          | 1.67 (0.92 -3.07)                              |
| TEM_BEV   | <b>1.96 (1.04 -3.63)</b>                   | <b>2.00 (1.01 -4.03)</b>                       |
| TIV       | 0.92 (0.37-2.33)                           | NA                                             |
| NIV_IPI   | <b>2.21 (1.50-3.38)</b>                    | <b>2.18 (1.46-3.20)</b>                        |

HR = hazard ratio. CI = confidence interval. Numbers in parentheses indicate 95% credible intervals. SUN = sunitinib. PLA = placebo. IFN = interferon- $\alpha$ . SOR = sorafenib. PAZ = pazopanib. AXI = axitinib. EVE = everolimus. BEV\_IFN = bevacizumab plus interferon- $\alpha$ . TEM\_BEV = temsirolimus plus bevacizumab. TIV = tivozanib. NIV\_IPI = nivolumab plus ipilimumab. Bold type font indicates significant values.

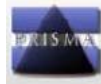

# PRISMA 2009 Checklist

| Section/topic                      | #  | Checklist item                                                                                                                                                                                                                                                                                              | Reported on page # |
|------------------------------------|----|-------------------------------------------------------------------------------------------------------------------------------------------------------------------------------------------------------------------------------------------------------------------------------------------------------------|--------------------|
| <b>TITLE</b>                       |    |                                                                                                                                                                                                                                                                                                             |                    |
| Title                              | 1  | Identify the report as a systematic review, meta-analysis, or both.                                                                                                                                                                                                                                         | 1                  |
| <b>ABSTRACT</b>                    |    |                                                                                                                                                                                                                                                                                                             |                    |
| Structured summary                 | 2  | Provide a structured summary including, as applicable: background; objectives; data sources; study eligibility criteria, participants, and interventions; study appraisal and synthesis methods; results; limitations; conclusions and implications of key findings; systematic review registration number. | 2                  |
| <b>INTRODUCTION</b>                |    |                                                                                                                                                                                                                                                                                                             |                    |
| Rationale                          | 3  | Describe the rationale for the review in the context of what is already known.                                                                                                                                                                                                                              | 5                  |
| Objectives                         | 4  | Provide an explicit statement of questions being addressed with reference to participants, interventions, comparisons, outcomes, and study design (PICOS).                                                                                                                                                  | 5                  |
| <b>METHODS</b>                     |    |                                                                                                                                                                                                                                                                                                             |                    |
| Protocol and registration          | 5  | Indicate if a review protocol exists, if and where it can be accessed (e.g., Web address), and, if available, provide registration information including registration number.                                                                                                                               | 5                  |
| Eligibility criteria               | 6  | Specify study characteristics (e.g., PICOS, length of follow-up) and report characteristics (e.g., years considered, language, publication status) used as criteria for eligibility, giving rationale.                                                                                                      | 5, 6               |
| Information sources                | 7  | Describe all information sources (e.g., databases with dates of coverage, contact with study authors to identify additional studies) in the search and date last searched.                                                                                                                                  | 5                  |
| Search                             | 8  | Present full electronic search strategy for at least one database, including any limits used, such that it could be repeated.                                                                                                                                                                               | 5                  |
| Study selection                    | 9  | State the process for selecting studies (i.e., screening, eligibility, included in systematic review, and, if applicable, included in the meta-analysis).                                                                                                                                                   | 5, 6               |
| Data collection process            | 10 | Describe method of data extraction from reports (e.g., piloted forms, independently, in duplicate) and any processes for obtaining and confirming data from investigators.                                                                                                                                  | 6                  |
| Data items                         | 11 | List and define all variables for which data were sought (e.g., PICOS, funding sources) and any assumptions and simplifications made.                                                                                                                                                                       | 6                  |
| Risk of bias in individual studies | 12 | Describe methods used for assessing risk of bias of individual studies (including specification of whether this was done at the study or outcome level), and how this information is to be used in any data synthesis.                                                                                      | 6                  |
| Summary measures                   | 13 | State the principal summary measures (e.g., risk ratio, difference in means).                                                                                                                                                                                                                               | 6                  |
| Synthesis of results               | 14 | Describe the methods of handling data and combining results of studies, if done, including measures of consistency (e.g., I <sup>2</sup> ) for each meta-analysis.                                                                                                                                          | 7                  |

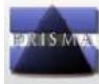

# PRISMA 2009 Checklist

Page 1 of 2

| Section/topic                 | #  | Checklist item                                                                                                                                                                                           | Reported on page # |
|-------------------------------|----|----------------------------------------------------------------------------------------------------------------------------------------------------------------------------------------------------------|--------------------|
| Risk of bias across studies   | 15 | Specify any assessment of risk of bias that may affect the cumulative evidence (e.g., publication bias, selective reporting within studies).                                                             | 6                  |
| Additional analyses           | 16 | Describe methods of additional analyses (e.g., sensitivity or subgroup analyses, meta-regression), if done, indicating which were pre-specified.                                                         | 7                  |
| <b>RESULTS</b>                |    |                                                                                                                                                                                                          |                    |
| Study selection               | 17 | Give numbers of studies screened, assessed for eligibility, and included in the review, with reasons for exclusions at each stage, ideally with a flow diagram.                                          | 8                  |
| Study characteristics         | 18 | For each study, present characteristics for which data were extracted (e.g., study size, PICOS, follow-up period) and provide the citations.                                                             | 8                  |
| Risk of bias within studies   | 19 | Present data on risk of bias of each study and, if available, any outcome level assessment (see item 12).                                                                                                | 8                  |
| Results of individual studies | 20 | For all outcomes considered (benefits or harms), present, for each study: (a) simple summary data for each intervention group (b) effect estimates and confidence intervals, ideally with a forest plot. | 8                  |
| Synthesis of results          | 21 | Present results of each meta-analysis done, including confidence intervals and measures of consistency.                                                                                                  | 8-10               |
| Risk of bias across studies   | 22 | Present results of any assessment of risk of bias across studies (see Item 15).                                                                                                                          | 11                 |
| Additional analysis           | 23 | Give results of additional analyses, if done (e.g., sensitivity or subgroup analyses, meta-regression [see Item 16]).                                                                                    | 11                 |
| <b>DISCUSSION</b>             |    |                                                                                                                                                                                                          |                    |
| Summary of evidence           | 24 | Summarize the main findings including the strength of evidence for each main outcome; consider their relevance to key groups (e.g., healthcare providers, users, and policy makers).                     | 11                 |
| Limitations                   | 25 | Discuss limitations at study and outcome level (e.g., risk of bias), and at review-level (e.g., incomplete retrieval of identified research, reporting bias).                                            | 15                 |
| Conclusions                   | 26 | Provide a general interpretation of the results in the context of other evidence, and implications for future research.                                                                                  | 15                 |
| <b>FUNDING</b>                |    |                                                                                                                                                                                                          |                    |
| Funding                       | 27 | Describe sources of funding for the systematic review and other support (e.g., supply of data); role of funders for the systematic review.                                                               | 16                 |

From: Moher D, Liberati A, Tetzlaff J, Altman DG, The PRISMA Group (2009). Preferred Reporting Items for Systematic Reviews and Meta-Analyses: The PRISMA Statement. PLoS Med 6(7): e1000097. doi:10.1371/journal.pmed1000097

For more information, visit: [www.prisma-statement.org](http://www.prisma-statement.org).

Page 2 of 2

For peer review only - <http://bmjopen.bmj.com/site/about/guidelines.xhtml>

# BMJ Open

## What's the optimum systemic treatment for advanced/metastatic renal cell carcinoma of favorable-, intermediate- and poor-risk, respectively? A systematic review and network meta-analysis

|                                 |                                                                                                                                                                                                                                                                                                                                                                                                                                                                                                               |
|---------------------------------|---------------------------------------------------------------------------------------------------------------------------------------------------------------------------------------------------------------------------------------------------------------------------------------------------------------------------------------------------------------------------------------------------------------------------------------------------------------------------------------------------------------|
| Journal:                        | <i>BMJ Open</i>                                                                                                                                                                                                                                                                                                                                                                                                                                                                                               |
| Manuscript ID                   | bmjopen-2019-034626.R2                                                                                                                                                                                                                                                                                                                                                                                                                                                                                        |
| Article Type:                   | Original research                                                                                                                                                                                                                                                                                                                                                                                                                                                                                             |
| Date Submitted by the Author:   | 04-May-2020                                                                                                                                                                                                                                                                                                                                                                                                                                                                                                   |
| Complete List of Authors:       | Cao, Guanghui; Henan Provincial People's Hospital<br>Wu, Xiaoqiang; Henan Provincial People's Hospital<br>Wang, Zhiwei; Henan Provincial People's Hospital<br>Tian, Xiangyong; Henan Provincial People's Hospital<br>Zhang, Chan; Henan Provincial People's Hospital, Department of Urology<br>Wu, Xuan; Henan Provincial People's Hospital<br>Zhang, Haotian; Henan Provincial People's Hospital<br>Jing, Gaopeng; Henan Provincial People's Hospital<br>Yan, Tianzhong; Henan Provincial People's Hospital, |
| <b>Primary Subject Heading</b>: | Urology                                                                                                                                                                                                                                                                                                                                                                                                                                                                                                       |
| Secondary Subject Heading:      | Oncology                                                                                                                                                                                                                                                                                                                                                                                                                                                                                                      |
| Keywords:                       | Urological tumours < UROLOGY, Kidney tumours < ONCOLOGY, IMMUNOLOGY                                                                                                                                                                                                                                                                                                                                                                                                                                           |
|                                 |                                                                                                                                                                                                                                                                                                                                                                                                                                                                                                               |

SCHOLARONE™  
Manuscripts



I, the Submitting Author has the right to grant and does grant on behalf of all authors of the Work (as defined in the below author licence), an exclusive licence and/or a non-exclusive licence for contributions from authors who are: i) UK Crown employees; ii) where BMJ has agreed a CC-BY licence shall apply, and/or iii) in accordance with the terms applicable for US Federal Government officers or employees acting as part of their official duties; on a worldwide, perpetual, irrevocable, royalty-free basis to BMJ Publishing Group Ltd ("BMJ") its licensees and where the relevant Journal is co-owned by BMJ to the co-owners of the Journal, to publish the Work in this journal and any other BMJ products and to exploit all rights, as set out in our [licence](#).

The Submitting Author accepts and understands that any supply made under these terms is made by BMJ to the Submitting Author unless you are acting as an employee on behalf of your employer or a postgraduate student of an affiliated institution which is paying any applicable article publishing charge ("APC") for Open Access articles. Where the Submitting Author wishes to make the Work available on an Open Access basis (and intends to pay the relevant APC), the terms of reuse of such Open Access shall be governed by a Creative Commons licence – details of these licences and which [Creative Commons](#) licence will apply to this Work are set out in our licence referred to above.

Other than as permitted in any relevant BMJ Author's Self Archiving Policies, I confirm this Work has not been accepted for publication elsewhere, is not being considered for publication elsewhere and does not duplicate material already published. I confirm all authors consent to publication of this Work and authorise the granting of this licence.



1  
2  
3  
4 **What's the optimum systemic treatment for advanced/metastatic**  
5  
6 **renal cell carcinoma of favorable-, intermediate- and poor-risk,**  
7  
8 **respectively? A systematic review and network meta-analysis**  
9  
10  
11  
12

13 Guanghui Cao, Xiaoqiang Wu, Zhiwei Wang, Xiangyong Tian, Chan Zhang, Xuan Wu, Haotian  
14 Zhang, Gaopeng Jing, Tianzhong Yan<sup>#</sup>  
15  
16

17  
18  
19 Department of Urology, Henan Provincial People's Hospital, Zhengzhou University People's  
20 Hospital, Zhengzhou 450003, China;  
21  
22

23  
24  
25 <sup>#</sup> Correspondence to Prof Tianzhong Yan PhD, Department of Urology, Henan Provincial People's  
26 Hospital, Zhengzhou University People's Hospital, Zhengzhou 450003, China.  
27  
28

29 E-mail address: ytz460@hotmail.com  
30

31 Tel.: + 86 731 87160355; fax: + 86 431 87160356.  
32  
33  
34  
35  
36  
37  
38  
39  
40  
41  
42  
43  
44  
45  
46  
47  
48  
49  
50  
51  
52  
53  
54  
55  
56  
57  
58  
59  
60

## ***Abstract***

***Purpose:*** The optimum systemic therapies for advanced/metastatic renal cell carcinoma (RCC) of favorable-, intermediate-, and poor-risk have not been established. We aimed to compare and rank the effects associated with systemic therapies in the first-line setting.

***Methods:*** We searched Pubmed, Cochrane databases, Web of Science, and ClinicalTrials.gov for randomized controlled trials (RCTs) published up to February 2020, of all available treatments for advanced/metastatic RCC. Analysis was done on a Bayesian framework.

***Results:*** 15 unique RCTs including 8 995 patients were identified. For advanced/metastatic RCC of favorable-risk, avelumab plus axitinib was associated with a significantly higher improvement in progression-free survival (PFS) than sunitinib (HR 0.57, 95% CI 0.34-0.96). For intermediate-risk patients, cabozantinib, nivolumab plus ipilimumab, pembrolizumab plus axitinib, and avelumab plus axitinib were associated with significantly higher improvement in PFS than sunitinib (HR 0.63, 95% CI 0.44-0.97; HR 0.66, 95% CI 0.53-0.81; HR 0.58, 95% CI 0.44-0.80; HR 0.62, 95% CI 0.47-0.83, respectively); pembrolizumab plus axitinib and nivolumab plus ipilimumab were associated with significantly higher improvement in overall survival (OS) than sunitinib (HR 0.53, 95% CI 0.34-0.81; HR 0.66, 95% CI 0.50-0.87, respectively). For poor-risk patients, nivolumab plus ipilimumab and pembrolizumab plus axitinib were associated with significantly higher improvement in PFS than sunitinib (HR 0.57, 95% CI 0.43-0.76; HR 0.48, 95% CI 0.30-0.82, respectively); nivolumab plus ipilimumab and pembrolizumab plus axitinib were significantly more efficacious for OS than sunitinib (HR 0.57, 95% CI 0.39-0.883; HR 0.43, 95% CI 0.23-0.80, respectively). For OS, there were 81% and 78% probabilities that pembrolizumab plus axitinib was the best option for intermediate-risk and poor-risk patients, respectively.

***Conclusion:*** Avelumab plus axitinib might be the optimum treatment for advanced/metastatic RCC of favorable-risk. Pembrolizumab plus axitinib might be the optimum treatment for intermediate-risk and poor-risk patients.

1  
2  
3  
4  
5 **Keywords:** renal cell carcinoma; systemic therapies; risk stratification; efficacy;  
6  
7 safety.  
8  
9

### 10 11 **Strengths and limitations of this study** 12

- 13 ▶ This is the first network analysis to compare systemic treatments for  
14 advanced/metastatic RCC separately by risk groups.  
15
- 16 ▶ Various statistical models were applied to synthesize data. The reliability and  
17 accuracy of results were corroborated by the low statistical heterogeneity and  
18 excellent model fit.  
19
- 20 ▶ Assessment of both efficacy and adverse events provides new insights into the  
21 benefit-harm balance of different systemic treatments.  
22
- 23 ▶ Main limitation lies in the reporting quality of trials included.  
24  
25  
26  
27  
28  
29  
30  
31  
32  
33  
34  
35  
36  
37  
38  
39  
40  
41  
42  
43  
44  
45  
46  
47  
48  
49  
50  
51  
52  
53  
54  
55  
56  
57  
58  
59  
60

## 1. Introduction

Renal cell carcinoma (RCC) comprises approximately 90% of renal cancer, and represents approximately 2-3% of all new cancers worldwide [1]. It was estimated that there would be 62 700 new cases of renal cancer and 14 240 renal cancer-related deaths in the United States in 2016 [2]. In the European Union, new renal cancer cases and deaths in 2012 were approximately 84 400 and 34 700, respectively [3]. Up to 30% of patients were presented with advanced /metastatic RCC at the time of initial diagnosis [4 5]. Advanced/metastatic RCC is not a single condition, but is actually a heterogeneous group of conditions with different prognosis. The most widely accepted prognostic model is from the Memorial Sloan Kettering Cancer Center (MSKCC) and stratifies patients into favorable-, intermediate-, and poor-risk groups depending on the existence of well-characterized laboratory and clinical risk factors. The 2-year survival rates were 45%, 17%, and 3% for favorable-, intermediate-, and poor-risk groups, respectively [6]. In this systematic review, we focus on favorable-, intermediate-, and poor-risk patients with advanced/metastatic RCC.

In recent years, systemic treatment for advanced/metastatic RCC has changed from cytokines to drugs targeting angiogenesis. In 2007, results from two RCTs have been published reporting progress-free survival improvement of two newer targeted agents (sunitinib and sorafenib)[7 8]. To date, eight targeted drugs have been approved for treating advanced/metastatic RCC both in USA and Europe: five tyrosine kinase inhibitors (TKIs): sunitinib, sorafenib, pazopanib, cabozantinib, and axitinib; two mammalian target of rapamycin (mTOR) complex 1 kinase inhibitors: temsirolimus, and everolimus; and the recombinant humanized antivascular endothelial growth factor (VEGF) monoclonal antibody bevacizumab combined with interferon- $\alpha$  (IFN- $\alpha$ ). All eight targeted drugs showed significant survival benefit in randomized trials and established a prominent role in treating advanced/metastatic RCC [7 9-15]. More recently, immune checkpoint antibodies have introduced a new treatment option. CheckMate 214 reported that nivolumab plus ipilimumab was associated with a significantly higher overall survival than sunitinib in the first-line setting [16]. To further improve their efficacy, the combination of different classes of agents is

1  
2  
3  
4 currently evaluated in clinical trials [17-20]. However, there are insufficient  
5  
6 head-to-head RCTs to directly investigate the comparative effectiveness of all  
7  
8 available therapies. Given the variety of treatment options for patients  
9  
10 advanced/metastatic RCC and the limited evidence regarding the optimum treatment  
11  
12 strategy, it is a challenge for clinicians to make the best decision.

13  
14 In the present study, we performed a Bayesian network meta-analysis to compare  
15  
16 first-line systemic treatments for advanced/metastatic RCC of favorable-,  
17  
18 intermediate-, and poor-risk, respectively. Network meta-analysis enables indirect  
19  
20 comparisons based on a common comparator treatment when a head-to-head trial is  
21  
22 unavailable and integrates direct and indirect comparisons to compare several  
23  
24 treatment strategies while fully respecting randomization [21 22]. We aimed to  
25  
26 summarize and compare the efficacy and safety associated with currently available  
27  
28 systemic therapies for treating advanced/metastatic RCC of different risk categories  
29  
30 using network meta-analysis.

## 31 32 33 **2. Methods**

### 34 35 *2.1. Literature-search strategy*

36  
37 A comprehensive literature search was performed in Pubmed, Web of Science,  
38  
39 ClinicalTrials.gov, and Cochrane databases for RCTs of systemic therapies of  
40  
41 advanced/metastatic RCC (appendix for all search terms). All the reference lists of  
42  
43 identified trials and related reviews were examined to find potential trials. The search  
44  
45 was conducted in February 2020. There were no publication date or language  
46  
47 restrictions.

### 48 49 50 *2.2. Inclusion and exclusion criteria*

51  
52 All studies were selected according to the search strategy based on Preferred  
53  
54 Reporting Items for Systematic Reviews and Meta-analyses criteria [23]. Studies were  
55  
56 included if they satisfied three criteria: (1) the study enrolled patients who had  
57  
58 histologically or cytologically confirmed advanced/metastatic RCC of favorable-,  
59  
60 intermediate-, or poor-risk; (2) patients were randomly assigned to receive systemic

1  
2  
3  
4 therapies alone or in combination. Relevant interventions included, but were not  
5 restricted to: sorafenib, sunitinib, pazopanib, cabozantinib, nivolumab, ipilimumab,  
6 axitinib, tivozanib, everolimus, temsirolimus, or bevacizumab plus IFN- $\alpha$ . Previous  
7 systemic therapy for advanced/metastatic RCC was not allowed; (3) one or more of  
8 the outcomes of interest mentioned below were reported. Nonoriginal articles,  
9 duplicate reports and non-RCTs were excluded.  
10  
11  
12  
13  
14  
15  
16

### 17 *2.3. Data Extraction and Quality Assessment*

18  
19 Two researchers (GH. Cao and XQ. Wu) examined the manuscripts of included  
20 trials independently, and extracted data into a structured form, including patient  
21 characteristics, treatment strategies, and interest outcomes [progress free survival  
22 (PFS), overall survival (OS), high-grade (grade  $\geq 3$ ) and overall drug-related adverse  
23 events]. The patient characteristics, treatment strategies, PFS and OS were extracted  
24 at the study-level for meta-analyses even if the patient-level were available. For  
25 drug-related adverse events, the patient-level data were extracted for meta-analyses.  
26 We gave priority to extracting data from intention-to-treat analyses. The  
27 methodological quality of included RCTs was assessed using the Cochrane risk of  
28 bias assessment tool [24]. Disagreement between investigators was resolved by  
29 consensus.  
30  
31  
32  
33  
34  
35  
36  
37  
38  
39  
40  
41  
42

### 43 *2.4. Data synthesis and analysis*

44  
45 First, we performed traditional meta-analyses to compare the treatments using Stata  
46 v.12 (StataCorp, College Station, TX, USA). We applied the chi-square test and the  $I^2$   
47 statistic to investigate the possibility of heterogeneity among studies. A P value  $< 0.10$   
48 or an  $I^2 > 50\%$  suggested the presence of substantial heterogeneity.  
49  
50  
51

52  
53 Second, we did Bayesian network meta-analyses. For meta-analysis of PFS and OS,  
54 the reported adjusted hazard ratios (HRs) with 95% CIs were applied as the outcome  
55 measure. For studies not reporting HRs, we calculated them from Kaplan-Meier curve  
56 and information on follow-up with the pragmatic approach reported by Tierney et al  
57 [25]. For drug-related adverse events, we calculated odds ratios (ORs) using the  
58  
59  
60

1  
2  
3  
4 available patient-level data abstracted from the trials. Both random-effects and  
5 fixed-effects models were performed for all Bayesian network meta-analyses [26].  
6  
7 Goodness of model fit was assessed using the deviance information criterion and  
8  
9 between-study standard deviation [26 27]. Convergence was determined graphically  
10  
11 according to the method described by Gelman *et al* [28].  
12

13  
14 It is believed that certain systemic treatments are effective in certain risk groups  
15 than others, for example sunitinib is more effective in favorable-risk patients and  
16 nivolumab plus ipilimumab is more effective in intermediate and poor-risk patients  
17 [29], suggesting that there is a treatment-by-risk group (favorable-, intermediate-, and  
18 poor-risk groups) interaction. Taking no account of this possible interaction in the  
19 analysis, transitivity assumption across all included trials would be violated.  
20  
21 Therefore, we performed all network analyses separately by risk groups (favorable-,  
22 intermediate-, and poor-risk groups) according to the MSKCC or IMDC risk model to  
23 assure transitivity assumption.  
24  
25  
26  
27  
28  
29

30  
31 One key assumption for network analysis is that direct and indirect comparisons do  
32 not disagree beyond chance [26 30]. To explore for evidence of inconsistency in the  
33 network, investigators compared the estimated treatment effects from the entire  
34 network with traditional pair-wise estimates [30]. Sensitivity analyses were performed  
35 restricted to trials that assessed approved systemic therapies (sunitinib, sorafenib,  
36 pazopanib, cabozantinib, axitinib, everolimus, temsirolimus, bevacizumab plus IFN- $\alpha$ ,  
37 and nivolumab plus ipilimumab). Publication bias and small-study effects were  
38 assessed using funnel plots [31].  
39  
40  
41  
42  
43  
44  
45

46  
47 We performed the Bayesian network analysis using OpenBUGS version 3.2.2 for  
48 PFS, and Gemtc version 0.14.3 (van Valkenhoef *et al*, 2012) for adverse events. We  
49 performed fewer iterations for PFS to reduce computational burden without loss of  
50 convergence and model fit. For PFS, we applied 15 000 iterations obtained after a  
51 training phase of 10 000-iteration. In order to minimize autocorrelation, we applied a  
52 thinning interval of 50 for each chain. For adverse events, we applied the 60 000  
53 iterations after a training phase of 40 000 iterations. The treatments were ranked in  
54 terms of PFS, OS, and high-grade AEs, respectively, using the surface under the  
55  
56  
57  
58  
59  
60

1  
2  
3  
4 cumulative ranking curve (SUCRA) and the distribution of the ranking probabilities  
5  
6 [32].  
7  
8  
9

### 10 11 **3. Results** 12

#### 13 14 *3.1. Search results and study characteristics* 15

16 The literature search yielded 2 017 potentially eligible studies, of which 1 873 were  
17 excluded based on screening titles and abstracts (Fig. 1). The full text of 144  
18 remaining studies were analyzed, and finally 21 publications reporting 15 unique  
19 RCTs were included (Table), involving 8 995 participants randomly assigned to one  
20 of the 13 treatment strategies: sorafenib, sunitinib, pazopanib, cabozantinib,  
21 nivolumab plus ipilimumab, axitinib, tivozanib, everolimus, IFN- $\alpha$ , bevacizumab plus  
22 IFN- $\alpha$ , temsirolimus plus bevacizumab, avelumab plus axitinib, and pembrolizumab  
23 and axitinib. According to the MSKCC or IMDC criteria, there were 2 783, 5 474 and  
24 721 participants had favorable-, intermediate-, and poor-risk disease, respectively.  
25  
26  
27  
28  
29  
30  
31  
32

33 The main characteristics of included RCTs are summarized in Table. The  
34 demographic characteristics of patients were well balanced across trials. Enrolled  
35 patients across trials were similar in terms of age, gender, and risk classification.  
36 Across trials, the median age of patients ranged from 58 to 64 years. The participants  
37 were predominantly male (71.7%, 6 451 of 8 995). The included trials were designed  
38 similarly. Median follow-up ranged from 10.7 to 58 months. The mean sample sizes  
39 were 100, 192 and 32 patients per group for favorable-, intermediate- and poor-risk  
40 subtypes, respectively. Thirteen trials selected for clear-cell carcinoma subtypes  
41 [10-12 15 16 33-40], and two trials also included small subsets of non-clear-cell  
42 histotypes, each comprising 11% and 14% of the study population, respectively [41  
43 42]. All studies were two-arm trials. The dosages used in most of trials were within  
44 the recommended dose ranges.  
45  
46  
47  
48  
49  
50  
51  
52  
53  
54  
55

56 In this network meta-analysis, results are reported based on fixed-effects models  
57 because they demonstrated better goodness of fit compared with random-effects  
58  
59  
60



1  
2  
3  
4 models. The results of random-effects models are available in appendix Table 1-5.  
5  
6

### 7 8 *3.2. Progression-free survival*

9  
10 *3.2.1.* For advanced/metastatic RCC of favorable-risk, 13 trials enrolling 2 514 total  
11 patients reported adequate information on progression-free survival and contributed to  
12 network meta-analysis (Fig. 2A)[10-13 15 16 34-37 39-42]. Fig. 2B summarizes the  
13 results of the network meta-analysis for PFS. Compared with sunitinib, IFN- $\alpha$  and  
14 nivolumab plus ipilimumab were associated with significantly worse PFS (HR 2.69,  
15 95% CI 1.54-4.67; and HR 2.18, 95% CI 1.47-3.25, respectively). Network  
16 meta-analysis showed that only avelumab plus axitinib was associated with a  
17 significantly higher improvement in PFS than sunitinib (HR 0.57, 95% CI 0.34-0.96).  
18 Based on the results of ranking, there was a 45% chance that avelumab plus axitinib  
19 provided the greatest PFS benefit for patients with favorable-risk disease (SUCRA =  
20 92.3%)(Fig. 2C).  
21  
22

23  
24  
25  
26  
27  
28  
29  
30  
31  
32  
33 *3.2.2.* For advanced/metastatic RCC of intermediate-risk, 14 trials enrolling 5 473  
34 total patients contributed to the analysis of PFS (Fig. 3A) [10-13 15 16 33-37 39 40  
35 42]. Network meta-analysis demonstrated that cabozantinib, nivolumab plus  
36 ipilimumab, pembrolizumab plus axitinib, and avelumab plus axitinib were associated  
37 with significantly higher improvement in PFS than sunitinib (HR 0.63, 95% CI  
38 0.44-0.97; HR 0.66, 95% CI 0.53-0.81; HR 0.58, 95% CI 0.44-0.80; HR 0.62, 95% CI  
39 0.47-0.83, respectively). Everolimus, bevacizumab plus IFN- $\alpha$ , and temsirolimus plus  
40 bevacizumab were significantly less efficacious for PFS than sunitinib (HR 1.50, 95%  
41 CI 1.11-2.01; HR 1.69, 95% CI 1.18-2.41; HR 1.88, 95% CI 1.22-2.81, respectively)  
42 (Fig. 3B). Based on the analysis of ranking, pembrolizumab plus axitinib had the  
43 highest probability (49%) to be the best treatment for intermediate-risk patients  
44 (SUCRA = 90.7%). Avelumab plus axitinib and cabozantinib had a similar likelihood  
45 of being the second-best option for patients with intermediate-risk disease (Fig. 3C).  
46  
47  
48  
49  
50  
51  
52  
53  
54  
55  
56  
57  
58  
59  
60

*3.2.3.* Based on data that was available for advanced/metastatic RCC of poor-risk, the

1  
2  
3  
4 network involved seven trials comparing nine different treatments (721 total patients;  
5 Fig. 4A) [15 16 33-35 37 39 40 42]. Network meta-analysis demonstrated that  
6 nivolumab plus ipilimumab and pembrolizumab plus axitinib were associated with  
7 significantly higher improvement in PFS than sunitinib (HR 0.57, 95% CI 0.43-0.76;  
8 HR 0.48, 95% CI 0.30-0.82, respectively) (Fig. 4B). On the base of ranking analysis,  
9 there was a 60% probability that pembrolizumab plus axitinib had the greatest PFS for  
10 poor-risk patients (SUCRA = 91.3%) (Fig. 4C).  
11  
12  
13  
14  
15  
16  
17  
18

### 19 3.3. Overall survival

20 Five RCTs reported OS according to risk subgroups, and data from three of them  
21 contributed to the network meta-analysis (572, 1801, and 407 patients for favorable-,  
22 intermediate-, and poor-risk, respectively)[16 38 39]. For advanced/metastatic RCC of  
23 favorable-risk, there is no significant OS benefit between sunitinib and pazopanib  
24 (HR 0.88, 95% CI 0.64-1.21) or pembrolizumab plus axitinib (HR 0.64, 95% CI  
25 0.24-1.70) (Fig. 5A). For intermediate-risk patients, pembrolizumab plus axitinib and  
26 nivolumab plus ipilimumab were associated with significantly higher improvement in  
27 OS than sunitinib (HR 0.53, 95% CI 0.34-0.81; HR 0.66, 95% CI 0.50-0.87,  
28 respectively)(Fig. 5B). For advanced/metastatic RCC of poor-risk, pembrolizumab  
29 plus axitinib and nivolumab plus ipilimumab were significantly more efficacious for  
30 OS than sunitinib (HR 0.43, 95% CI 0.23-0.80; HR 0.57, 95% CI 0.39-0.83,  
31 respectively) (Fig. 5C). Based on the results of ranking, there were 81% and 78%  
32 probabilities for pembrolizumab plus axitinib to be the best choice for intermediate-  
33 and poor-risk patients, respectively (SUCRA =93.1% ; SUCRA= 91.4%, respectively)  
34 (appendix Fig.1-3).  
35  
36  
37  
38  
39  
40  
41  
42  
43  
44  
45  
46  
47  
48  
49  
50

### 51 3.4. Adverse events

52 Nine trials contributed to our analysis of overall and high-grade drug-related adverse  
53 events [10 11 13 15 16 36 39-41]. All the nine trials did not provide adverse events  
54 data for different risk groups, so we extracted a summary of adverse event data.  
55  
56  
57  
58  
59

60 Results of comparisons of adverse events of nine systemic treatments are presented in

1  
2  
3  
4 Fig. 6 and appendix Fig. 4 Stepwise comparison of all the seven therapies did not find  
5 significant differences in rates of high-grade or overall adverse events. The most  
6 common adverse events included diarrhea, hypertension, fatigue, and decreased  
7 appetite.  
8  
9  
10

### 11 12 13 *3.5. Network assumptions, sensitivity analysis, publication bias, and risk of bias*

14 Consistencies between direct and indirect evidence were noted for any comparisons  
15 (appendix Fig. 5 and appendix Table 1-5). Results from the sensitivity analyses were  
16 in line with the primary analysis (appendix Table 6). The comparison-adjusted funnel  
17 plot (Fig. 7) for PFS was largely symmetric, indicating no obvious small-study effects  
18 and publication bias. The methodological quality was moderate in the included studies  
19 (appendix Fig. 6). All trials were thought to have low risk of bias for random  
20 sequence generation, incomplete outcome data, and selective reporting of outcomes.  
21 Ten trials had evidence of high risk of bias for masking [12 13 15 35-37 39-42].  
22  
23  
24  
25  
26  
27  
28  
29  
30  
31

## 32 **4. Discussion**

33 Our network meta-analysis of 15 RCTs including 8 995 individuals assessed the  
34 efficacy and safety of all major systematic therapies for the treatment of  
35 advanced/metastatic RCC in the first-line setting. Findings of this meta-analysis might  
36 help to choose among systemic agents for the management of patients with previously  
37 untreated advanced/metastatic RCC. In terms of PFS, avelumab plus axitinib was  
38 most likely to be the best treatment regimen for advanced/metastatic RCC of  
39 favorable-risk, and pembrolizumab plus axitinib seemed to be the most efficacious  
40 treatment strategy for patients with intermediate- and poor-risk. In terms of OS, there  
41 were no significant differences among systematic therapies for advanced/metastatic  
42 RCC of favorable-risk, and pembrolizumab plus axitinib was probably to be the best  
43 option for patients with intermediate- and poor-risk. In terms of drug-related adverse  
44 events, there were no significant differences among systemic therapies.  
45  
46  
47  
48  
49  
50  
51  
52  
53  
54  
55  
56

57 In RCC with clear cell subtype, hypoxia-inducible factor (HIF) accumulation due to  
58 loss of von Hippel-Lindau (VHL) leads to overexpression of VEGF and platelet  
59  
60

1  
2  
3  
4 derived growth factor (PDGF), which promotes tumor angiogenesis [43 44]. This  
5 process substantially makes a contribution to the development and progression of  
6 clear cell RCC. Inhibiting the VEGF signaling has been supposed as the key  
7 mechanism for antitumor effects in clear cell RCC. To date, eight targeted drugs have  
8 been approved for treating advanced RCC: sunitinib, sorafenib, pazopanib,  
9 cabozantinib, axitinib, everolimus, temsirolimus, and bevacizumab (in combination  
10 with IFN- $\alpha$ ).  
11  
12  
13  
14  
15  
16

17 As shown in this analysis, for patients with intermediate-risk, sunitinib resulted in a  
18 significant PFS benefit compared with everolimus. The varied clinical benefit could  
19 be associated with mechanisms of action of TKI and mTOR inhibitor. Sunitinib not  
20 only inhibit VEGF receptors -1, -2, and -3, which may be the most clearly relevant  
21 targets in RCC so far, but also exhibit potent activity against PDGF receptor[11 45]. It  
22 has been reported that PDGF plays a critical role in the recruitment of pericytes to  
23 sprouting tumor vessels, and pericyte-covered vessels are more likely resistant to  
24 anti-vascular therapy than those pericyte-negative vessels [46 47]. The mTOR  
25 complex is the upstream of an intracellular signaling network regulating cell growth  
26 and angiogenesis, and it plays a key role in the pathogenesis of advanced/metastatic  
27 RCC [48]. It has been demonstrated that rapamycin analogs, including everolimus and  
28 temsirolimus, inhibit only one of two signaling complexes of mTOR [49]. The  
29 mTORC1 signaling is potently inhibited by everolimus and temsirolimus, while the  
30 mTORC2 signaling is not [50]. Consequently, one downstream signaling of mTOR  
31 activation is unopposed. The relatively unsatisfactory efficacy should disable the  
32 mTOR inhibitors as more suitable therapies for the treatment of advanced/metastatic  
33 RCC than TKIs. Regarding TKIs, our results suggest that sunitinib was most likely to  
34 be the best treatment regimen for patients with favorable-risk disease.  
35  
36  
37  
38  
39  
40  
41  
42  
43  
44  
45  
46  
47  
48  
49  
50  
51

52 A potentially additive benefit from combinations of targeted drugs has been  
53 suggested on the basis that they inhibit separate cellular pathways. However, our  
54 results show that temsirolimus plus bevacizumab, and bevacizumab plus IFN- $\alpha$   
55 provide little survival benefit compared with sunitinib, further confirming absence of  
56 evidence that combination treatment simultaneously inhibiting both VEGF and  
57  
58  
59  
60

1  
2  
3  
4 mTOR signaling results in therapeutic synergy [18 20 37].

5  
6 Immune checkpoint antibodies block the inhibitory T-cell receptor programmed  
7 death-1 (PD-1) or cytotoxic T-lymphocyte antigen 4 (CTLA-4)-signaling to augment  
8 tumor specific immune response [51]. Nivolumab (an anti-PD-1 antibody) is  
9 approved for the treatment of advanced RCC in the second line setting. Ipilimumab  
10 (an anti-CTLA-4 antibody) is approved for the treatment of advanced melanoma.  
11 Nivolumab plus ipilimumab has been reported significant efficacy in multiple tumor  
12 types [52 53]. In this analysis, pembrolizumab plus axitinib appeared to be the  
13 optimum treatment for intermediate- and poor-risk patients. Single-agent anti-tumor  
14 activity of pembrolizumab and axitinib for mRCC has been reported in previous  
15 studies [12 54]. Accordingly, axitinib in combination with pembrolizumab was  
16 assessed and contributed to objective response rate in 73% patients in a phase 1b trial  
17 [55]. Our result was consistent with results of KEYNOTE-426 trial, demonstrating  
18 that pembrolizumab plus axitinib resulted in significant OS and PFS benefit compared  
19 with sunitinib [39]. In addition, the survival benefit of pembrolizumab plus axitinib  
20 was observed independent of PD-L1 status [39].

21  
22  
23  
24  
25  
26  
27  
28  
29  
30  
31  
32  
33  
34  
35 Pembrolizumab plus axitinib is a combination of anti-PD-1 monoclonal antibody  
36 and VEGF receptor TKI. Immune checkpoint inhibitors (ICI) block the inhibitory  
37 T-cell receptor PD-1 or CTLA-4-signaling to augment tumor specific immune  
38 response [51]. Besides of antiangiogenic effects, VEGF inhibition could enhance the  
39 recruitment and infiltration of immune cells into the tumors [56 57]. It's reported that  
40 simultaneous blockade of PD-1 and VEGF receptor-2 induced decreased tumor  
41 neovascularization and tumor inhibition in a murine model [58]. These studies  
42 suggested that the combination of ICI and VEGF receptor inhibitors could provide  
43 enhanced benefit for mRCC. Recently, in addition to pembrolizumab plus axitinib,  
44 avelumab (anti-PD-L1 antibody) plus axitinib, and atezolizumab (anti-PD-L1  
45 antibody) plus bevacizumab were respectively assessed in two phase 3 RCTs  
46 (IMmotion 151 and JAVELIN Renal 101), and both of them showed significant  
47 survival benefit for mRCC compared with sunitinib [39 59]. However, there is no  
48 head-to-head trial comparing combinations of ICI and VEGF receptor inhibitors  
49  
50  
51  
52  
53  
54  
55  
56  
57  
58  
59  
60

1  
2  
3  
4 inhibitors (pembrolizumab plus axitinib, aveluma plus axitinib, and atezolizumab plus  
5 bevacizumab) directly. In consistent with our previous study, the present analysis  
6 revealed that pembrolizumab plus axitinib presented the highest OS benefit for  
7 intermediate- and poor-risk patients. For advanced/metastatic RCC of favorable-risk,  
8 only avelumab plus axitinib was associated with a significantly higher improvement  
9 in PFS than sunitinib, suggesting avelumab plus axitinib might be the optimum  
10 treatment for favorable-risk patients. Considering patients continued to be followed  
11 for OS in the JAVELIN Renal 101 trial [40], the real OS benefit for avelumab plus  
12 axitinib over sunitinib requires additional follow-up.

21 Recently, several network meta-analyses were attempted to investigate the  
22 comparative effects of different systemic agents for treatment of advanced/metastatic  
23 RCC [60-63]. However, trials included in the meta-analyses enrolled patients with  
24 different risk groups. The analysis used aggregate data and did not perform subgroup  
25 analysis based on risk strata. In the present study, we performed a network  
26 meta-analysis to compare first-line systemic treatments for advanced/metastatic RCC  
27 of favorable-, intermediate-, and poor-risk, respectively, thus providing physicians  
28 with the optimal treatment for different risk groups.

37 The strengths of our study are as follows. To the best of our knowledge, this study  
38 is the first network analysis to compare systemic treatments for advanced/metastatic  
39 RCC separately by risk groups. We applied multiple rigorous search strategies to  
40 retrieve all potentially eligible RCTs. In the present study, we comprehensively  
41 compared and ranked all available first-line systemic therapies for  
42 advanced/metastatic RCC of favorable-, intermediate-, and poor-risk, respectively,  
43 thus providing physicians with an overall appraisal of systemic therapies for different  
44 risk groups. In addition, we used Bayesian network meta-analysis to synthesize data.  
45 This approach provides indirect effect estimates in the absence of head-to-head trial  
46 and incorporates all available information from RCTs while fully maintaining  
47 randomization [21 22]. We applied various statistical models to increase reliability of  
48 the results. Results were consistent across all analyzed outcomes. Moreover, the  
49 reliability and accuracy of results were corroborated by the low statistical  
50  
51  
52  
53  
54  
55  
56  
57  
58  
59  
60

1  
2  
3  
4 heterogeneity and excellent model fit. Finally, assessment of both efficacy and  
5  
6 adverse events provides new insights into the benefit-harm balance of different  
7  
8 systemic treatments.

9  
10 However, the limitations of our study must be taken into account. The major  
11  
12 limitation of this network meta-analysis lies in the reporting quality of trials reviewed.  
13  
14 Ten included trials were not masked, which might affect the validity of our findings.  
15  
16 In addition, three included trials (CABOSUN, ROSORC, and RECORD-3) are phase  
17  
18 2 RCTs with smaller sample size, and they may be less authoritative compared with  
19  
20 phase 3 RCTs. Moreover, most of the trials did not perform the analysis of OS in risk  
21  
22 subgroup, which made it impossible to assess the OS benefits of all the existing  
23  
24 treatments for different risk patients. In addition, this meta-analysis was conducted  
25  
26 based on summary statistics rather than individual patient level data. There might be  
27  
28 some confounding factors (*e.g.*, ethnic origin, prior nephrectomy, *etc.*) at the  
29  
30 individual patient level that might influence the benefit of systemic treatments, but  
31  
32 were not available; therefore analyses adjusted for these factors were impossible in  
33  
34 our network meta-analysis. Access to patient-level longitudinal data would allow us to  
35  
36 establish more robust and accurate conclusions in specific subgroups of patients.  
37  
38 Moreover, the length of follow-up varied across studies, resulting in potential  
39  
40 variations in survival benefits and adverse events. Due to only eight trials reporting  
41  
42 median follow-up, sensitivity analyses adjusted for this factor were impossible.  
43  
44 Moreover, individual dosage varied across studies and data were too sparse to  
45  
46 investigate effects of different schedules, which might somewhat affect the  
47  
48 generalisability of our findings. Since the analysis was based on highly selected RCTs  
49  
50 and the results were based on fixed-effects models, findings in this analysis may not  
51  
52 be entirely generalized to real-world practice. Finally, findings in this meta-analysis  
53  
54 were mainly based on patients with clear-cell advanced RCC, thus no robust  
55  
56 recommendations can be provided for non-clear-cell subtypes. Two trials included  
57  
58 small subsets of non-clear-cell histotypes (11% and 14% of the study population),  
59  
60 which might somewhat damage the results of our analysis.

## 5. Conclusions

Our network meta-analysis suggested that: avelumab plus axitinib might be the optimum treatment for advanced/metastatic RCC of favorable-risk; pembrolizumab plus axitinib was most likely to be the best option for intermediate- and poor-risk patients. Further well-designed, large-scale RCTs are required to confirm and update the findings of this analysis.

## Author Contributions

G-HC and X-QW conceived and designed the meta-analysis, Z-ZW and X-YT identified and acquired reports of trials, and extracted data. XW and H-TZ analyzed and interpreted the data. CZ and G-PJ contacted authors of trials for additional information. G-HC and X-QW drafted the manuscript. T-ZY critically reviewed the manuscript. All authors approved the final submitted version of the report.

**Fundings:** This research was supported by the Henan Provincial Medical Scientific and Technological Research Project (Grant No. 201702191). The sponsor had no role in study design, data collection, data analysis, data interpretation, or writing of the report.

**Conflicts of Interest:** None declared.

## Data Availability Statement

All data relevant to the study are included in the article or uploaded as supplementary information.

## Patient and Public Involvement

Patients or the public WERE NOT involved in the design, or conduct, or reporting, or dissemination of our research.



## References:

1. Ljungberg B, Bensalah K, Canfield S, et al. EAU guidelines on renal cell carcinoma: 2014 update. *Eur Urol* 2015;67(5):913-24.
2. Siegel RL, Miller KD, Jemal A. Cancer statistics, 2016. *CA Cancer J Clin* 2016;66(1):7-30.
3. Ferlay J, Steliarova-Foucher E, Lortet-Tieulent J, et al. Cancer incidence and mortality patterns in Europe: estimates for 40 countries in 2012. *Eur J Cancer* 2013;49(6):1374-403.
4. Janzen NK, Kim HL, Figlin RA, et al. Surveillance after radical or partial nephrectomy for localized renal cell carcinoma and management of recurrent disease. *Urol Clin North Am* 2003;30(4):843-52.
5. Cohen HT, McGovern FJ. Renal-cell carcinoma. *N Engl J Med* 2005;353(23):2477-90.
6. Motzer RJ, Bacik J, Murphy BA, et al. Interferon- $\alpha$  as a Comparative Treatment for Clinical Trials of New Therapies Against Advanced Renal Cell Carcinoma. *Journal of Clinical Oncology* 2002;20(1):289-96.
7. Motzer RJ, Hutson TE, Tomczak P, et al. Sunitinib versus interferon  $\alpha$  in metastatic renal-cell carcinoma. *N Engl J Med* 2007;356(2):115-24.
8. Escudier B, Eisen T, Stadler WM, et al. Sorafenib in advanced clear-cell renal-cell carcinoma. *N Engl J Med* 2007;356(2):125-34.
9. Rini BI, Halabi S, Rosenberg JE, et al. Bevacizumab plus interferon  $\alpha$  compared with interferon  $\alpha$  monotherapy in patients with metastatic renal cell carcinoma: CALGB 90206. *J Clin Oncol* 2008;26(33):5422-8.
10. Negrier S, Jager E, Porta C, et al. Efficacy and safety of sorafenib in patients with advanced renal cell carcinoma with and without prior cytokine therapy, a subanalysis of TARGET. *Med Oncol* 2010;27(3):899-906.
11. Sternberg CN, Davis ID, Mardiak J, et al. Pazopanib in locally advanced or metastatic renal cell carcinoma: results of a randomized phase III trial. *J Clin Oncol* 2010;28(6):1061-8.
12. Hutson TE, Lesovoy V, Al-Shukri S, et al. Axitinib versus sorafenib as first-line therapy in patients with metastatic renal-cell carcinoma: a randomised open-label phase 3 trial. *Lancet Oncol* 2013;14(13):1287-94.
13. Motzer RJ, Hutson TE, Cella D, et al. Pazopanib versus sunitinib in metastatic renal-cell carcinoma. *N Engl J Med* 2013;369(8):722-31.
14. Escudier B, Szczylik C, Hutson TE, et al. Randomized phase II trial of first-line treatment with sorafenib versus interferon  $\alpha$  in patients with metastatic renal cell carcinoma. *J Clin Oncol* 2009;27(8):1280-9.

15. Choueiri TK, Halabi S, Sanford BL, et al. Cabozantinib Versus Sunitinib As Initial Targeted Therapy for Patients With Metastatic Renal Cell Carcinoma of Poor or Intermediate Risk: The Alliance A031203 CABOSUN Trial. *Journal of Clinical Oncology* 2017;35(6):591-97.
16. Motzer RJ, Tannir NM, McDermott DF, et al. Nivolumab plus Ipilimumab versus Sunitinib in Advanced Renal-Cell Carcinoma. *N Engl J Med* 2018;378(14):1277-90.
17. Jonasch E, Corn P, Pagliaro LC, et al. Upfront, randomized, phase 2 trial of sorafenib versus sorafenib and low-dose interferon alfa in patients with advanced renal cell carcinoma: clinical and biomarker analysis. *Cancer* 2010;116(1):57-65.
18. Negrier S, Gravis G, Perol D, et al. Temsirolimus and bevacizumab, or sunitinib, or interferon alfa and bevacizumab for patients with advanced renal cell carcinoma (TORAVA): a randomised phase 2 trial. *Lancet Oncol* 2011;12(7):673-80.
19. Procopio G, Verzoni E, Bracarda S, et al. Sorafenib with interleukin-2 vs sorafenib alone in metastatic renal cell carcinoma: the ROSORC trial. *Br J Cancer* 2011;104(8):1256-61.
20. Ravaud A, Barrios CH, Alekseev B, et al. RECORD-2: phase II randomized study of everolimus and bevacizumab versus interferon alpha-2a and bevacizumab as first-line therapy in patients with metastatic renal cell carcinoma. *Ann Oncol* 2015;26(7):1378-84.
21. Caldwell DM, Ades AE, Higgins JP. Simultaneous comparison of multiple treatments: combining direct and indirect evidence. *BMJ* 2005;331(7521):897-900.
22. Lu G, Ades AE. Combination of direct and indirect evidence in mixed treatment comparisons. *Stat Med* 2004;23(20):3105-24.
23. Liberati A, Altman DG, Tetzlaff J, et al. The PRISMA statement for reporting systematic reviews and meta-analyses of studies that evaluate health care interventions: explanation and elaboration. *Annals of internal medicine* 2009;151(4):W65-94
24. Higgins JPT, Altman DG, Gotzsche PC, et al. The Cochrane Collaboration's tool for assessing risk of bias in randomised trials. *BMJ* 2011;343.
25. Tierney JF, Stewart LA, Ghersi D, et al. Practical methods for incorporating summary time-to-event data into meta-analysis. *Trials* 2007;8:16.
26. Dias S, Welton NJ, Sutton AJ, et al. A Generalised Linear Modelling Framework for Pairwise and Network Meta-Analysis of Randomised Controlled Trials. *Medical Decision Making* 2014.
27. Spiegelhalter DJ, Best NG, Carlin BP, et al. Bayesian measures of model complexity and fit. *Journal of The Royal Statistical Society Series B-statistical Methodology* 2002;64(4):583-639.
28. Gelman A, Rubin DB. Markov chain Monte Carlo methods in biostatistics. *Stat Methods Med Res* 1996;5(4):339-55.
29. Powles T, Albiges L, Staehler M, et al. Updated European Association of Urology Guidelines Recommendations for the Treatment of First-line Metastatic Clear Cell Renal Cancer. *Eur Urol* 2017;73(3):311-15.
30. Dias S, Welton NJ, Sutton AJ, et al. Evidence synthesis for decision making 4: inconsistency in networks of evidence based on randomized controlled trials. *Med Decis Making* 2013;33(5):641-56.

- 1  
2  
3 31. Chaimani A, Higgins JP, Mavridis D, et al. Graphical tools for network meta-analysis in  
4 STATA. *PLoS One* 2013;8(10):e76654.
- 5  
6 32. Salanti G, Ades AE, Ioannidis JP. Graphical methods and numerical summaries for presenting  
7 results from multiple-treatment meta-analysis: an overview and tutorial. *J Clin Epidemiol*  
8 2011;64(2):163-71.
- 9  
10 33. Escudier B, Bellmunt J, Negrier S, et al. Phase III trial of bevacizumab plus interferon alfa-2a  
11 in patients with metastatic renal cell carcinoma (AVOREN): final analysis of overall survival. *J*  
12 *Clin Oncol* 2010;28(13):2144-50.
- 13  
14 34. Rini BI, Halabi S, Rosenberg JE, et al. Phase III trial of bevacizumab plus interferon alfa  
15 versus interferon alfa monotherapy in patients with metastatic renal cell carcinoma: final results  
16 of CALGB 90206. *J Clin Oncol* 2010;28(13):2137-43.
- 17  
18 35. Motzer RJ, Hutson TE, Tomczak P, et al. Overall survival and updated results for sunitinib  
19 compared with interferon alfa in patients with metastatic renal cell carcinoma. *J Clin Oncol*  
20 2009;27(22):3584-90.
- 21  
22 36. Motzer RJ, Nosov D, Eisen T, et al. Tivozanib versus sorafenib as initial targeted therapy for  
23 patients with metastatic renal cell carcinoma: results from a phase III trial. *J Clin Oncol*  
24 2013;31(30):3791-9.
- 25  
26 37. Rini BI, Bellmunt J, Clancy J, et al. Randomized phase III trial of temsirolimus and  
27 bevacizumab versus interferon alfa and bevacizumab in metastatic renal cell carcinoma:  
28 INTORACT trial. *J Clin Oncol* 2014;32(8):752-9.
- 29  
30 38. Motzer RJ, Hutson TE, McCann L, et al. Overall survival in renal-cell carcinoma with  
31 pazopanib versus sunitinib. *N Engl J Med* 2014;370(18):1769-70.
- 32  
33 39. Rini BI, Plimack ER, Stus V, et al. Pembrolizumab plus Axitinib versus Sunitinib for  
34 Advanced Renal-Cell Carcinoma. *N Engl J Med* 2019;380(12):1116-27.
- 35  
36 40. Motzer RJ, Penkov K, Haanen J, et al. Avelumab plus Axitinib versus Sunitinib for Advanced  
37 Renal-Cell Carcinoma. *N Engl J Med* 2019;380(12):1103-15.
- 38  
39 41. Procopio G, Verzoni E, Bracarda S, et al. Overall survival for sorafenib plus interleukin-2  
40 compared with sorafenib alone in metastatic renal cell carcinoma (mRCC): final results of the  
41 ROSORC trial. *Ann Oncol* 2013;24(12):2967-71.
- 42  
43 42. Motzer RJ, Barrios CH, Kim TM, et al. Phase II randomized trial comparing sequential  
44 first-line everolimus and second-line sunitinib versus first-line sunitinib and second-line  
45 everolimus in patients with metastatic renal cell carcinoma. *J Clin Oncol* 2014;32(25):2765-72.
- 46  
47 43. Patard JJ, Rioux-Leclercq N, Fergelot P. Understanding the importance of smart drugs in renal  
48 cell carcinoma. *Eur Urol* 2006;49(4):633-43.
- 49  
50 44. Costa LJ, Drabkin HA. Renal cell carcinoma: new developments in molecular biology and  
51 potential for targeted therapies. *Oncologist* 2007;12(12):1404-15.
- 52  
53 45. Mendel DB, Laird AD, Xin X, et al. In vivo antitumor activity of SU11248, a novel tyrosine  
54 kinase inhibitor targeting vascular endothelial growth factor and platelet-derived growth factor  
55 receptors: determination of a pharmacokinetic/pharmacodynamic relationship. *Clin Cancer Res*  
56  
57  
58  
59  
60

- 2003;9(1):327-37.
46. Benjamin LE, Hemo I, Keshet E. A plasticity window for blood vessel remodelling is defined by pericyte coverage of the preformed endothelial network and is regulated by PDGF-B and VEGF. *Development* 1998;125(9):1591-8.
47. Gee MS, Procopio WN, Makonnen S, et al. Tumor vessel development and maturation impose limits on the effectiveness of anti-vascular therapy. *Am J Pathol* 2003;162(1):183-93.
48. Creighton CJ, Morgan M, Gunaratne PH, et al. Comprehensive molecular characterization of clear cell renal cell carcinoma. *Nature* 2013;499(7456):43-49.
49. Loewith R, Jacinto E, Wullschleger S, et al. Two TOR complexes, only one of which is rapamycin sensitive, have distinct roles in cell growth control. *Mol Cell* 2002;10(3):457-68.
50. Inoki K, Guan KL. Complexity of the TOR signaling network. *Trends Cell Biol* 2006;16(4):206-12.
51. Ribas A. Tumor immunotherapy directed at PD-1. *N Engl J Med* 2012;366(26):2517-9.
52. Hammers HJ, Plimack ER, Infante JR, et al. Safety and Efficacy of Nivolumab in Combination With Ipilimumab in Metastatic Renal Cell Carcinoma: The CheckMate 016 Study. *J Clin Oncol* 2017;35(34):3851-58.
53. Antonia SJ, Lopez-Martin JA, Bendell J, et al. Nivolumab alone and nivolumab plus ipilimumab in recurrent small-cell lung cancer (CheckMate 032): a multicentre, open-label, phase 1/2 trial. *Lancet Oncol* 2016;17(7):883-95.
54. McDermott DF, Lee J-L, Szczylik C, et al. Pembrolizumab monotherapy as first-line therapy in advanced clear cell renal cell carcinoma (accRCC): Results from cohort A of KEYNOTE-427. *Journal of Clinical Oncology* 2018;36(15\_suppl):4500-00.
55. Atkins MB, Plimack ER, Puzanov I, et al. Axitinib in combination with pembrolizumab in patients with advanced renal cell cancer: a non-randomised, open-label, dose-finding, and dose-expansion phase 1b trial. *Lancet Oncol* 2018;19(3):405-15.
56. Shrimali RK, Yu Z, Theoret MR, et al. Antiangiogenic agents can increase lymphocyte infiltration into tumor and enhance the effectiveness of adoptive immunotherapy of cancer. *Cancer Res* 2010;70(15):6171-80.
57. Huang Y, Yuan J, Righi E, et al. Vascular normalizing doses of antiangiogenic treatment reprogram the immunosuppressive tumor microenvironment and enhance immunotherapy. *Proceedings of the National Academy of Sciences of the United States of America* 2012;109(43):17561-6.
58. Yasuda S, Sho M, Yamato I, et al. Simultaneous blockade of programmed death 1 and vascular endothelial growth factor receptor 2 (VEGFR2) induces synergistic anti-tumour effect in vivo. *Clinical and experimental immunology* 2013;172(3):500-6.
59. Rini BI, Powles T, Atkins MB, et al. Atezolizumab plus bevacizumab versus sunitinib in patients with previously untreated metastatic renal cell carcinoma (IMmotion151): a multicentre, open-label, phase 3, randomised controlled trial. *Lancet* 2019;393(10189):2404-15.
60. Wallis CJD, Klaassen Z, Bhindi B, et al. First-line Systemic Therapy for Metastatic Renal Cell

- 1  
2  
3 Carcinoma: A Systematic Review and Network Meta-analysis. Eur Urol 2018;74(3):309-21.  
4  
5 61. Wang J, Li X, Wu X, et al. Role of immune checkpoint inhibitor-based therapies for metastatic  
6 renal cell carcinoma in the first-line setting: A Bayesian network analysis. EBioMedicine  
7 2019;47:78-88.  
8  
9 62. Hahn AW, Klaassen Z, Agarwal N, et al. First-line Treatment of Metastatic Renal Cell  
10 Carcinoma: A Systematic Review and Network Meta-analysis. European urology oncology  
11 2019;2(6):708-15.  
12  
13 63. Karner C, Kew K, Wakefield V, et al. Targeted therapies for previously treated advanced or  
14 metastatic renal cell carcinoma: systematic review and network meta-analysis. BMJ Open  
15 2019;9(3):e024691.  
16  
17  
18  
19  
20  
21  
22  
23  
24  
25  
26  
27  
28  
29  
30  
31  
32  
33  
34  
35  
36  
37  
38  
39  
40  
41  
42  
43  
44  
45  
46  
47  
48  
49  
50  
51  
52  
53  
54  
55  
56  
57  
58  
59  
60

Table: Studies included in the multiple-treatments meta-analysis

| Study                             | Number of patients  | Age (years) median(range) | Sex (% male) | MSKCC (%) |              |      | Median PFS in months (95% CI) | Hazard ratio (95% CI)  |
|-----------------------------------|---------------------|---------------------------|--------------|-----------|--------------|------|-------------------------------|------------------------|
|                                   |                     |                           |              | Favorable | Intermediate | Poor |                               |                        |
| <b>Motzer 2014 (RECORD-3)</b>     |                     |                           |              |           |              |      |                               |                        |
| Everolimus                        | 238                 | 62 (20-89)                | 69.7         | 29        | 56           | 15   | 7.9                           | 1.4 (1.2-1.8)          |
| Sunitinib                         | 238                 | 62 (29-84)                | 73.9         | 30        | 56           | 14   | 10.7                          | 1 (Ref)                |
| <b>Motzer 2014 (COMPARZ)</b>      |                     |                           |              |           |              |      |                               |                        |
| Pazopanib                         | 557                 | 61 (18-88)                | 71           | 27        | 58           | 12   | 8.4 (8.3-10.9)                | 1.05 (0.90-1.22)       |
| Sunitinib                         | 553                 | 62 (23-86)                | 75           | 27        | 59           | 9    | 9.5 (8.3-11.1)                | 1 (Ref)                |
| <b>Rini 2014 (INTORACT)</b>       |                     |                           |              |           |              |      |                               |                        |
| Temsirolimus plus bevacizumab     | 400                 | 59 (22-87)                | 72           | 28        | 65           | 8    | 9.1 (8.1-10.2)                | 1.1 (0.9-1.3)          |
| Bevacizumab plus IFN- $\alpha$    | 391                 | 58 (23-81)                | 69           | 27        | 65           | 8    | 9.3 (9.0-11.2)                | 1 (Ref)                |
| <b>Piccipio 2013 (ROSORC)</b>     |                     |                           |              |           |              |      |                               |                        |
| Sorafenib plus interleukin-2      | 66                  | 64 (57-69) *              | 79           | 55        | 41           | 5    | NA                            | NA                     |
| Sorafenib                         | 62                  | 62 (52-69) *              | 69           | 55        | 39           | 6    | NA                            | NA                     |
| <b>Hanson 2013</b>                |                     |                           |              |           |              |      |                               |                        |
| Axitinib                          | 192                 | 58 (23-83)                | 70           | 49        | 44           | 4    | 10.1 (7.2-12.1)]              | 0.77 (0.56-1.05)       |
| Sorafenib                         | 96                  | 58 (20-77)                | 77           | 55        | 42           | 2    | 6.5 (4.7-8.3)                 | 1 (Ref)                |
| <b>Motzer 2013</b>                |                     |                           |              |           |              |      |                               |                        |
| Tivozanib                         | 260;                | 59 (23-83)                | 71           | 27        | 67           | 7    | 12.7 (9.1-15.0)               | 0.756<br>(0.580-0.985) |
|                                   | treatment-naive 181 |                           |              |           |              |      |                               |                        |
| Sorafenib                         | 257;                | 59 (23-85)                | 74           | 34        | 62           | 4    | 9.1 (7.3-10.8)                | 1 (Ref)                |
|                                   | treatment naive 181 |                           |              |           |              |      |                               |                        |
| <b>Sternberg 2010 (VEG105192)</b> |                     |                           |              |           |              |      |                               |                        |
| Pazopanib                         | 290;                | 59 (28-82)                | 68           | 36        | 56           | 4    | 11.1                          | 0.40 (0.27-0.60)       |
|                                   | treatment naive 155 |                           |              |           |              |      |                               |                        |
| Placebo                           | n = 145;            | 62 (25-81)                | 74           | 40        | 51           | 6    | 2.8                           | 1 (Ref)                |
|                                   | treatment naive 78  |                           |              |           |              |      |                               |                        |
| <b>Motzer 2009</b>                |                     |                           |              |           |              |      |                               |                        |
| Sunitinib                         | 375                 | 62 (27-87)                | 71           | 38        | 56           | 6    | 11 (11-13)                    | 0.539<br>(0.451-0.643) |
| IFN- $\alpha$                     | 375                 | 59 (34-85)                | 72           | 34        | 59           | 7    | 5 (4-6)                       | 1 (Ref)                |
| <b>Ngqirier 2010 (TARGET)</b>     |                     |                           |              |           |              |      |                               |                        |
| Sorafenib                         | 451;                | 60                        | 63.6         | 53.2      | 46.8         | 0    | 5.8                           | 0.48 (0.32-0.73)       |
|                                   | treatment-naive 77  |                           |              |           |              |      |                               |                        |
| Placebo                           | 452;                | 60.5                      | 69           | 45.2      | 54.8         | 0    | 2.8                           | 1 (Ref)                |
|                                   | treatment-naive 84  |                           |              |           |              |      |                               |                        |
| <b>Rini 2010 (CALGB 90206)</b>    |                     |                           |              |           |              |      |                               |                        |

|    |                                        |     |            |      |                   |                   |                   |                   |                              |  |
|----|----------------------------------------|-----|------------|------|-------------------|-------------------|-------------------|-------------------|------------------------------|--|
| 1  |                                        |     |            |      |                   |                   |                   |                   |                              |  |
| 2  |                                        |     |            |      |                   |                   |                   |                   |                              |  |
| 3  |                                        |     |            |      |                   |                   |                   |                   |                              |  |
| 4  | Bevacizumab plus IFN- $\alpha$         | 369 | 61 (56-70) | 73   | 26                | 64                | 10                | 8.5 (7.5-9.7)     | 0.71 ( 0.61-0.83)            |  |
| 5  | IFN- $\alpha$                          | 363 | 62 (55-70) | 66   | 26                | 64                | 10                | 5.2 (3.1-5.6)     | 1 (Ref)                      |  |
| 6  | <b>Escudier 2010 (AVOREN )</b>         |     |            |      |                   |                   |                   |                   |                              |  |
| 7  | Bevacizumab plus IFN- $\alpha$         | 327 | 61 (30-82) | 68   | 27                | 56                | 9                 | 10.2              | 0.61 (0.51-0.73)             |  |
| 8  | IFN- $\alpha$                          | 322 | 60 (18-81) | 73   | 29                | 56                | 8                 | 5.4               | 1 (Ref)                      |  |
| 9  |                                        |     |            |      |                   |                   |                   |                   |                              |  |
| 10 |                                        |     |            |      |                   |                   |                   |                   | Continued                    |  |
| 11 | <b>Molzer 2018 (CheckMate 214)</b>     |     |            |      |                   |                   |                   |                   |                              |  |
| 12 | Nivolumab plus Ipilimumab              | 550 | 62 (26-85) | 75   | 23                | 61                | 17                | 11.6 (8.7-15.5)   | 0.82(0.64-1.05) <sup>†</sup> |  |
| 13 | Sunitinib                              | 546 | 62 (21-85) | 72   | 23                | 61                | 16                | 8.4 (7.0-10.8)    | 1 (Ref)                      |  |
| 14 | <b>Choueiri 2017</b>                   |     |            |      |                   |                   |                   |                   |                              |  |
| 15 |                                        |     |            |      |                   |                   |                   |                   |                              |  |
| 16 | Cabozantinib                           | 79  | 63 (40-82) | 83.5 | 0                 | 81.0 <sup>§</sup> | 19.0 <sup>§</sup> | 8.2 ( 6.2 to 8.8) | 0.66 (0.46-0.95)             |  |
| 17 | Sunitinib                              | 78  | 64(31-87)  | 73.1 | 0                 | 80.8 <sup>§</sup> | 19.2 <sup>§</sup> | 5.6 (3.4 to 8.1)  | 1 (Ref)                      |  |
| 18 |                                        |     |            |      |                   |                   |                   |                   |                              |  |
| 19 | <b>Molzer 2019 (JAVELIN Renal 101)</b> |     |            |      |                   |                   |                   |                   |                              |  |
| 20 | Avelumab plus Axitinib                 | 442 | 62 (29-83) | 71.5 | 21.7              | 64.0              | 11.5              | 13.8 (11.1-NE)    | 0.69 (0.56-0.84)             |  |
| 21 | Sunitinib                              | 444 | 61 (27-88) | 77.5 | 22.5              | 66.0              | 10.1              | 8.4 (6.9-11.1)    | 1 (Ref)                      |  |
| 22 |                                        |     |            |      |                   |                   |                   |                   |                              |  |
| 23 | <b>Ronzi 2019 (KEYNOTE-426)</b>        |     |            |      |                   |                   |                   |                   |                              |  |
| 24 | Pembrolizumab and Axitinib             | 432 | 62 (30-89) | 71.3 | 31.9 <sup>§</sup> | 55.1 <sup>§</sup> | 13 <sup>§</sup>   | 15.1 (12.6-17.7)  | 0.69 (0.57-0.84)             |  |
| 25 | Sunitinib                              | 429 | 61 (26-90) | 74.6 | 30.5 <sup>§</sup> | 57.3 <sup>§</sup> | 12.1 <sup>§</sup> | 11.1 (8.7-12.5)   | 1 (Ref)                      |  |
| 26 |                                        |     |            |      |                   |                   |                   |                   |                              |  |

IFN- $\alpha$  = interferon- $\alpha$ ; MSKCC = Memorial Sloan Kettering Cancer Center; PFS = progression-free survival; CI = confidence interval; AE = adverse event; N/A = not available; Ref = reference group (hence hazard ratio set to 1);

\* Interquartile range; <sup>†</sup> mean; <sup>‡</sup> 99.1% CI; <sup>§</sup> IMDC risk group, International Metastatic Renal Cell Carcinoma Database Consortium

**Legends for Figures**

**Fig. 1 - Literature search and selection**

**Fig. 2 - Analysis of progression-free survival for patients with favorable-risk disease.**

(A) network diagram: the size of every treatment node corresponds to the number of randomly assigned patients. The width of the lines is proportional to the number of trials. (B) forest plot, with sunitinib as the comparator; (C) Ranking of treatments. Rankograms were drawn according to distribution of the ranking probabilities. Ranking indicates the probability to be the best treatment, the second best, the third best, and so on in terms of PFS, among the 13 treatments. HR = hazard ratio. CI = confidence interval. Numbers in parentheses indicate 95% credible intervals. SUN = sunitinib. PLA = placebo. IFN = interferon- $\alpha$ . SOR = sorafenib. PAZ = pazopanib. AXI =

axitinib. EVE = everolimus. TIV = tivozanib. BEV\_IFN = bevacizumab plus interferon- $\alpha$ .

TEM\_BEV = temsirolimus plus bevacizumab. NIV\_IPI = nivolumab plus ipilimumab.

PEM\_AXI= pembrolizumab plus axitinib. AVE\_AXI= avelumab plus axitinib.

**Fig. 3 - Analysis of progression-free survival for patients with intermediate-risk disease.** (A) network diagram. (B) forest plot, with sunitinib as the comparator; (C) Ranking of treatments. HR = hazard ratio. CI = confidence interval. Numbers in parentheses indicate 95% credible intervals. SUN = sunitinib. PLA = placebo. IFN = interferon- $\alpha$ . SOR = sorafenib. PAZ = pazopanib. AXI = axitinib. EVE = everolimus. TIV = tivozanib. CAB = cabozantinib. BEV\_IFN = bevacizumab plus interferon- $\alpha$ . TEM\_BEV = temsirolimus plus bevacizumab. NIV\_IPI = nivolumab plus ipilimumab. PEM\_AXI= pembrolizumab plus axitinib. AVE\_AXI= avelumab plus axitinib.

**Fig. 4 - Analysis of progression-free survival for patients with poor-risk disease.** (A) network diagram. (B) forest plot, with sunitinib as the comparator; (C) Ranking of treatments. HR = hazard ratio. CI = confidence interval. Numbers in parentheses indicate 95% credible intervals. SUN = sunitinib. IFN = interferon- $\alpha$ . EVE = everolimus. CAB = cabozantinib. BEV\_IFN = bevacizumab plus interferon- $\alpha$ . TEM\_BEV = temsirolimus plus bevacizumab. NIV\_IPI = nivolumab plus ipilimumab. PEM\_AXI= pembrolizumab plus axitinib. AVE\_AXI= avelumab plus axitinib.

**Fig.5- Analysis of overall survival for patients with favorable- risk (A), intermediate- risk (B), and poor-risk (C).** HR = hazard ratio. CI = confidence interval. Numbers in parentheses indicate 95% credible intervals. SUN = sunitinib. PAZ = pazopanib. NIV\_IPI = nivolumab plus ipilimumab. PEM\_AXI= pembrolizumab plus axitinib.

**Fig. 6 - Pooled odds ratios for high-grade adverse events.**



1  
2  
3  
4 The column treatment is compared with the row treatment. Odds ratios lower than 1  
5 favor the column-defining treatment. Numbers in parentheses indicate 95% credible  
6 intervals. SUN = sunitinib. PLA = placebo. SOR = sorafenib. PAZ = pazopanib. TIV  
7 = tivozanib. CAB = cabozantinib. SOR\_IL-2= sorafenib plus interleukin-2. NIV\_IPI  
8 = nivolumab plus ipilimumab. PEM\_AXI= pembrolizumab plus axitinib. AVE\_AXI=  
9 avelumab plus axitinib. Stepwise comparison of treatments did not find significant  
10 differences in rates of high-grade adverse events.  
11  
12  
13  
14  
15  
16  
17

18  
19 **Fig. 7 - Funnel plot of randomized controlled trials included in the meta-analysis**  
20 **for hazard ratios of progression-free survival**  
21

22 SUN = sunitinib. PLA = placebo. IFN = interferon- $\alpha$ . SOR = sorafenib. PAZ =  
23 pazopanib. AXI = axitinib. EVE = everolimus. TIV = tivozanib. BEV\_IFN =  
24 bevacizumab plus interferon- $\alpha$ . TEM\_BEV = temsirolimus plus bevacizumab.  
25 NIV\_IPI = nivolumab plus ipilimumab. PEM\_AXI= pembrolizumab plus axitinib.  
26 AVE\_AXI= avelumab plus axitinib.  
27  
28  
29  
30  
31  
32  
33  
34  
35  
36  
37  
38  
39  
40  
41  
42  
43  
44  
45  
46  
47  
48  
49  
50  
51  
52  
53  
54  
55  
56  
57  
58  
59  
60

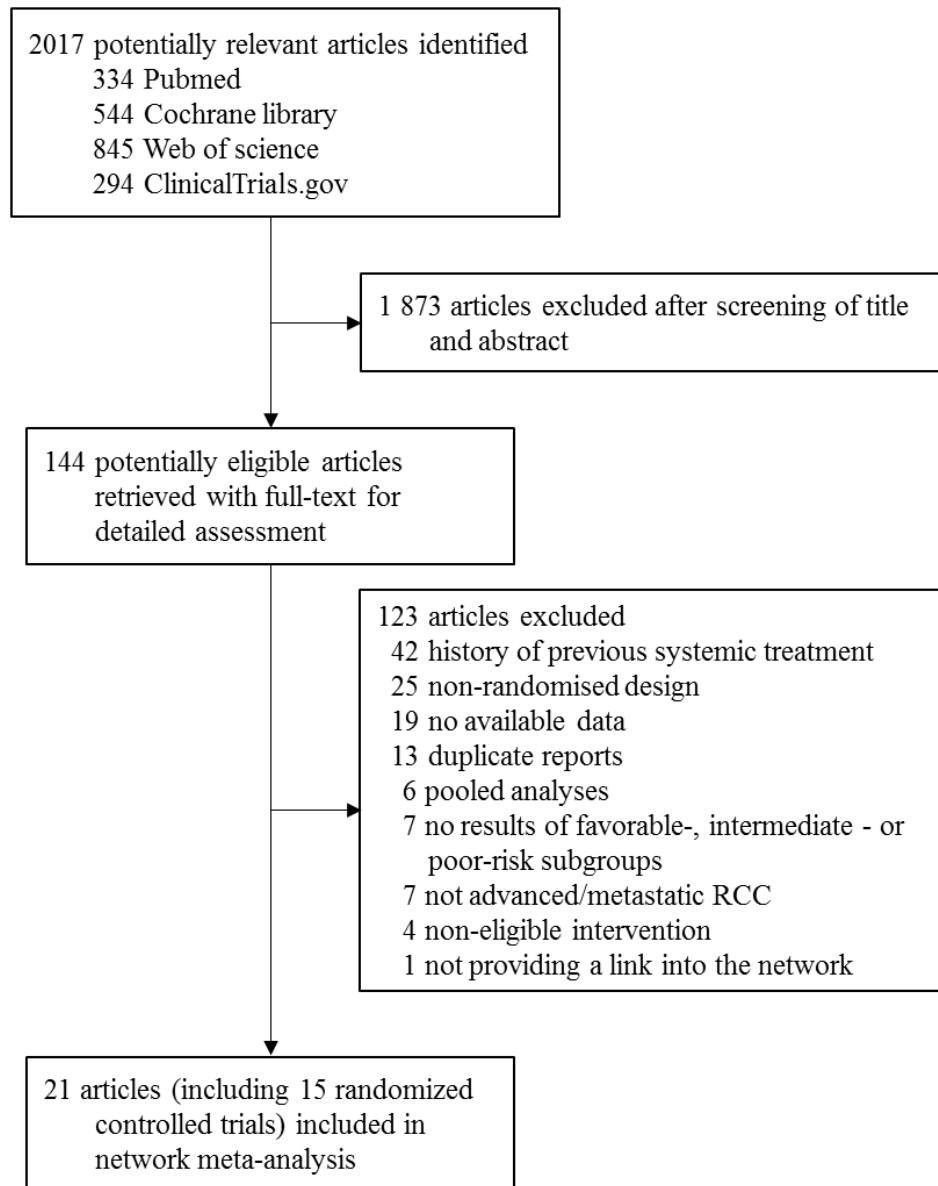

Fig. 1 - Literature search and selection

140x174mm (150 x 150 DPI)



Fig. 2 - Analysis of progression-free survival for patients with favorable-risk disease. (A) network diagram: the size of every treatment node corresponds to the number of randomly assigned patients. The width of the lines is proportional to the number of trials. (B) forest plot, with sunitinib as the comparator; (C) Ranking of treatments. Rankograms were drawn according to distribution of the ranking probabilities. Ranking indicates the probability to be the best treatment, the second best, the third best, and so on in terms of PFS, among the 13 treatments. HR = hazard ratio. CI = confidence interval. Numbers in parentheses indicate 95% credible intervals. SUN = sunitinib. PLA = placebo. IFN = interferon- $\alpha$ . SOR = sorafenib. PAZ = pazopanib. AXI = axitinib. EVE = everolimus. TIV = tivozanib. BEV\_IFN = bevacizumab plus interferon- $\alpha$ . TEM\_BEV = temsirolimus plus bevacizumab. NIV\_IPI = nivolumab plus ipilimumab. PEM\_AXI= pembrolizumab plus axitinib. AVE\_AXI= avelumab plus axitinib.

220x347mm (150 x 150 DPI)

1  
2  
3  
4  
5  
6  
7  
8  
9  
10  
11  
12  
13  
14  
15  
16  
17  
18  
19  
20  
21  
22  
23  
24  
25  
26  
27  
28  
29  
30  
31  
32  
33  
34  
35  
36  
37  
38  
39  
40  
41  
42  
43  
44  
45  
46  
47  
48  
49  
50  
51  
52  
53  
54  
55  
56  
57  
58  
59  
60



Fig. 3 - Analysis of progression-free survival for patients with intermediate-risk disease. (A) network diagram. (B) forest plot, with sunitinib as the comparator; (C) Ranking of treatments. HR = hazard ratio. CI = confidence interval. Numbers in parentheses indicate 95% credible intervals. SUN = sunitinib. PLA = placebo. IFN = interferon- $\alpha$ . SOR = sorafenib. PAZ = pazopanib. AXI = axitinib. EVE = everolimus. TIV = tivozanib. CAB = cabozantinib. BEV\_IFN = bevacizumab plus interferon- $\alpha$ . TEM\_BEV = temsirolimus plus bevacizumab. NIV\_IPI = nivolumab plus ipilimumab. PEM\_AXI= pembrolizumab plus axitinib. AVE\_AXI= avelumab plus axitinib.

235x369mm (150 x 150 DPI)



Fig. 4 - Analysis of progression-free survival for patients with poor-risk disease. (A) network diagram. (B) forest plot, with sunitinib as the comparator; (C) Ranking of treatments. HR = hazard ratio. CI = confidence interval. Numbers in parentheses indicate 95% credible intervals. SUN = sunitinib. IFN = interferon- $\alpha$ . EVE = everolimus. CAB = cabozantinib. BEV\_IFN = bevacizumab plus interferon- $\alpha$ . TEM\_BEV = temsirolimus plus bevacizumab. NIV\_IPI = nivolumab plus ipilimumab. PEM\_AXI = pembrolizumab plus axitinib. AVE\_AXI = avelumab plus axitinib.

221x322mm (150 x 150 DPI)

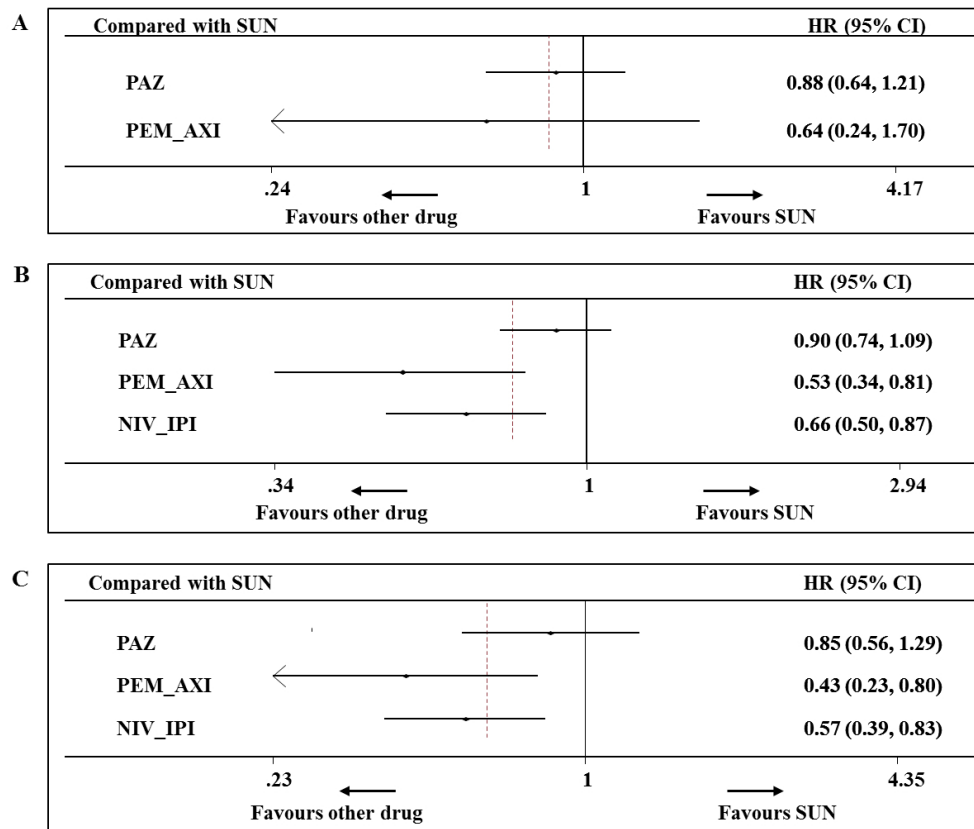

Fig.5- Analysis of overall survival for patients with favorable- risk (A), intermediate- risk (B), and poor-risk (C). HR = hazard ratio. CI = confidence interval. Numbers in parentheses indicate 95% credible intervals. SUN = sunitinib. PAZ = pazopanib. NIV\_IPI = nivolumab plus ipilimumab. PEM\_AXI= pembrolizumab plus axitinib.

205x173mm (150 x 150 DPI)

|          |                      |                        |                       |                        |                       |                         |                       |                        |                        |
|----------|----------------------|------------------------|-----------------------|------------------------|-----------------------|-------------------------|-----------------------|------------------------|------------------------|
| SUN      | 0.40<br>(0.02, 8.55) | 2.83<br>(0.06, 150.75) | 1.07<br>(0.12, 9.19)  | 1.98<br>(0.02, 201.54) | 0.92<br>(0.09, 8.13)  | 5.29<br>(0.06, 499.51)  | 0.49<br>(0.05, 4.26)  | 1.30<br>(0.15, 12.14)  | 1.00<br>(0.11, 8.77)   |
| PLA      |                      | 7.16<br>(0.63, 94.46)  | 2.67<br>(0.31, 24.54) | 4.95<br>(0.20, 156.27) | 2.30<br>(0.05, 99.17) | 12.98<br>(0.45, 392.76) | 1.24<br>(0.03, 52.88) | 3.33<br>(0.08, 135.00) | 2.48<br>(0.06, 109.18) |
| SOR      |                      |                        | 0.38<br>(0.01, 9.58)  | 0.69<br>(0.08, 6.50)   | 0.32<br>(0.00, 30.01) | 1.82<br>(0.18, 16.55)   | 0.17<br>(0.00, 13.75) | 0.46<br>(0.00, 39.97)  | 0.36<br>(0.00, 30.63)  |
| PAZ      |                      |                        |                       | 1.84<br>(0.04, 110.86) | 0.87<br>(0.03, 19.18) | 4.87<br>(0.09, 278.21)  | 0.46<br>(0.02, 10.04) | 1.22<br>(0.06, 25.58)  | 0.92<br>(0.04, 19.41)  |
| TIV      |                      |                        |                       |                        | 0.46<br>(0.00, 67.33) | 2.63<br>(0.11, 53.00)   | 0.25<br>(0.00, 33.35) | 0.66<br>(0.00, 91.27)  | 0.51<br>(0.00, 67.33)  |
| CAB      |                      |                        |                       |                        |                       | 5.80<br>(0.03, 947.65)  | 0.53<br>(0.02, 13.17) | 1.42<br>(0.06, 33.89)  | 1.08<br>(0.05, 25.63)  |
| SOR_IL-2 |                      |                        |                       |                        |                       |                         | 0.09<br>(0.00, 13.57) | 0.25<br>(0.00, 40.53)  | 0.19<br>(0.00, 28.00)  |
| NIV_IPI  |                      |                        |                       |                        |                       |                         |                       | 2.65<br>(0.13, 58.75)  | 2.04<br>(0.09, 44.95)  |
| PEM_AXI  |                      |                        |                       |                        |                       |                         |                       |                        | 0.76<br>(0.03, 16.68)  |
| AVE_AXI  |                      |                        |                       |                        |                       |                         |                       |                        |                        |

Fig. 6 - Pooled odds ratios for high-grade adverse events.

The column treatment is compared with the row treatment. Odds ratios lower than 1 favor the column-defining treatment. Numbers in parentheses indicate 95% credible intervals. SUN = sunitinib. PLA = placebo. SOR = sorafenib. PAZ = pazopanib. TIV = tivozanib. CAB = cabozantinib. SOR\_IL-2= sorafenib plus interleukin-2. NIV\_IPI = nivolumab plus ipilimumab. PEM\_AXI= pembrolizumab plus axitinib. AVE\_AXI= avelumab plus axitinib. Stepwise comparison of treatments did not find significant differences in rates of high-grade adverse events.

256x138mm (150 x 150 DPI)



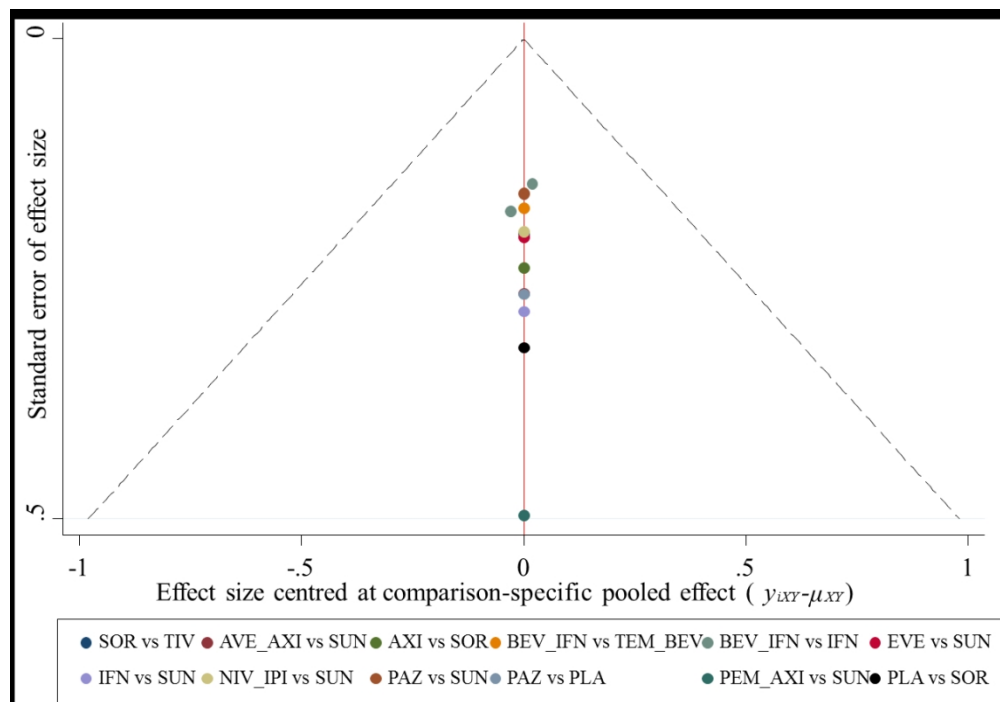

Fig. 7 - Funnel plot of randomized controlled trials included in the meta-analysis for hazard ratios of progression-free survival  
 SUN = sunitinib. PLA = placebo. IFN = interferon- $\alpha$ . SOR = sorafenib. PAZ = pazopanib. AXI = axitinib. EVE = everolimus. TIV = tivozanib. BEV\_IFN = bevacizumab plus interferon- $\alpha$ . TEM\_BEV = temsirolimus plus bevacizumab. NIV\_IPI = nivolumab plus ipilimumab. PEM\_AXI= pembrolizumab plus axitinib. AVE\_AXI= avelumab plus axitinib.

215x150mm (150 x 150 DPI)

## Appendix

### Search strategy

#### Pubmed:

((((((((((((sorafenib[Title/Abstract]) OR sunitinib[Title/Abstract]) OR bevacizumab[Title/Abstract]) OR pazopanib[Title/Abstract]) OR temsirolimus[Title/Abstract]) OR everolimus[Title/Abstract]) OR axitinib[Title/Abstract]) OR Cabozantinib[Title/Abstract]) OR IFN-alpha[Title/Abstract]) OR IL-2[Title/Abstract]) OR Nivolumab[Title/Abstract]) OR Immune checkpoint blockade[Title/Abstract])) AND (("Carcinoma, Renal Cell"[Mesh]) OR (((renal cancer[Title]) OR renal carcinoma[Title]) OR kidney cancer[Title]) OR kidney carcinoma[Title]))  
Filter: Controlled Clinical Trial

#### Cochrane Library:

#1 sorafenib:ti,ab,kw or sunitinib:ti,ab,kw or bevacizumab:ti,ab,kw or temsirolimus:ti,ab,kw or pazopanib:ti,ab,kw (Word variations have been searched)  
#2 everolimus:ti,ab,kw or afatinib:ti,ab,kw or cabozantinib:ti,ab,kw or IFN:ti,ab,kw or IL-2:ti,ab,kw (Word variations have been searched)  
#3 nivolumab:ti,ab,kw or Immune checkpoint blockade:ti,ab,kw (Word variations have been searched)  
#4 MeSH descriptor: [Carcinoma, Renal Cell] explode all trees  
#5 #1 or #2 or #3  
#6 #4 and #5, Filter: Trials

#### Web of science

# 1 (((((((((((Topic: (sorafenib) OR Topic: (sunitinib)) OR Topic: (bevacizumab)) OR Topic: (pazopanib)) OR Topic: (temsirolimus)) OR Topic: (everolimus)) OR Topic: (afatinib)) OR Topic: (cabozantinib)) OR Topic: (IFN)) OR Topic: (IL-2)) OR Topic: (nivolumab)) OR Topic: (Immune checkpoint blockade))  
# 2 Title: (renal cell carcinoma) OR Title: (renal cancer) OR Title: (renal carcinoma) OR Title: (kidney cancer) OR Title: (kidney carcinoma)  
# 3 #2 AND #1  
# 4 #2 AND #1 Document Types: CLINICAL TRIAL

1  
2  
3  
4 **ClinicalTrials.gov:**

5 Category: “renal cell carcinoma OR renal cancer OR renal carcinoma OR kidney cancer OR  
6  
7 kidney carcinoma, Studies With Results”

8  
9  
10 (<http://clinicaltrials.gov/>)  
11  
12  
13  
14  
15  
16  
17  
18  
19  
20  
21  
22  
23  
24  
25  
26  
27  
28  
29  
30  
31  
32  
33  
34  
35  
36  
37  
38  
39  
40  
41  
42  
43  
44  
45  
46  
47  
48  
49  
50  
51  
52  
53  
54  
55  
56  
57  
58  
59  
60

For peer review only

**Appendix figure 1 Analysis of overall survival for patients with favorable-risk disease.**

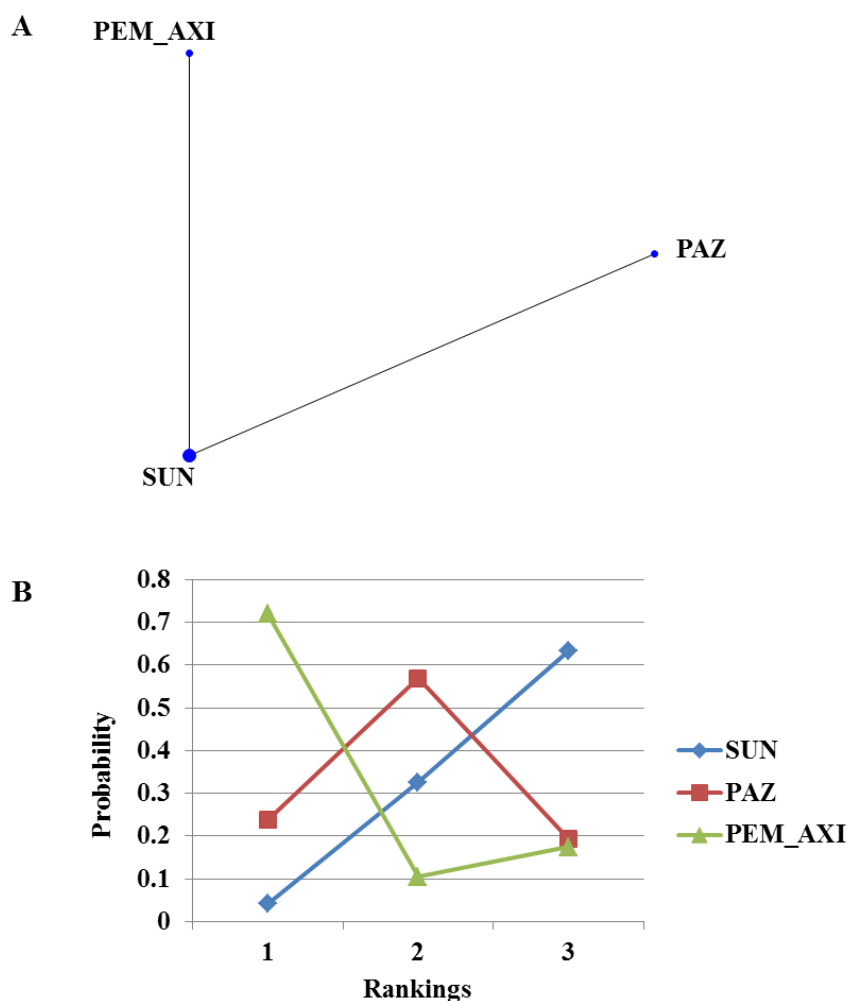

(A) network diagram: the size of every treatment node corresponds to the number of randomly assigned patients. The width of the lines is proportional to the number of trials. (B) Ranking of treatments in terms of overall survival. Rankograms were drawn according to distribution of the ranking probabilities. Ranking indicates the probability to be the best treatment, the second best, the third best, and so on in terms of overall survival, among the three treatments. SUN = sunitinib. PAZ = pazopanib. PEM\_AXI = pembrolizumab plus axitinib.

Appendix figure 2 Analysis of overall survival for patients with intermediate-risk disease.



(A) network diagram: the size of every treatment node corresponds to the number of randomly assigned patients. The width of the lines is proportional to the number of trials. (B) Ranking of treatments in terms of overall survival. Rankograms were drawn according to distribution of the ranking probabilities. Ranking indicates the probability to be the best treatment, the second best, the third best, and so on in terms of overall survival, among the four treatments. SUN = sunitinib. PAZ = pazopanib. NIV\_IPI = nivolumab plus ipilimumab. PEM\_AXI = pembrolizumab plus axitinib.

Appendix figure 3 Analysis of overall survival for patients with poor-risk disease.



(A) network diagram: the size of every treatment node corresponds to the number of randomly assigned patients. The width of the lines is proportional to the number of trials. (B) Ranking of treatments in terms of overall survival. Rankograms were drawn according to distribution of the ranking probabilities. Ranking indicates the probability to be the best treatment, the second best, the third best, and so on in terms of overall survival, among the four treatments. SUN = sunitinib. PAZ = pazopanib. NIV\_IPI = nivolumab plus ipilimumab. PEM\_AXI = pembrolizumab plus axitinib.

**Appendix figure 4:** Pooled odds ratios for **overall adverse events** by Bayesian network meta-analysis

|     |                       |                       |                       |                       |                        |
|-----|-----------------------|-----------------------|-----------------------|-----------------------|------------------------|
| SUN | 2.28<br>(0.27, 23.95) | 1.05<br>(0.03, 45.23) | 0.34<br>(0.08, 1.40)  | 0.38<br>(0.05, 2.41)  | 1.61<br>(0.17, 19.17)  |
|     | PAZ                   | 0.46<br>(0.01, 34.72) | 0.15<br>(0.01, 1.94)  | 0.16<br>(0.01, 2.69)  | 0.68<br>(0.03, 18.38)  |
|     |                       | CAB                   | 0.33<br>(0.01, 14.72) | 0.36<br>(0.00, 18.55) | 1.57<br>(0.02, 115.31) |
|     |                       |                       | NIV_IPI               | 1.12<br>(0.10, 11.68) | 4.77<br>(0.32, 84.86)  |
|     |                       |                       |                       | PEM_AXI               | 4.31<br>(0.22, 98.04)  |
|     |                       |                       |                       |                       | AVE_AXI                |

The column treatment is compared with the row treatment. ORs lower than 1 favor the column-defining treatment. Numbers in parentheses indicate 95% credible intervals. Stepwise comparison of treatments did not find significant differences in rates of overall adverse events. SUN = sunitinib. PAZ = pazopanib. CAB = cabozantinib. NIV\_IPI = nivolumab plus ipilimumab, PEM\_AXI = pembrolizumab and axitinib, AVE\_AXI= avelumab plus axitinib.

**Appendix figure 5** Pooled hazard ratios for progression-free survival by Bayesian network-analysis and traditional meta-analysis



HR = hazard ratio. CI=confidence interval for traditional meta-analysis and credible interval for Bayesian network meta-analysis. SUN = sunitinib. PLA = placebo. IFN = interferon- $\alpha$ . SOR = sorafenib. PAZ = pazopanib. AXI = axitinib. EVE = everolimus. TIV = tivozanib. BEV\_IFN = bevacizumab plus interferon- $\alpha$ . TEM\_BEV = temsirolimus plus bevacizumab. NIV\_IPI = nivolumab plus ipilimumab.



Appendix figure 6 Cochrane risk of bias tool assessment

|                                 | Random sequence generation (selection bias) | Allocation concealment (selection bias) | Blinding of participants and personnel (performance bias) | Blinding of outcome assessment (detection bias) | Incomplete outcome data (attrition bias) | Selective reporting (reporting bias) | Other bias |
|---------------------------------|---------------------------------------------|-----------------------------------------|-----------------------------------------------------------|-------------------------------------------------|------------------------------------------|--------------------------------------|------------|
| Choueiri 2017                   | +                                           | +                                       | -                                                         | +                                               | +                                        | +                                    | ?          |
| Escudier 2010 (AVOREN)          | +                                           | +                                       | +                                                         | +                                               | +                                        | +                                    | ?          |
| Hutson 2013                     | +                                           | +                                       | -                                                         | +                                               | +                                        | +                                    | +          |
| Motzer 2009                     | +                                           | +                                       | -                                                         | ?                                               | +                                        | +                                    | +          |
| Motzer 2013                     | +                                           | +                                       | -                                                         | ?                                               | +                                        | +                                    | ?          |
| Motzer 2014 (COMPARZ)           | +                                           | +                                       | -                                                         | ?                                               | +                                        | +                                    | +          |
| Motzer 2014 (RECORD-3)          | +                                           | ?                                       | -                                                         | ?                                               | +                                        | +                                    | ?          |
| Motzer 2018 (CheckMate 214)     | +                                           | +                                       | ?                                                         | +                                               | +                                        | +                                    | ?          |
| Motzer 2019 (JAVELIN Renal 101) | +                                           | +                                       | -                                                         | +                                               | +                                        | +                                    | +          |
| Negrier 2010 (TARGET)           | +                                           | +                                       | +                                                         | +                                               | +                                        | +                                    | +          |
| Procopio 2013 (ROSORC)          | +                                           | +                                       | -                                                         | -                                               | +                                        | +                                    | ?          |
| Rini 2010 (CALGB 90206)         | +                                           | +                                       | +                                                         | +                                               | +                                        | +                                    | +          |
| Rini 2014 (INTORACT)            | +                                           | +                                       | -                                                         | +                                               | +                                        | +                                    | +          |
| Rini 2019 (KEYNOTE-426)         | +                                           | +                                       | -                                                         | +                                               | +                                        | +                                    | +          |
| Sternberg 2010 (VEG105192)      | +                                           | +                                       | +                                                         | +                                               | +                                        | +                                    | ?          |

**Appendix Table 1:** For advanced/metastatic RCC of favorable-risk, comparison of hazard ratios (95% CI) for **progression-free survival** from fixed and random models.

| Treatment compared with SUN | Fixed Model              | Random Model       |
|-----------------------------|--------------------------|--------------------|
| PLA                         | <b>2.54 (1.37- 4.70)</b> | 2.79 (0.005-4812)  |
| IFN                         | <b>2.69 (1.54-4.67)</b>  | 2.57 (0.05-18.24)  |
| SOR                         | 1.47 (0.61-3.49)         | 1.56 (0.001-2735)  |
| PAZ                         | 1.02 (0.74-1.39)         | 1.03 (0.05-142.4)  |
| AXI                         | 0.93 (0.33-2.54)         | 0.95 (0.001-22200) |
| EVE                         | 1.20 (0.80-1.80)         | 1.28 (0.03-66.05)  |
| BEV_IFN                     | 1.65 (0.90 -2.99)        | 1.54 (0.01-24.08)  |
| TEM_BEV                     | 1.98 (0.98 -3.96)        | 1.92 (0.02-155.90) |
| TIV                         | 0.89 (0.34-2.35)         | 0.96 (0.001-11940) |
| NIV_IPI                     | <b>2.18 (1.47-3.25)</b>  | 2.16 (0.05-52.46)  |
| PEM_AXI                     | 0.64 (0.24-1.69)         | 0.64 (0.01-64.60)  |
| AVE_AXI                     | <b>0.57 (0.34-0.96)</b>  | 0.57 (0.01-33.4)   |
| DIC                         | 9.68                     | 11.19              |

Numbers in parentheses indicate 95% credible intervals. SUN = sunitinib. PLA = placebo. IFN = interferon- $\alpha$ . SOR = sorafenib. PAZ = pazopanib. AXI = axitinib. EVE = everolimus. BEV\_IFN = bevacizumab plus interferon- $\alpha$ . TEM\_BEV = temsirolimus plus bevacizumab. TIV = tivozanib. NIV\_IPI = nivolumab plus ipilimumab, PEM\_AXI = pembrolizumab and axitinib, AVE\_AXI= avelumab plus axitinib. Bold type font indicates significant values.

**Appendix Table 2:** For advanced/metastatic RCC of intermediate-risk, comparison of hazard ratios (95% CI) for **progression-free survival** from fixed and random models.

| Treatment compared with SUN | Fixed Model             | Random Model        |
|-----------------------------|-------------------------|---------------------|
| PLA                         | <b>1.99 (1.29-3.14)</b> | 2.00 (0.01-1366)    |
| IFN                         | <b>2.57 (1.88-3.54)</b> | 2.56 (0.02-283)     |
| SOR                         | 0.95 (0.47-1.91)        | 0.95 (0.002- 5382)  |
| PAZ                         | 0.98 (0.80-1.18)        | 0.98 (0.02- 94.94)  |
| AXI                         | 0.80 (0.36-1.81)        | 0.80 (0.001- 7618)  |
| EVE                         | <b>1.50 (1.11-2.01)</b> | 1.50 (0.02-121.20)  |
| CAB                         | <b>0.63 (0.44-0.97)</b> | 0.65 (0.01- 64.02)  |
| BEV_IFN                     | <b>1.69 (1.18-2.41)</b> | 1.60 (0.01- 895.10) |
| TEM_BEV                     | <b>1.88 (1.22-2.81)</b> | 1.81 (0.002- 4299)  |
| TIV                         | 0.76 (0.36-1.65)        | 0.79 (0.001- 15210) |
| NIV_IPI                     | <b>0.66 (0.53-0.81)</b> | 0.67 (0.01- 64.51)  |
| PEM_AXI                     | <b>0.52 (0.35-0.81)</b> | 0.52 (0.02-10.67)   |
| AVE_AXI                     | <b>0.62 (0.47-0.83)</b> | 0.60 (0.02-10.67)   |
| DIC                         | 1.97                    | 2.92                |

Numbers in parentheses indicate 95% credible intervals. SUN = sunitinib. PLA = placebo. IFN = interferon- $\alpha$ . SOR = sorafenib. PAZ = pazopanib. AXI = axitinib. EVE = everolimus. CAB = cabozantinib. BEV\_IFN = bevacizumab plus interferon- $\alpha$ . TEM\_BEV = temsirolimus plus bevacizumab. TIV = tivozanib. NIV\_IPI = nivolumab plus ipilimumab, PEM\_AXI = pembrolizumab and axitinib, AVE\_AXI= avelumab plus axitinib. Bold type font indicates significant values.

**Appendix Table 3:** For advanced/metastatic RCC of poor-risk, comparison of hazard ratios (95% CI) for **progression-free survival** from fixed and random models.

| Treatment compared with SUN | Fixed Model             | Random Model        |
|-----------------------------|-------------------------|---------------------|
| IFN                         | 1.87 (0.81- 4.32)       | 1.88 (0.03- 137.70) |
| EVE                         | 1.73 (0.96- 2.99)       | 1.68 (0.02- 89.46)  |
| CAB                         | 0.74 (0.35-1.58)        | 0.75 (0.01- 54.64)  |
| BEV_IFN                     | 1.50 (0.60-3.62)        | 1.50 (0.01- 344.20) |
| TEM_BEV                     | 1.20 (0.42-3.30)        | 1.22 (0.001- 1196)  |
| NIV_IPI                     | <b>0.57 (0.43-0.76)</b> | 0.57 (0.01- 36.17)  |
| PEM_AXI                     | <b>0.43 (0.23-0.80)</b> | 0.44 (0.01-53.85)   |
| AVE_AXI                     | <b>0.55 (0.28-1.10)</b> | 0.55 (0.01-43.91)   |
| DIC                         | 9.91                    | 11.42               |

Numbers in parentheses indicate 95% credible intervals. SUN = sunitinib. IFN = interferon- $\alpha$ .

EVE = everolimus. CAB = cabozantinib. BEV\_IFN = bevacizumab plus interferon- $\alpha$ . TEM\_BEV

= temsirolimus plus bevacizumab. NIV\_IPI = nivolumab plus ipilimumab, PEM\_AXI =

pembrolizumab and axitinib, AVE\_AXI= avelumab plus axitinib. Bold type font indicates

significant values.

**Appendix Table 4:** Comparison of odds ratios (95% CI) for **high-grade adverse event** from consistency and inconsistency models.

| Treatment compared with SUN       | Consistency Model   | Inconsistency Model |
|-----------------------------------|---------------------|---------------------|
| PLA                               | 0.40 (0.02, 8.55)   | 0.39 (0.02, 8.91)   |
| SOR                               | 2.83 (0.06, 150.75) | 2.65 (0.05, 160.98) |
| PAZ                               | 1.07 (0.12, 9.19)   | 1.05 (0.12, 9.74)   |
| TIV                               | 1.98 (0.02, 201.54) | 1.85 (0.02, 209.34) |
| CAB                               | 0.92 (0.09, 8.13)   | 0.95 (0.09, 9.10)   |
| SOR_IL-2                          | 5.29 (0.06, 499.51) | 4.89 (0.05, 495.91) |
| NIV_IPI                           | 0.49 (0.05, 4.26)   | 0.50 (0.06, 4.41)   |
|                                   | 1.30 (0.15, 12.14)  | 1.30 (0.15, 13.03)  |
|                                   | 1.00 (0.11, 8.77)   | 0.98 (0.11, 8.56)   |
| Random Effects Standard Deviation | 0.85 (0.07, 1.69)   | 0.85 (0.07, 1.70)   |
| Inconsistency Standard Deviation  | NA                  | 0.87 (0.04, 1.70)   |

Numbers in parentheses indicate 95% credible intervals. SUN = sunitinib. PLA = placebo. SOR = sorafenib. PAZ = pazopanib. TIV = tivozanib. CAB = cabozantinib. SOR\_IL-2= sorafenib plus interleukin-2. NIV\_IPI = nivolumab plus ipilimumab, PEM\_AXI = pembrolizumab and axitinib, AVE\_AXI= avelumab plus axitinib. Stepwise comparison of treatments did not find significant differences in rates of high-grade adverse events.

**Appendix Table 5:** Comparison of odds ratios (95% CI) for **overall-grade adverse event** from consistency and inconsistency models.

| <b>Treatment compared with SUN</b> | <b>Consistency Model</b> | <b>Inconsistency Model</b> |
|------------------------------------|--------------------------|----------------------------|
| PAZ                                | 2.28 (0.27, 23.95)       | 2.25 (0.30, 24.19)         |
| CAB                                | 1.05 (0.03, 45.23)       | 1.14 (0.03, 61.85)         |
| NIV_IPI                            | 0.34 (0.08, 1.40)        | 0.33 (0.08, 1.37)          |
| PEM_AXI                            | 0.38 (0.05, 2.41)        | 0.41 (0.06, 2.56)          |
| AVE_AXI                            | 1.61 (0.17, 19.17)       | 1.60 (0.15, 18.66)         |
| Random Effects Standard Deviation  | 0.52 (0.04, 1.03)        | 0.53 (0.04, 1.02)          |
| Inconsistency Standard Deviation   | NA                       | 0.53 (0.02, 1.02)          |

Numbers in parentheses indicate 95% credible intervals. SUN = sunitinib. PAZ = pazopanib. CAB = cabozantinib. NIV\_IPI = nivolumab plus ipilimumab, PEM\_AXI = pembrolizumab and axitinib, AVE\_AXI= avelumab plus axitinib. Stepwise comparison of treatments did not find significant differences in rates of overall-grade adverse events.

**Appendix Table 6:** Comparison of results from primary analysis and sensitivity analysis for trials assessing approved targeted drugs.

| Treatment | Primary Analysis<br>PFS HR (95% CI) vs SUN | Sensitivity Analysis<br>PFS HR (95% CI) vs SUN |
|-----------|--------------------------------------------|------------------------------------------------|
| PLA       | <b>2.63 (1.47-4.71)</b>                    | <b>2.55 (1.38 -4.66)</b>                       |
| IFN       | <b>2.70 (1.59-4.51)</b>                    | <b>2.71 (1.55 -4.71)</b>                       |
| SOR       | 1.47 (0.61-3.59)                           | 1.48 (0.62 -3.55)                              |
| PAZ       | 1.03 (0.74-1.44)                           | 1.02 (0.75 -1.41)                              |
| AXI       | 0.98 (0.36-2.76)                           | 0.95 (0.35 -2.54)                              |
| EVE       | 1.21 (0.81-1.86)                           | 1.20 (0.80-1.80)                               |
| BEV_IFN   | 1.66 (0.94 -2.88)                          | 1.67 (0.92 -3.07)                              |
| TEM_BEV   | <b>1.96 (1.04 -3.63)</b>                   | <b>2.00 (1.01 -4.03)</b>                       |
| TIV       | 0.92 (0.37-2.33)                           | NA                                             |
| NIV_IPI   | <b>2.21 (1.50-3.38)</b>                    | <b>2.18 (1.46-3.20)</b>                        |

HR = hazard ratio. CI = confidence interval. Numbers in parentheses indicate 95% credible intervals. SUN = sunitinib. PLA = placebo. IFN = interferon- $\alpha$ . SOR = sorafenib. PAZ = pazopanib. AXI = axitinib. EVE = everolimus. BEV\_IFN = bevacizumab plus interferon- $\alpha$ . TEM\_BEV = temsirolimus plus bevacizumab. TIV = tivozanib. NIV\_IPI = nivolumab plus ipilimumab. Bold type font indicates significant values.



# PRISMA 2009 Checklist

| Section/topic                      | #  | Checklist item                                                                                                                                                                                                                                                                                              | Reported on page # |
|------------------------------------|----|-------------------------------------------------------------------------------------------------------------------------------------------------------------------------------------------------------------------------------------------------------------------------------------------------------------|--------------------|
| <b>TITLE</b>                       |    |                                                                                                                                                                                                                                                                                                             |                    |
| Title                              | 1  | Identify the report as a systematic review, meta-analysis, or both.                                                                                                                                                                                                                                         | 1                  |
| <b>ABSTRACT</b>                    |    |                                                                                                                                                                                                                                                                                                             |                    |
| Structured summary                 | 2  | Provide a structured summary including, as applicable: background; objectives; data sources; study eligibility criteria, participants, and interventions; study appraisal and synthesis methods; results; limitations; conclusions and implications of key findings; systematic review registration number. | 2                  |
| <b>INTRODUCTION</b>                |    |                                                                                                                                                                                                                                                                                                             |                    |
| Rationale                          | 3  | Describe the rationale for the review in the context of what is already known.                                                                                                                                                                                                                              | 5                  |
| Objectives                         | 4  | Provide an explicit statement of questions being addressed with reference to participants, interventions, comparisons, outcomes, and study design (PICOS).                                                                                                                                                  | 5                  |
| <b>METHODS</b>                     |    |                                                                                                                                                                                                                                                                                                             |                    |
| Protocol and registration          | 5  | Indicate if a review protocol exists, if and where it can be accessed (e.g., Web address), and, if available, provide registration information including registration number.                                                                                                                               | 5                  |
| Eligibility criteria               | 6  | Specify study characteristics (e.g., PICOS, length of follow-up) and report characteristics (e.g., years considered, language, publication status) used as criteria for eligibility, giving rationale.                                                                                                      | 5, 6               |
| Information sources                | 7  | Describe all information sources (e.g., databases with dates of coverage, contact with study authors to identify additional studies) in the search and date last searched.                                                                                                                                  | 5                  |
| Search                             | 8  | Present full electronic search strategy for at least one database, including any limits used, such that it could be repeated.                                                                                                                                                                               | 5                  |
| Study selection                    | 9  | State the process for selecting studies (i.e., screening, eligibility, included in systematic review, and, if applicable, included in the meta-analysis).                                                                                                                                                   | 5, 6               |
| Data collection process            | 10 | Describe method of data extraction from reports (e.g., piloted forms, independently, in duplicate) and any processes for obtaining and confirming data from investigators.                                                                                                                                  | 6                  |
| Data items                         | 11 | List and define all variables for which data were sought (e.g., PICOS, funding sources) and any assumptions and simplifications made.                                                                                                                                                                       | 6                  |
| Risk of bias in individual studies | 12 | Describe methods used for assessing risk of bias of individual studies (including specification of whether this was done at the study or outcome level), and how this information is to be used in any data synthesis.                                                                                      | 6                  |
| Summary measures                   | 13 | State the principal summary measures (e.g., risk ratio, difference in means).                                                                                                                                                                                                                               | 6                  |
| Synthesis of results               | 14 | Describe the methods of handling data and combining results of studies, if done, including measures of consistency (e.g., I <sup>2</sup> ) for each meta-analysis.                                                                                                                                          | 7                  |



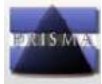

# PRISMA 2009 Checklist

Page 1 of 2

| Section/topic                 | #  | Checklist item                                                                                                                                                                                           | Reported on page # |
|-------------------------------|----|----------------------------------------------------------------------------------------------------------------------------------------------------------------------------------------------------------|--------------------|
| Risk of bias across studies   | 15 | Specify any assessment of risk of bias that may affect the cumulative evidence (e.g., publication bias, selective reporting within studies).                                                             | 6                  |
| Additional analyses           | 16 | Describe methods of additional analyses (e.g., sensitivity or subgroup analyses, meta-regression), if done, indicating which were pre-specified.                                                         | 7                  |
| <b>RESULTS</b>                |    |                                                                                                                                                                                                          |                    |
| Study selection               | 17 | Give numbers of studies screened, assessed for eligibility, and included in the review, with reasons for exclusions at each stage, ideally with a flow diagram.                                          | 8                  |
| Study characteristics         | 18 | For each study, present characteristics for which data were extracted (e.g., study size, PICOS, follow-up period) and provide the citations.                                                             | 8                  |
| Risk of bias within studies   | 19 | Present data on risk of bias of each study and, if available, any outcome level assessment (see item 12).                                                                                                | 8                  |
| Results of individual studies | 20 | For all outcomes considered (benefits or harms), present, for each study: (a) simple summary data for each intervention group (b) effect estimates and confidence intervals, ideally with a forest plot. | 8                  |
| Synthesis of results          | 21 | Present results of each meta-analysis done, including confidence intervals and measures of consistency.                                                                                                  | 8-10               |
| Risk of bias across studies   | 22 | Present results of any assessment of risk of bias across studies (see Item 15).                                                                                                                          | 11                 |
| Additional analysis           | 23 | Give results of additional analyses, if done (e.g., sensitivity or subgroup analyses, meta-regression [see Item 16]).                                                                                    | 11                 |
| <b>DISCUSSION</b>             |    |                                                                                                                                                                                                          |                    |
| Summary of evidence           | 24 | Summarize the main findings including the strength of evidence for each main outcome; consider their relevance to key groups (e.g., healthcare providers, users, and policy makers).                     | 11                 |
| Limitations                   | 25 | Discuss limitations at study and outcome level (e.g., risk of bias), and at review-level (e.g., incomplete retrieval of identified research, reporting bias).                                            | 15                 |
| Conclusions                   | 26 | Provide a general interpretation of the results in the context of other evidence, and implications for future research.                                                                                  | 15                 |
| <b>FUNDING</b>                |    |                                                                                                                                                                                                          |                    |
| Funding                       | 27 | Describe sources of funding for the systematic review and other support (e.g., supply of data); role of funders for the systematic review.                                                               | 16                 |

From: Moher D, Liberati A, Tetzlaff J, Altman DG, The PRISMA Group (2009). Preferred Reporting Items for Systematic Reviews and Meta-Analyses: The PRISMA Statement. PLoS Med 6(7): e1000097. doi:10.1371/journal.pmed1000097

For more information, visit: [www.prisma-statement.org](http://www.prisma-statement.org).

Page 2 of 2

For peer review only - <http://bmjopen.bmj.com/site/about/guidelines.xhtml>
